# Supplementary material for: Nanoconfinement matters in humidified CO2 interaction with metal silicates
Source: Royal Society of Chemistry journal article supplement (doi:10.1039/d2en00148a), 2022-01-01
Supplement: d2en00148a1.pdf [file d2en00148a1.pdf]

## Supplementary Information: Nanoconfinement Matters in Humidified CO<sub>2</sub> Interaction with Metal Silicates

S. Zare<sup>1</sup>, K.M. Salah Uddin<sup>2</sup>, A. Funk<sup>2,3</sup>, Quin R.S. Miller<sup>4</sup>, M.Ja. Abdolhosseini Qomi<sup>1,\*</sup>

<sup>1</sup>Department of Civil and Environmental Engineering, Henry Samueli School of Engineering, E4130 Engineering Gateway, University of California, Irvine, Irvine, CA, 92697-2175, USA.

<sup>2</sup>Construction Materials Chemistry Department, University of Kassel, Germany, Mönchebergstraße 19, 34125 Kassel, Germany.

<sup>3</sup>Chemistry Department, University of Siegen, Adolf-Reichwein-Straße 2, 57068 Siegen, Germany.

<sup>4</sup>Physical and Computational Sciences Directorate, Pacific Northwest National Laboratory, P. O. Box 999, MS K8-98, Richland, WA 99352, USA

**Supplementary Note 1: H<sub>2</sub>O-CO<sub>2</sub> mixture adsorption in the macro-pore:** Grand Canonical Monte Carlo (GCMC) simulations were used to determine the thermodynamic properties of the bulk H<sub>2</sub>O-CO<sub>2</sub> mixture. We used the method of Configurational Biased Monte Carlo (CBMC)<sup>1,2</sup> as implemented in Towhee<sup>3</sup> to adsorb the mixture into a periodic box with dimensions (40 Å × 40 Å × 40 Å) in the grand canonical ensemble ( $\mu_{H_2O}, \mu_{CO_2}, VT$ ). The cell dimensions are taken large enough to reduce the standard deviation of the solvent concentration as much as possible. The corresponding biased probabilities are given in the main text. We performed these GCMC simulations by considering 315 pairs of chemical potentials ( $\mu_{H_2O}, \mu_{CO_2}$ ) in the ranges [-49,-42] kJ/mol and [-40, -30] kJ/mol for water and CO<sub>2</sub> respectively except for the simulations that were done at 348K with CO<sub>2</sub>-rich condition where the chemical potential of water was in the range [-49,-45] kJ/mol. To examine whether phase coexistence exists, we assumed two different initial mixture compositions relevant to CO<sub>2</sub>-rich and H<sub>2</sub>O-rich conditions for all pairs of chemical potentials. Higher initial number of CO<sub>2</sub> molecules than water molecules were put on the lattice points for the CO<sub>2</sub>-rich cases, and liquid water for the H<sub>2</sub>O-rich cases were considered. We used rigid SPC<sup>4</sup> model and EPM2 model<sup>5</sup> for water and CO<sub>2</sub> respectively. All simulations are equilibrated for more than 25 million MC steps. The results are shown in **Fig. S1** and **Fig. S2** for temperatures of 348K and 300K respectively. The phase of the H<sub>2</sub>O-CO<sub>2</sub> mixture is determined by  $\mu_{H_2O}$  or  $\mu_{CO_2}$  or both. At a specific range of chemical potentials, the mixture could be in coexisting CO<sub>2</sub>-rich and H<sub>2</sub>O-rich phases with two degrees of freedom ( $\mu_{H_2O}, \mu_{CO_2}$ ) consistent with the Gibbs phase rule:

$$F = 2 + C - P$$

Where two degrees of freedom (F) is derived for a two-component immiscible mixture (C=2) with two phases (gas or liquid) (P=2). As expected for immiscible mixtures, CO<sub>2</sub> was calculated to be dominant when water is below saturation level ( $\mu \leq 47 \frac{kJ}{mol}$  at 348K and  $\mu \leq 46 \frac{kJ}{mol}$  at 300K) as

it could only be found in vapor form in that regime, see **Fig. S1.e** and **Fig. S2.e**. The density and pressure of CO<sub>2</sub>-rich mixtures are merely controlled by the chemical potential of CO<sub>2</sub>, see density and pressure colormaps in **Fig. S1** and **Fig. S2** for CO<sub>2</sub>-rich phases. In the H<sub>2</sub>O-rich phase, as water is found in liquid form the density is around 1 g/cm<sup>3</sup> while the pressure is mostly controlled by the chemical potential of water. On the other hand, the molar fractions of components are sensitive to the chemical potential of both components, like in **Fig.S1.b** where the lowest CO<sub>2</sub> mole fraction is reached at the lowest  $\mu_{CO_2}$  and highest  $\mu_{H_2O}$ , and as we move from top left to bottom right of the diagram this molar fraction increases. To make the molar fractions clearer, H<sub>2</sub>O molar fractions are depicted in **Fig. S3** for the regions of chemical potential space where CO<sub>2</sub> is dominant.

**Supplementary Note 2: H<sub>2</sub>O-CO<sub>2</sub> mixture adsorption in the slit nanopore:** Upon GCMC calculations in the slit-pore of the mineral, CO<sub>2</sub> could only penetrate the slit pore when the interlayer distance is more than 30 Å, as could be seen in **Fig. S4.a**. At interlayer distances of less than 20 Å, the density of capillary water is found to be higher than its bulk value (1 g/cm<sup>3</sup>) consistent with the simulations on the ultra-confined nature of water in CSH<sup>6,7</sup>, see **Fig S4-b**.

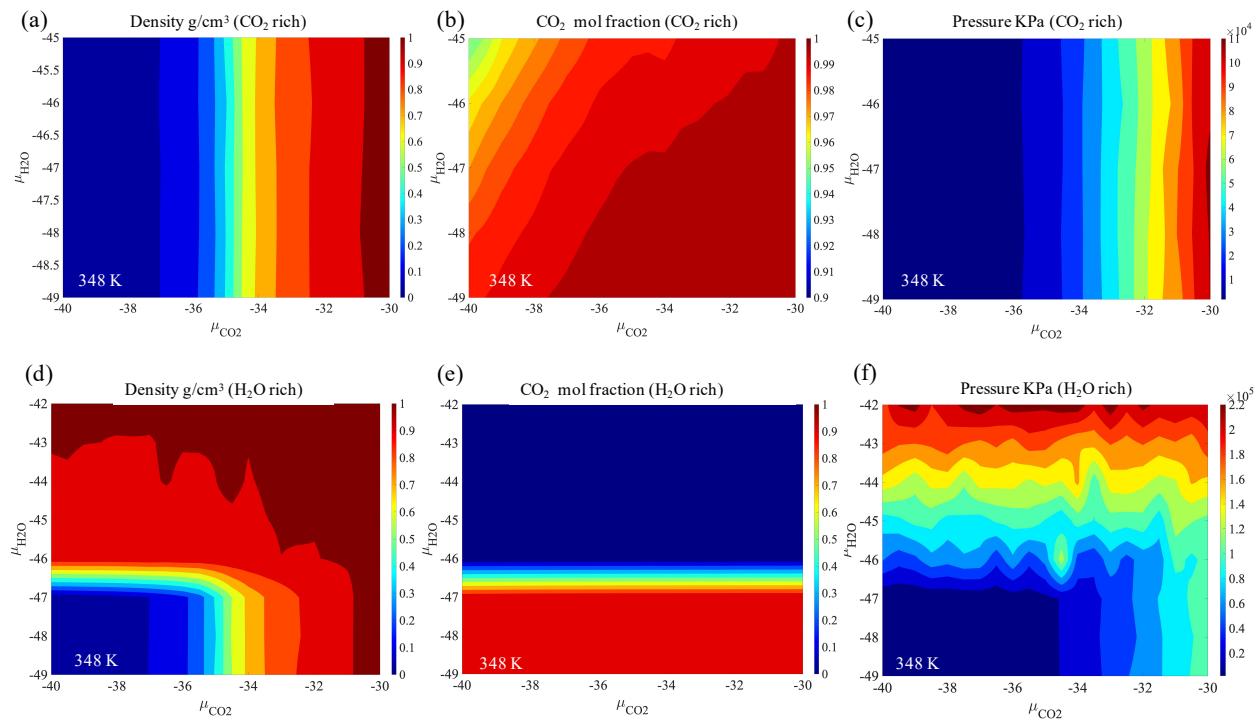

**Supplementary Fig. S1.** Adsorption of CO<sub>2</sub>-H<sub>2</sub>O mixture in the macro-pore at 348K. Colormaps of different thermodynamic properties are derived based on the independent variables ( $\mu_{H_2O}, \mu_{CO_2}$ ). (a) density derived for a box initially at CO<sub>2</sub>-rich condition. (b) CO<sub>2</sub> mole fraction derived for a box initially at CO<sub>2</sub>-rich condition. (c) Pressure derived for a box initially at CO<sub>2</sub>-rich condition. scCO<sub>2</sub> points at 100bar and 200bar were chosen for slit-pore adsorption. (d) Density for a box initially at H<sub>2</sub>O-rich condition. (e) CO<sub>2</sub> mole fraction derived for a box initially at H<sub>2</sub>O-rich condition. (f) Pressure derived for a box initially at H<sub>2</sub>O-rich condition.

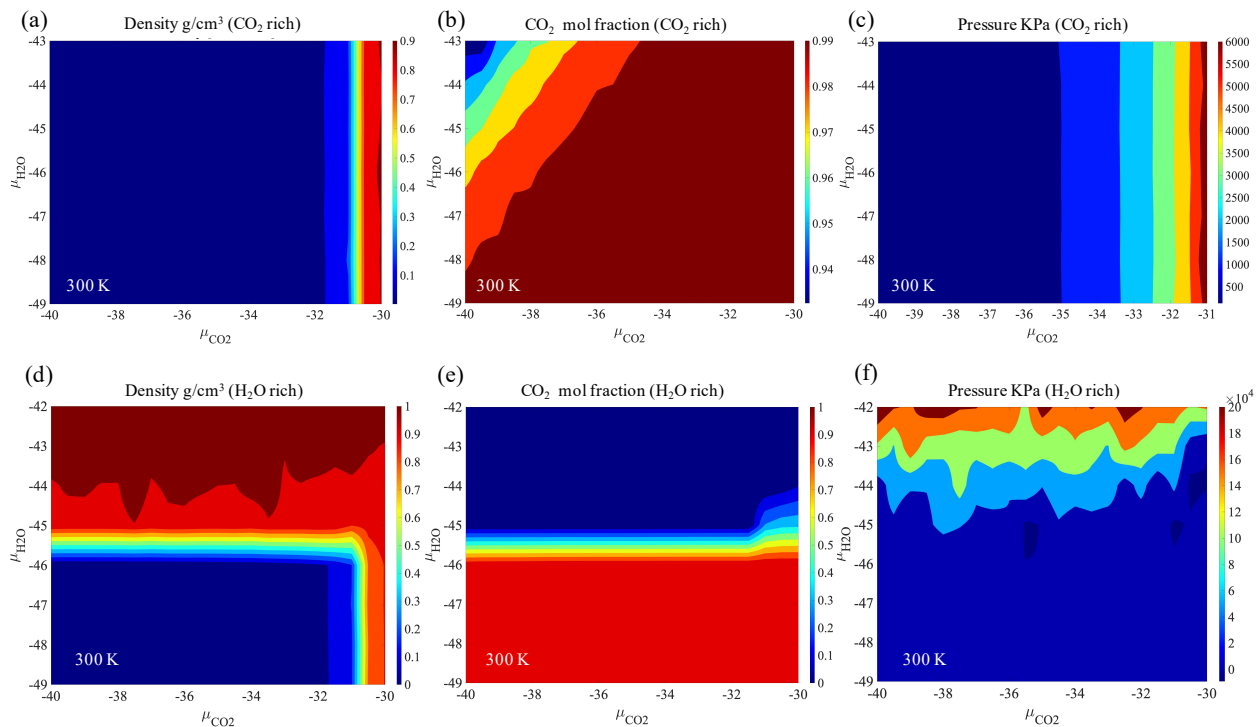

**Supplementary Fig. S2.** Adsorption of CO<sub>2</sub>-H<sub>2</sub>O mixture in the macro-pore at 300K. Colormaps of different thermodynamic properties are derived based on the independent variables ( $\mu_{\text{H}_2\text{O}}, \mu_{\text{CO}_2}$ ). (a) density derived for a box initially at CO<sub>2</sub>-rich condition. (b) CO<sub>2</sub> mole fraction derived for a box initially at CO<sub>2</sub>-rich condition. (c) Pressure derived for a box initially at CO<sub>2</sub>-rich condition. sbCO<sub>2</sub> at 20bar and normal condition at 1 bar were chosen for slit-pore adsorption (d) Density for a box initially at H<sub>2</sub>O-rich condition. (e) CO<sub>2</sub> mole fraction derived for a box initially at H<sub>2</sub>O-rich condition. (f) Pressure derived for a box initially at H<sub>2</sub>O-rich condition.

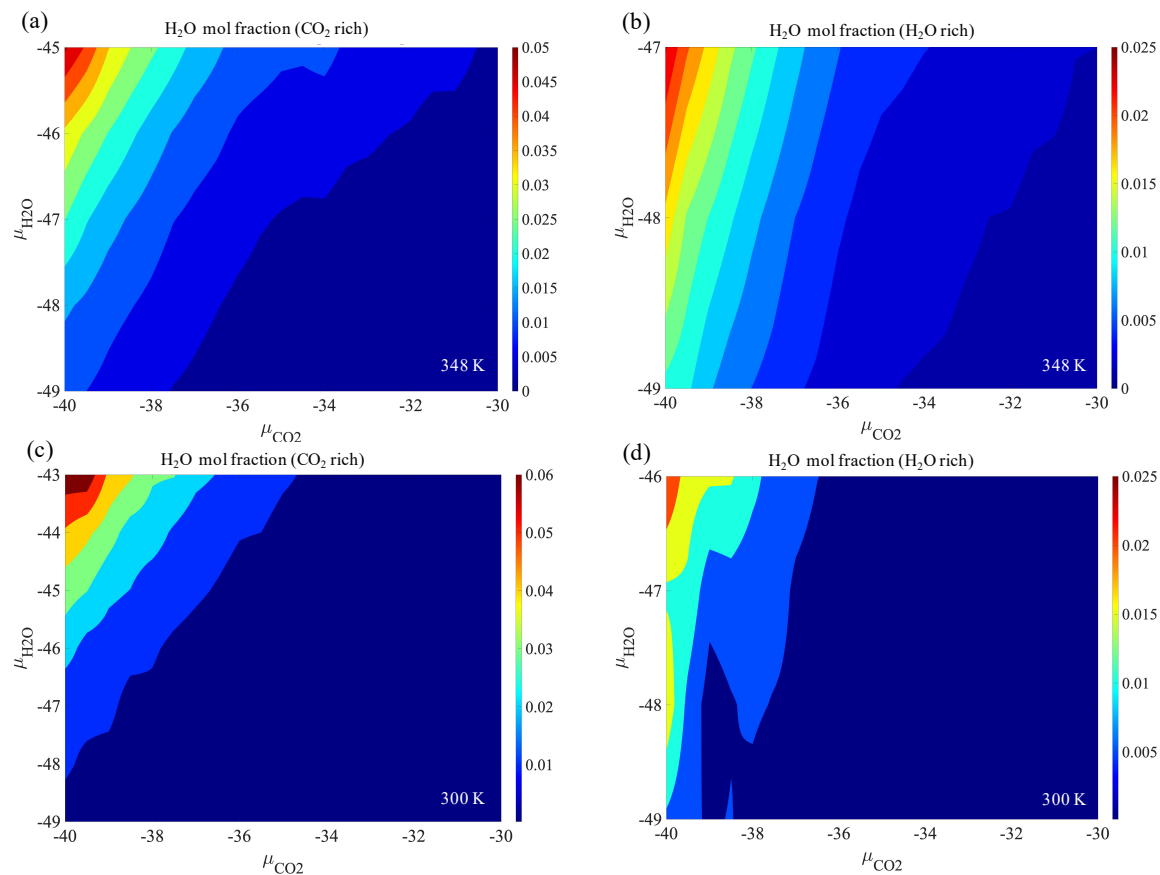

**Supplementary Fig. S3.** H<sub>2</sub>O mole fraction in the macropore dominated by CO<sub>2</sub>. (a) Mole fraction of water at 348K in a cell initially rich with water. It was converged to the CO<sub>2</sub>-rich phase for the below saturation conditions  $\mu_{H_2O} \leq 47 \text{ kJ/mol}$ . (b) Mole fraction of water at 348K in a cell initially rich with CO<sub>2</sub>. (c) Mole fraction of water at 300K in a cell initially rich with CO<sub>2</sub>. (d) Mole fraction of water at 300K in a cell initially rich with water. It was converged to the CO<sub>2</sub>-rich phase for when  $\mu_{H_2O} \leq 46 \text{ kJ/mol}$ .

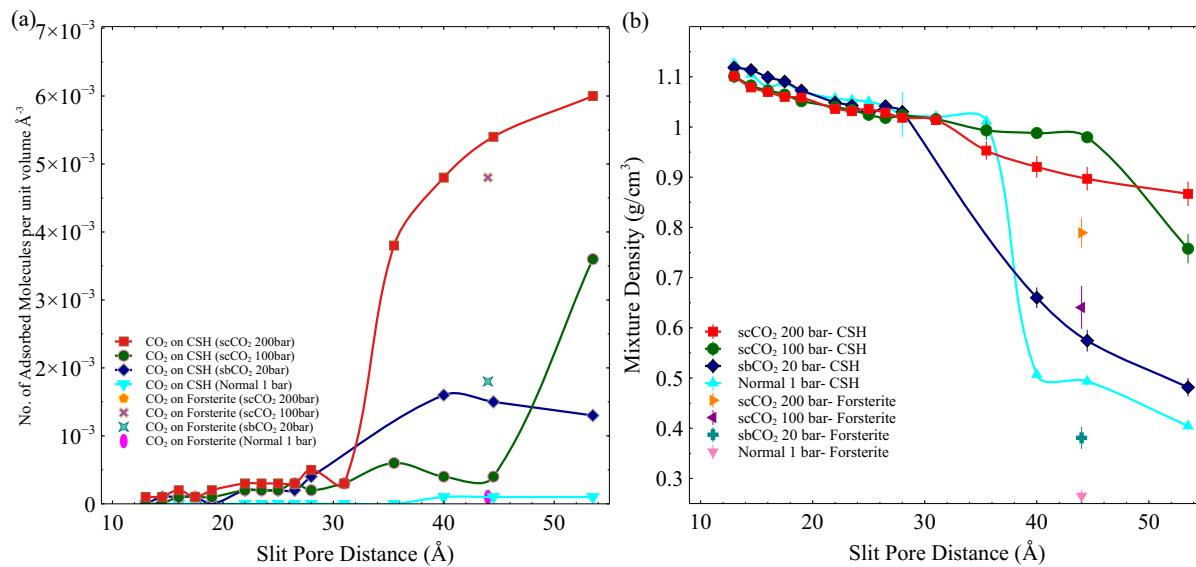

**Supplementary Fig. S4.** Adsorption of CO<sub>2</sub>-H<sub>2</sub>O mixture in the slit-pore of rock. (a) Number of adsorbed molecules per unit volume based on the slit-pore distance. 1/V dashed line shows that the number of water molecules is constant. It shows that after a certain distance only interfacial water exists. (b) The density of the mixture based on the slit-pore distance at various thermodynamic conditions.

**Supplementary Table S1.** Total energies of the structures in Density Functional Theory (DFT) calculations of the reactions between CO<sub>2</sub> and water/hydroxyl on the surface of C-S-H.

| States             | Total Energy (hartree) |
|--------------------|------------------------|
| 2-ADS              | -10151.30712           |
| 2-TS               | -10151.30456           |
| 2-P                | -10151.32684           |
| 1-ADS/3-ADS        | -10151.30677           |
| 1-TS1/3-TS1        | -10151.2408            |
| 1-INT/3-INT        | -10151.28913           |
| 1-INT <sup>a</sup> | -10151.28611           |
| 3-TS2              | -10151.28502           |
| 3-P                | -10151.29313           |
| 3-INT <sup>b</sup> | -10151.28599           |
| 1-TS2              | -10151.2798            |
| 1-P                | -10151.31577           |

<sup>a</sup> The geometry of this state is depicted in panel (d) of Fig. 8 in the main text. Compared to INT-1 in panel (c), the carbonic acid is rotated, and a weak hydrogen bond is formed between the hydroxyl group in carbonic acid and the surface hydroxide in C-S-H.

<sup>b</sup> The geometry of this state is depicted in panel (e) of Fig. 8 in the main text. Compared to INT-3 in panel (c), the carbonic acid is rotated and two hydrogen bond are formed between carbonic acid and the silicate dimer on the surface of C-S-H.

## Optimized geometries of DFT calculations with revPBE

### 2-ADS

|    |             |             |             |
|----|-------------|-------------|-------------|
| Si | 3.54406144  | 12.17788652 | 13.35862272 |
| Si | 6.07550816  | 16.28779392 | 13.91083625 |
| Si | 6.63404103  | 12.59294670 | 18.27311905 |
| Si | 5.46256645  | 9.65651266  | 18.04776334 |
| Si | 7.28896976  | 19.03467240 | 14.57960618 |
| Si | 10.43002300 | 22.43139905 | 15.26500015 |
| Si | 5.98265228  | 6.50330447  | 13.41810595 |
| Si | 8.47015719  | 10.71912362 | 13.83081517 |
| Si | 9.20123247  | 7.20436737  | 18.18217090 |
| Si | 7.81529184  | 4.48380762  | 18.38155389 |
| Si | 10.03326257 | 13.42329348 | 13.98017214 |
| Si | 12.35989272 | 17.35305826 | 14.82031000 |
| Si | 13.14425113 | 13.41292619 | 18.97527327 |
| Si | 11.67779556 | 10.74493720 | 18.42085351 |
| Si | 9.04325012  | 0.72626843  | 14.91965528 |
| Si | 11.14574418 | 4.52389683  | 14.69772444 |
| Si | 12.93513768 | 1.14911147  | 18.84972967 |
| Si | 14.61199105 | 22.74514236 | 19.16923134 |
| Si | 12.71073186 | 7.45501323  | 14.63637780 |
| Si | 1.97974054  | 9.37534023  | 13.50012369 |
| Si | 3.10681350  | 5.80262574  | 17.83970865 |
| Si | 1.73516970  | 3.29769713  | 18.76268143 |
| Si | 14.46875519 | 19.67562972 | 14.50246197 |
| Si | 4.35496355  | 17.91023184 | 18.95144058 |
| Si | 2.45857805  | 16.11006230 | 17.53058345 |



|    |             |             |             |
|----|-------------|-------------|-------------|
| Si | 5.79869124  | 24.12238860 | 13.23014876 |
| Si | 4.31178742  | 3.64346921  | 13.69604122 |
| Si | 5.69338309  | 0.45950976  | 18.85675176 |
| Si | 7.66795597  | 21.71566448 | 18.61119994 |
| Si | 16.59055855 | 14.24046347 | 14.78185152 |
| Si | 19.20063568 | 17.37024133 | 15.03985230 |
| Si | 20.08715845 | 13.80702640 | 19.33845170 |
| Si | 18.69342844 | 11.25030326 | 18.29686311 |
| Si | 20.06976777 | 20.07329671 | 13.72168379 |
| Si | 22.61964634 | 23.43140355 | 13.32396740 |
| Si | 24.80675500 | 19.98346143 | 16.66519417 |
| Si | 22.61479303 | 19.04789529 | 18.35721878 |
| Si | 18.82956164 | 8.10253089  | 13.27891661 |
| Si | 20.95247580 | 12.38737247 | 13.82774393 |
| Si | 22.55261716 | 14.96197667 | 14.10049086 |
| Si | 26.28289838 | 15.32189229 | 16.89585195 |
| Si | 24.73954753 | 12.57412839 | 17.79788655 |
| Si | 21.39465252 | 1.65128966  | 13.06513066 |
| Si | 24.25026801 | 6.31029601  | 12.27984419 |
| Si | 25.76706635 | 3.34197460  | 16.84431572 |
| Si | 23.86968422 | 0.76615971  | 17.59149581 |
| Si | 25.41113556 | 9.04982702  | 12.89546411 |
| Si | 15.20533306 | 11.41100283 | 14.30720894 |
| Si | 16.65671185 | 7.51161890  | 18.41180939 |
| Si | 14.81393590 | 5.07298498  | 18.57032462 |
| Si | 29.96960083 | 23.74042486 | 12.73848106 |
| Si | 17.83065751 | 19.84281477 | 19.11512262 |

|    |             |             |             |
|----|-------------|-------------|-------------|
| Si | 15.86622292 | 17.31947174 | 19.32956779 |
| Si | 17.32864292 | 5.38247814  | 13.30454717 |
| Si | 18.39385707 | 2.30757449  | 17.76077073 |
| Si | 20.40785863 | 23.77165826 | 17.89495826 |
| Ca | 6.63247476  | 12.99316153 | 14.90445115 |
| Ca | 4.87033356  | 9.71296353  | 15.02213815 |
| Ca | 3.30471916  | 12.44802865 | 16.90947516 |
| Ca | 5.38363442  | 15.64101893 | 16.87447785 |
| Ca | 10.26003050 | 19.77181729 | 16.81229095 |
| Ca | 8.91669007  | 16.42430108 | 15.52179921 |
| Ca | 7.46346258  | 18.63379692 | 18.42602916 |
| Ca | 10.76901679 | 22.30055178 | 19.24812135 |
| Ca | 9.52038570  | 7.36907149  | 14.68399495 |
| Ca | 7.59085871  | 3.89009213  | 14.71815998 |
| Ca | 6.42892670  | 6.86387721  | 16.53340119 |
| Ca | 8.43922873  | 10.07234501 | 17.10454505 |
| Ca | 13.33434126 | 14.03326886 | 15.81671450 |
| Ca | 11.66412472 | 10.58984499 | 15.38514052 |
| Ca | 9.99401274  | 13.44121527 | 18.15042094 |
| Ca | 12.09114740 | 16.74592110 | 18.20279098 |
| Ca | 11.95613089 | 1.82472118  | 15.74953118 |
| Ca | 13.11681443 | 22.29941072 | 16.59657283 |
| Ca | 9.38773136  | 1.38964337  | 18.90795125 |
| Ca | 11.34178201 | 4.52420704  | 18.65698993 |
| Ca | 2.93927986  | 6.42968988  | 14.37168153 |
| Ca | 2.27991518  | 2.72416296  | 15.60755329 |
| Ca | 12.83814845 | 7.75989199  | 17.90262392 |

|    |             |             |             |
|----|-------------|-------------|-------------|
| Ca | 1.90910976  | 9.34243404  | 17.09558036 |
| Ca | 3.81973756  | 18.77512239 | 15.25832413 |
| Ca | 26.82026036 | 12.74787640 | 15.06300898 |
| Ca | 14.53192501 | 19.79123998 | 18.19402740 |
| Ca | 4.42437883  | 21.34110903 | 18.38296457 |
| Ca | 5.32172187  | 0.96162737  | 15.13819891 |
| Ca | 5.52305713  | 21.88488229 | 15.48894235 |
| Ca | 5.86228982  | 24.19903512 | 17.86237354 |
| Ca | 5.07089387  | 3.47281966  | 17.73207790 |
| Ca | 20.19937136 | 14.42571904 | 16.21181259 |
| Ca | 18.25732507 | 11.23462799 | 15.35979101 |
| Ca | 16.57684074 | 14.01295857 | 18.31094645 |
| Ca | 19.82972183 | 16.82856420 | 18.74024347 |
| Ca | 22.49567443 | 21.36696156 | 15.53748397 |
| Ca | 22.30249625 | 17.63220921 | 15.75420198 |
| Ca | 20.46080659 | 20.94637693 | 18.39521661 |
| Ca | 23.80468248 | 23.90847775 | 17.16829515 |
| Ca | 22.17065912 | 9.06327033  | 13.66368484 |
| Ca | 20.87533092 | 5.17106610  | 13.87038504 |
| Ca | 19.93003556 | 8.05673703  | 16.71342401 |
| Ca | 21.87002562 | 11.25115101 | 17.11562771 |
| Ca | 26.20005548 | 17.74937586 | 15.19373736 |
| Ca | 24.20379535 | 12.11635664 | 12.40933538 |
| Ca | 23.29235492 | 15.40721269 | 18.11798632 |
| Ca | 28.32933917 | 19.51165819 | 17.73430092 |
| Ca | 24.55037896 | 1.60205149  | 14.55006791 |
| Ca | 25.97562046 | 22.52074342 | 13.36044443 |

|    |             |             |             |
|----|-------------|-------------|-------------|
| Ca | 21.57959001 | 3.22652597  | 16.61433712 |
| Ca | 26.85955643 | 6.23851461  | 16.75155051 |
| Ca | 16.21270147 | 8.02599421  | 15.41711020 |
| Ca | 14.24745421 | 4.84846214  | 15.20896837 |
| Ca | 25.05112575 | 9.62847103  | 16.30965303 |
| Ca | 15.13863794 | 10.72137235 | 18.03309884 |
| Ca | 17.23938902 | 20.17790148 | 15.47126528 |
| Ca | 15.55683287 | 16.96805655 | 16.37713723 |
| Ca | 28.96749810 | 22.52734078 | 15.75874073 |
| Ca | 17.43730816 | 22.90632482 | 17.48228379 |
| Ca | 18.73063435 | 2.09351779  | 14.68129907 |
| Ca | 19.63639883 | 23.50321937 | 14.50104696 |
| Ca | 15.29144374 | 2.02052227  | 17.01034227 |
| Ca | 17.62472229 | 4.88992574  | 16.48263760 |
| Ca | 10.71507027 | 19.15357257 | 13.29339532 |
| Ca | 5.73688269  | 6.49801192  | 20.12994570 |
| Ca | 6.26589887  | 11.19820444 | 11.70845278 |
| Ca | 6.49119931  | 15.39349167 | 20.34059950 |
| Ca | 12.73597669 | 12.47838182 | 12.78882000 |
| Ca | 6.90644664  | 3.02794697  | 21.34259943 |
| Ca | 8.55539109  | 5.58756485  | 11.89749865 |
| Ca | 10.75388337 | 11.33219741 | 21.39362875 |
| Ca | 26.89133141 | 3.95787649  | 13.22165488 |
| Ca | 9.45140243  | 2.13061578  | 23.34722589 |
| Ca | 12.59334873 | 22.13564660 | 12.98190198 |
| Ca | 13.80436355 | 7.69543485  | 22.15198773 |
| Ca | 8.85716479  | 22.22610477 | 12.59293907 |

|    |             |             |             |
|----|-------------|-------------|-------------|
| Ca | 17.68972969 | 15.43969571 | 21.34974957 |
| Ca | 2.46994834  | 15.82010699 | 14.31727509 |
| Ca | 5.99960718  | 22.25531085 | 21.46712096 |
| Ca | 20.71950691 | 17.14241189 | 12.16870698 |
| Ca | 16.79323276 | 11.68577719 | 21.55103933 |
| Ca | 18.62271638 | 14.44056212 | 12.74250405 |
| Ca | 20.40940216 | 19.06929764 | 21.45624693 |
| Ca | 25.78237738 | 14.68259095 | 12.22938086 |
| Ca | 19.87712923 | 5.22173492  | 19.05584405 |
| Ca | 21.47593229 | 6.97167801  | 11.09934522 |
| Ca | 22.72445099 | 12.17223559 | 20.65793161 |
| Ca | 12.12273611 | 6.16421690  | 11.83244587 |
| Ca | 26.27319311 | 21.93079174 | 18.68613183 |
| Ca | 23.77918782 | 1.03131745  | 11.22992308 |
| Ca | 23.31578303 | 6.25910448  | 17.96104906 |
| Ca | 17.94216978 | 1.01058398  | 11.39898082 |
| Ca | 28.55130805 | 20.33257545 | 21.02534281 |
| Ca | 17.00735192 | 17.46804443 | 12.93502407 |
| Ca | 16.17976644 | 0.66785198  | 20.64554748 |
| O  | 2.60363477  | 10.82561234 | 13.18275176 |
| O  | 7.23252721  | 17.54252740 | 13.86614447 |
| O  | 6.37141208  | 10.96543081 | 18.66401771 |
| O  | 11.82770682 | 23.32640563 | 14.73811218 |
| O  | 4.94347585  | 5.12286991  | 13.33462120 |
| O  | 8.89853843  | 12.25331232 | 14.36450445 |
| O  | 8.02828745  | 6.13116327  | 18.74708577 |
| O  | 13.07807741 | 18.77726652 | 14.22448239 |

|   |             |             |             |
|---|-------------|-------------|-------------|
| O | 12.06939232 | 12.16278236 | 19.26318335 |
| O | 11.99404345 | 5.93137370  | 14.28128142 |
| O | 15.73757339 | 23.88656411 | 19.63295503 |
| O | 2.72590652  | 4.57115920  | 19.02845248 |
| O | 4.62217575  | 22.81531554 | 13.48192025 |
| O | 2.29019434  | 17.50460319 | 16.72970339 |
| O | 8.14129258  | 23.21830204 | 19.33140945 |
| O | 16.13231788 | 12.77295005 | 14.06994278 |
| O | 20.34747100 | 18.57922606 | 14.36530454 |
| O | 19.85384045 | 12.45682184 | 18.30947257 |
| O | 20.00062444 | 0.71840381  | 12.66809591 |
| O | 24.22857242 | 19.38176009 | 18.14620690 |
| O | 17.73478747 | 6.94499548  | 12.73551620 |
| O | 21.10316997 | 14.06185038 | 13.56006138 |
| O | 25.76311141 | 13.79303200 | 17.26479123 |
| O | 25.45668168 | 7.42475825  | 12.51943751 |
| O | 25.02273653 | 1.87887670  | 17.10824522 |
| O | 15.86199435 | 6.24283326  | 19.10734710 |
| O | 16.49686171 | 18.90605758 | 19.03529399 |
| O | 17.67615282 | 1.01000284  | 18.60083713 |
| O | 4.44161845  | 12.05242000 | 14.72268145 |
| O | 2.50093165  | 13.45987217 | 13.69707648 |
| O | 6.72428282  | 15.28751080 | 15.04635894 |
| O | 4.64411763  | 16.75771124 | 14.51695060 |
| O | 8.00965040  | 12.52662962 | 17.39206867 |
| O | 5.51455166  | 13.32035603 | 17.33269025 |
| O | 6.31467750  | 9.21428154  | 16.67715293 |

|   |             |             |             |
|---|-------------|-------------|-------------|
| O | 4.07486712  | 10.23166933 | 17.41100652 |
| O | 8.16950870  | 18.90938566 | 15.92594563 |
| O | 5.90349889  | 19.79802686 | 14.59345760 |
| O | 10.73371030 | 22.26943457 | 16.81624679 |
| O | 9.09191143  | 23.08078929 | 14.67178752 |
| O | 5.09762036  | 7.47412304  | 14.37348554 |
| O | 7.30637682  | 6.12649618  | 14.29708038 |
| O | 6.86139499  | 10.63478959 | 13.92043819 |
| O | 9.30424169  | 9.70230690  | 14.73361666 |
| O | 8.65267653  | 7.60535557  | 16.70865717 |
| O | 10.69584230 | 6.66644133  | 18.22904607 |
| O | 7.14087527  | 4.37876333  | 16.88598327 |
| O | 9.16602415  | 3.64240097  | 18.59110506 |
| O | 9.48056584  | 14.87310875 | 14.14914489 |
| O | 11.42837595 | 12.98672183 | 14.67460820 |
| O | 10.89757449 | 17.90595363 | 15.31762620 |
| O | 13.22592686 | 16.55870287 | 15.92613239 |
| O | 12.30217301 | 14.46758902 | 18.06138035 |
| O | 27.97045528 | 11.43859508 | 16.36909020 |
| O | 10.52921370 | 11.18356192 | 17.34563535 |
| O | 12.91029881 | 10.15716859 | 17.55743425 |
| O | 7.71397133  | 1.55111106  | 14.59084225 |
| O | 9.85799564  | 0.86830793  | 16.29307514 |
| O | 9.62442561  | 4.84937722  | 14.36845748 |
| O | 11.65720777 | 4.03504925  | 16.14363036 |
| O | 4.29118189  | 23.21200798 | 16.80329170 |
| O | 11.70844315 | 2.15713466  | 18.96125779 |

|   |             |             |             |
|---|-------------|-------------|-------------|
| O | 15.14895344 | 22.06863693 | 17.77992862 |
| O | 13.09370758 | 23.22036655 | 18.96416380 |
| O | 11.63729877 | 8.27550278  | 15.48226981 |
| O | 14.06660463 | 7.14309420  | 15.42095728 |
| O | 13.78697199 | 11.78494610 | 14.95893510 |
| O | 2.62162192  | 8.73885038  | 14.82216142 |
| O | 4.73295665  | 5.79730142  | 17.85838892 |
| O | 2.52684056  | 5.18511072  | 16.43092249 |
| O | 2.50045567  | 2.23119010  | 17.85244643 |
| O | 13.35790787 | 5.58838148  | 18.15443534 |
| O | 14.00772264 | 21.25797273 | 14.44032947 |
| O | 15.08197790 | 19.32394955 | 16.00418655 |
| O | 3.44161750  | 20.58351627 | 16.43615187 |
| O | 3.54634405  | 16.42166226 | 18.82009237 |
| O | 5.24392903  | 18.11735307 | 17.61716773 |
| O | 3.14403177  | 14.94441649 | 16.65106931 |
| O | 14.37863086 | 17.55278432 | 18.66444723 |
| O | 1.35776749  | 0.74057784  | 12.44627611 |
| O | 3.02870937  | 0.54649033  | 14.65732905 |
| O | 2.69809560  | 3.77040205  | 13.55927820 |
| O | 4.69619815  | 3.21881227  | 15.25362335 |
| O | 7.27777388  | 0.33629949  | 18.88954978 |
| O | 5.06653484  | 1.01061575  | 17.46529049 |
| O | 8.98709446  | 20.78926378 | 18.50876511 |
| O | 6.88896435  | 22.12824569 | 17.25490340 |
| O | 18.13827177 | 13.92994785 | 15.18139948 |
| O | 15.63740442 | 14.66863357 | 16.00859282 |



|   |             |             |             |
|---|-------------|-------------|-------------|
| O | 19.91636286 | 16.82336403 | 16.35659913 |
| O | 17.70977048 | 17.96686122 | 15.24485823 |
| O | 21.03421889 | 14.79486814 | 18.43214742 |
| O | 18.66477280 | 14.59854126 | 19.40222266 |
| O | 19.26345641 | 10.15636640 | 17.26741454 |
| O | 17.31653076 | 11.85424878 | 17.69137049 |
| O | 20.04796315 | 21.21560419 | 14.81327627 |
| O | 18.57762651 | 19.78183162 | 12.96400698 |
| O | 22.07432702 | 23.83026861 | 14.81837095 |
| O | 21.32440675 | 23.08546645 | 12.36234361 |
| O | 24.05684142 | 19.23697128 | 15.40702578 |
| O | 24.51478017 | 21.60867848 | 16.68393262 |
| O | 22.26866559 | 17.45946625 | 18.28778877 |
| O | 21.81387795 | 19.71325514 | 17.05340259 |
| O | 18.53156108 | 8.67761759  | 14.74757133 |
| O | 20.30530959 | 7.46925654  | 13.11034895 |
| O | 20.57148552 | 12.24039192 | 15.39884442 |
| O | 21.99671099 | 11.38605479 | 13.18243164 |
| O | 22.34395072 | 15.19960946 | 15.71059475 |
| O | 23.82177741 | 14.20520141 | 13.55600893 |
| O | 26.94115707 | 15.34444297 | 15.40774789 |
| O | 14.45496982 | 12.98874942 | 18.14789354 |
| O | 24.17729655 | 11.77800111 | 16.52089794 |
| O | 25.63071104 | 11.51189719 | 18.73833887 |
| O | 20.92550919 | 2.68777845  | 14.21137242 |
| O | 22.64691757 | 0.67294750  | 13.40406150 |
| O | 22.85282347 | 6.65754085  | 13.02437671 |

|   |             |             |             |
|---|-------------|-------------|-------------|
| O | 24.82380894 | 4.85559194  | 12.59493353 |
| O | 13.22222677 | 0.73747716  | 17.26865067 |
| O | 26.50649067 | 3.03079654  | 15.40707480 |
| O | 27.42487215 | 23.48764859 | 17.19473288 |
| O | 22.50100289 | 1.20201441  | 16.88423191 |
| O | 24.38185403 | 9.41386997  | 14.06220566 |
| O | 26.91009654 | 9.48572674  | 13.32891354 |
| O | 26.14982772 | 12.71950908 | 13.03660107 |
| O | 16.09595375 | 10.30163843 | 15.03839811 |
| O | 17.79437718 | 7.00496862  | 17.34299093 |
| O | 15.64095199 | 8.48660073  | 17.62529901 |
| O | 15.44208299 | 4.31193005  | 17.26073283 |
| O | 26.59922753 | 8.27102533  | 16.59219825 |
| O | 28.72451964 | 23.96293382 | 13.71732800 |
| O | 19.24173623 | 19.11994530 | 19.40874985 |
| O | 17.98083153 | 20.65922283 | 17.70230582 |
| O | 16.68506866 | 16.36200741 | 18.30458440 |
| O | 3.40595915  | 19.12404613 | 19.41562242 |
| O | 16.37130010 | 5.65331861  | 14.59346370 |
| O | 18.59410815 | 4.49494445  | 13.78098096 |
| O | 19.79104103 | 1.81146303  | 17.10390905 |
| O | 17.44054018 | 2.56020678  | 16.42982903 |
| O | 21.64949068 | 22.81397335 | 17.48113834 |
| O | 19.37761788 | 24.09344331 | 16.66161564 |
| O | 4.34875926  | 12.31538959 | 11.99190583 |
| H | 1.99565867  | 13.78843588 | 12.89717208 |
| O | 5.98445767  | 15.75159125 | 12.37953214 |

|   |             |             |             |
|---|-------------|-------------|-------------|
| H | 6.47552067  | 14.84974269 | 12.28969241 |
| O | 6.76608182  | 13.32366160 | 12.44518739 |
| H | 5.79052980  | 13.33019027 | 12.27861382 |
| O | 27.98117559 | 15.41486384 | 12.22038471 |
| H | 28.54628431 | 15.51471460 | 11.44100634 |
| O | 6.74696176  | 13.26477373 | 19.76965502 |
| O | 5.53202056  | 8.47638156  | 19.11643010 |
| H | 4.53722879  | 4.64857993  | 22.01254210 |
| O | 5.49681574  | 4.78531076  | 22.07919229 |
| O | 2.33286177  | 7.12640533  | 18.29171255 |
| O | 8.28257028  | 19.78871132 | 13.26675556 |
| H | 7.79319412  | 19.48640610 | 12.47850609 |
| O | 10.73188864 | 21.05490434 | 14.43169496 |
| H | 6.99503110  | 22.43777821 | 10.98048019 |
| O | 7.56660973  | 21.74441925 | 10.52040880 |
| H | 6.95750407  | 21.12661724 | 10.09190078 |
| O | 12.44463207 | 20.19007424 | 17.61663653 |
| H | 12.12243129 | 20.15461798 | 18.58123883 |
| O | 11.58107188 | 20.25786070 | 20.07497329 |
| H | 12.32342426 | 20.19294258 | 20.68893892 |
| O | 9.78583965  | 15.66591053 | 17.54588685 |
| H | 9.68520653  | 16.47027537 | 18.11696547 |
| O | 7.21368019  | 16.22018038 | 18.30110956 |
| H | 8.05231618  | 15.74847875 | 18.09046232 |
| O | 9.49043743  | 13.31602347 | 20.51949901 |
| O | 6.44065803  | 6.86537385  | 11.91871294 |
| H | 5.78138179  | 8.18097823  | 11.42486568 |

|   |             |             |             |
|---|-------------|-------------|-------------|
| O | 8.84443731  | 10.69464351 | 12.15684767 |
| H | 9.36464357  | 11.50582543 | 11.94926058 |
| O | 10.03181010 | 7.33688326  | 12.30268846 |
| H | 9.81639676  | 8.21397025  | 11.94942627 |
| O | 5.32561664  | 9.08329338  | 11.18376771 |
| H | 4.37831933  | 8.92789053  | 11.35999274 |
| O | 9.01387284  | 8.62023929  | 19.04838319 |
| O | 6.59160656  | 4.09961675  | 19.40111391 |
| O | 23.56165309 | 3.16795587  | 20.59589110 |
| O | 5.21948542  | 1.54611294  | 20.07336180 |
| H | 22.98878765 | 2.86611357  | 21.33366834 |
| O | 10.35735385 | 13.11901125 | 12.28895410 |
| H | 9.91936764  | 13.81832468 | 11.77566044 |
| O | 12.05823348 | 16.56171894 | 13.40342004 |
| H | 12.68731363 | 15.75046474 | 13.25131501 |
| O | 13.63208914 | 14.53374484 | 13.26688828 |
| H | 14.54951594 | 14.86738548 | 13.23293929 |
| O | 17.11500622 | 13.05778860 | 11.19540715 |
| H | 17.38599644 | 12.13748060 | 11.04432713 |
| O | 13.41446689 | 14.00106202 | 20.51476009 |
| O | 11.10948647 | 9.83709001  | 19.63761750 |
| H | 9.92454791  | 9.02311803  | 19.35449886 |
| O | 10.45135770 | 9.42958048  | 22.74213866 |
| O | 13.41490494 | 8.35079074  | 20.08122246 |
| H | 12.58463731 | 8.87181444  | 20.15563860 |
| O | 10.19856469 | 0.74430281  | 13.63763332 |
| H | 10.40934883 | 1.62371981  | 13.25921093 |

|   |             |             |             |
|---|-------------|-------------|-------------|
| O | 7.27187414  | 3.64328290  | 12.15395378 |
| H | 6.54637712  | 4.14506038  | 11.74015795 |
| O | 11.64416325 | 3.29700311  | 13.62895683 |
| H | 12.50525074 | 3.59313384  | 13.12323734 |
| O | 14.42010062 | 1.55531782  | 19.40361779 |
| O | 14.76139916 | 21.47209180 | 20.28666825 |
| O | 13.00590862 | 8.07057040  | 13.11003142 |
| H | 12.50858972 | 9.02556126  | 12.96575255 |
| O | 11.90606016 | 10.30426830 | 12.88916165 |
| H | 11.01513896 | 10.10193233 | 12.56227300 |
| O | 2.48775448  | 8.27076193  | 12.29311933 |
| H | 1.86704219  | 8.21914655  | 11.55034678 |
| O | 27.24375417 | 5.93236249  | 14.29213509 |
| H | 26.66664223 | 6.60451952  | 13.88707464 |
| O | 26.82770332 | 3.70414256  | 18.07389885 |
| H | 26.50867520 | 21.24663382 | 23.24281583 |
| O | 16.30912188 | 7.93660901  | 22.15240089 |
| O | 15.65391323 | 19.25424926 | 13.47120561 |
| H | 7.43965073  | 0.56332050  | 12.91575729 |
| O | 10.54699021 | 24.16210052 | 12.14668857 |
| H | 7.21597699  | 0.53449767  | 11.39624070 |
| O | 11.07518263 | 20.92094894 | 11.70121014 |
| H | 11.10519192 | 20.80291524 | 10.73990960 |
| O | 5.55522631  | 17.62931412 | 20.15050997 |
| O | 16.02819834 | 17.02896528 | 20.89311582 |
| H | 15.29339687 | 13.92150073 | 20.74967120 |
| O | 6.99288736  | 23.49038061 | 12.36962679 |

|   |             |             |             |
|---|-------------|-------------|-------------|
| H | 24.76822390 | 3.24398231  | 12.26386259 |
| O | 4.97841960  | 2.43615263  | 12.75547244 |
| H | 5.90929206  | 2.71373446  | 12.46426989 |
| O | 25.15711841 | 2.34477198  | 12.43316711 |
| H | 23.88502775 | 4.28372973  | 13.91328440 |
| O | 6.58205247  | 20.92931534 | 19.56443520 |
| H | 19.95532768 | 15.91456919 | 24.09996550 |
| O | 3.94924184  | 21.05296386 | 22.21929927 |
| H | 4.38451538  | 20.17698348 | 22.30846498 |
| O | 16.53020804 | 15.32740839 | 13.54749618 |
| H | 16.41281238 | 12.95024334 | 11.87183337 |
| O | 19.19695585 | 16.43183710 | 13.71855247 |
| H | 23.90266758 | 16.93179693 | 13.12441867 |
| O | 20.69236542 | 13.27137322 | 20.73033395 |
| H | 24.03510611 | 13.85183571 | 22.74754246 |
| O | 18.43741876 | 10.64027836 | 19.85252300 |
| H | 17.97562945 | 9.73629810  | 19.74545620 |
| O | 20.92964485 | 7.26545700  | 18.81677971 |
| H | 20.65754293 | 7.99733888  | 19.39321977 |
| O | 15.33240251 | 10.63503736 | 20.29091410 |
| H | 14.71576269 | 9.88770880  | 20.43463394 |
| O | 17.45509967 | 8.21312699  | 19.70751659 |
| H | 16.95516974 | 8.10387090  | 20.56557244 |
| O | 21.18101282 | 20.33162848 | 12.51534673 |
| H | 21.31181981 | 21.33267432 | 12.36064110 |
| O | 23.71595399 | 22.27297972 | 13.47368929 |
| H | 29.07186033 | 24.27352565 | 9.76910390  |

|   |             |             |             |
|---|-------------|-------------|-------------|
| O | 17.78028936 | 2.89148135  | 10.36886127 |
| H | 17.88268396 | 3.34838394  | 9.52639822  |
| O | 26.39341959 | 19.65636184 | 16.59153470 |
| H | 5.44180737  | 10.78232222 | 22.28572372 |
| O | 22.05821037 | 19.78313659 | 19.71291856 |
| O | 19.69846663 | 16.88387844 | 21.10899419 |
| H | 20.28924582 | 16.25840649 | 21.57151863 |
| O | 23.46553490 | 14.11979199 | 22.00258891 |
| O | 18.63990379 | 9.42514858  | 12.21525721 |
| H | 18.70647667 | 9.14675819  | 11.28729954 |
| O | 19.42583266 | 12.11721466 | 13.03775889 |
| H | 19.38332613 | 11.27133038 | 12.54208773 |
| O | 22.34884604 | 9.08225363  | 11.17813788 |
| H | 21.94712961 | 9.92976369  | 10.93672476 |
| O | 21.78856151 | 9.27394507  | 15.92835331 |
| H | 22.45057251 | 8.79332716  | 16.50407673 |
| O | 22.12795964 | 6.25542709  | 15.91813236 |
| H | 22.69022689 | 6.55489193  | 15.18167145 |
| O | 19.96463197 | 5.03806113  | 16.44962199 |
| H | 20.76145030 | 5.60989400  | 16.29264755 |
| O | 23.50884603 | 3.83752031  | 14.73489861 |
| H | 24.00397875 | 4.31726993  | 15.49892786 |
| O | 21.95770950 | 4.37349527  | 18.58522826 |
| O | 18.39172971 | 3.62416517  | 18.65881121 |
| H | 22.44718356 | 3.95868018  | 19.32464614 |
| O | 22.38748791 | 16.50154737 | 13.46916907 |
| H | 22.03111955 | 19.36063016 | 11.02554671 |

|   |             |             |             |
|---|-------------|-------------|-------------|
| O | 24.89283411 | 17.16297207 | 12.96663212 |
| H | 24.88170491 | 18.00407526 | 12.48613614 |
| O | 22.03402218 | 18.51083273 | 10.52800262 |
| H | 22.93888417 | 18.36513794 | 10.21432560 |
| O | 28.26042698 | 18.09697543 | 14.07517836 |
| H | 28.19246012 | 18.39039701 | 13.15407764 |
| O | 25.10425908 | 16.41675557 | 16.96781153 |
| O | 23.56923858 | 13.19443889 | 18.73384174 |
| H | 23.27088817 | 9.07937675  | 18.44019350 |
| O | 22.23944050 | 10.43981760 | 19.25996409 |
| H | 21.60922116 | 9.82277103  | 19.65838279 |
| O | 23.67344911 | 8.47993149  | 17.77090371 |
| O | 21.83862472 | 2.36930550  | 11.62401038 |
| H | 21.48035499 | 3.39024954  | 11.49278534 |
| O | 20.90101844 | 4.70265830  | 11.48083545 |
| H | 19.98723197 | 4.45588548  | 11.25376563 |
| O | 23.85229294 | 6.45352118  | 10.59840706 |
| H | 24.36571684 | 7.16226998  | 10.17958776 |
| O | 24.79671087 | 4.63495743  | 16.80560883 |
| H | 26.10240482 | 0.78192516  | 24.52592907 |
| O | 23.78626424 | 0.88585188  | 19.26648984 |
| O | 24.52619103 | 23.35111533 | 19.26477850 |
| O | 4.88315898  | 23.28925658 | 19.78602224 |
| H | 4.03197210  | 23.65645725 | 20.06883462 |
| O | 24.95262657 | 9.82517886  | 11.48047245 |
| H | 24.02619237 | 9.50464024  | 11.22721148 |
| O | 24.42645682 | 13.66666858 | 10.66377759 |



|   |             |             |             |
|---|-------------|-------------|-------------|
| H | 24.65542280 | 13.41366865 | 9.76054780  |
| O | 14.87231696 | 11.04296018 | 12.66158840 |
| H | 14.58054431 | 10.12265231 | 12.53729087 |
| O | 10.52259963 | 4.91333387  | 10.80625195 |
| H | 10.61580805 | 3.95865718  | 10.68012826 |
| O | 14.69735429 | 4.10362765  | 19.92862378 |
| H | 14.50954415 | 3.12971511  | 19.76554968 |
| O | 0.26368138  | 0.33844310  | 25.03732670 |
| O | 26.69019038 | 22.95216963 | 11.18217311 |
| H | 26.49902069 | 22.43266277 | 10.38958715 |
| O | 27.42627178 | 21.33444005 | 14.44451981 |
| H | 27.11815125 | 20.63412098 | 15.04989725 |
| O | 29.43820978 | 23.16046032 | 11.26275643 |
| H | 28.49270625 | 22.83379635 | 11.30689675 |
| O | 25.31056650 | 0.67453168  | 9.26625498  |
| H | 25.91606412 | 1.36024366  | 8.94374300  |
| O | 17.40147814 | 22.48181081 | 15.03423962 |
| H | 16.55733374 | 22.78432955 | 14.66293854 |
| O | 17.55212690 | 20.86177860 | 20.43727371 |
| H | 16.58597936 | 20.95420918 | 20.59212264 |
| O | 26.79088982 | 19.85420084 | 19.62857773 |
| H | 26.09297835 | 19.19075871 | 19.51482224 |
| O | 11.30239798 | 14.20137448 | 24.66185564 |
| O | 16.25859119 | 13.78633447 | 20.65765719 |
| H | 13.15758852 | 13.34791433 | 21.28015419 |
| O | 14.18397576 | 2.42117488  | 15.03369267 |
| H | 14.19400249 | 2.39153940  | 14.06620848 |

|   |             |             |             |
|---|-------------|-------------|-------------|
| O | 16.77944361 | 1.34608940  | 13.32896845 |
| H | 16.17480505 | 2.09895143  | 13.43008732 |
| O | 16.54184374 | 4.70870346  | 12.00308079 |
| H | 17.05506148 | 4.05373418  | 11.43761839 |
| O | 13.64892974 | 4.51322367  | 12.66597412 |
| H | 14.49896591 | 4.32256344  | 12.23185838 |
| O | 19.48616242 | 23.03524874 | 19.03561829 |
| O | 21.37729836 | 21.26653715 | 22.22935845 |
| H | 22.19042404 | 21.36817006 | 21.67007231 |
| O | 16.01361589 | 2.35428126  | 22.22227614 |
| H | 15.19198181 | 2.81133416  | 21.97937314 |
| O | 1.31135174  | 2.70017723  | 20.29267185 |
| H | 0.59864818  | 3.30898432  | 20.66481082 |
| H | 29.01287083 | 19.45830475 | 25.22387988 |
| O | 25.23284603 | 8.55121531  | 21.41542707 |
| H | 26.15892473 | 8.50290693  | 21.76419889 |
| H | 24.64791384 | 8.48182370  | 22.20387517 |
| O | 28.69317120 | 18.58349388 | 25.55065663 |
| H | 2.64033103  | 17.92901313 | 25.01552483 |
| H | 4.05294933  | 24.18203850 | 24.36721736 |
| O | 9.63475869  | 19.51479151 | 21.62681209 |
| H | 10.38549321 | 19.83301906 | 21.00225210 |
| H | 10.12193049 | 19.10568939 | 22.36100852 |
| O | 7.86820988  | 21.20085426 | 22.66320623 |
| H | 8.54956546  | 20.62612361 | 22.18255238 |
| H | 7.60394834  | 20.62414396 | 23.41914917 |
| O | 28.66137035 | 21.66908686 | 18.96627415 |

|   |             |             |             |
|---|-------------|-------------|-------------|
| H | 27.47758969 | 16.21511362 | 21.07053345 |
| H | 28.76755459 | 22.58301208 | 18.64649254 |
| O | 5.24994708  | 18.57599034 | 22.59889564 |
| H | 5.99418713  | 18.77724838 | 23.21520164 |
| H | 4.69376567  | 17.89814476 | 23.06565906 |
| O | 19.49011769 | 11.44754453 | 24.22917991 |
| H | 18.81595023 | 10.80612926 | 23.87190888 |
| H | 20.35385070 | 11.16276995 | 23.87806222 |
| O | 23.61944810 | 12.58355615 | 24.58818115 |
| H | 23.34978097 | 13.34522663 | 25.14931564 |
| H | 24.45660239 | 12.21917174 | 24.95809144 |
| O | 25.93551138 | 4.37916541  | 21.11116419 |
| H | 25.88215261 | 4.75399462  | 22.01691322 |
| H | 25.04680725 | 3.95360068  | 20.94128115 |
| O | 2.61458095  | 12.58871822 | 19.40999838 |
| H | 1.96414456  | 13.28070068 | 19.61540218 |
| H | 5.61667242  | 14.65888801 | 22.96948388 |
| O | 4.95378359  | 14.75050351 | 22.21979049 |
| H | 10.40374992 | 13.28220077 | 23.82729249 |
| H | 4.68495933  | 13.81483794 | 21.98282160 |
| O | 3.26670061  | 0.73609928  | 21.70534285 |
| H | 2.49483356  | 1.18599044  | 21.31444211 |
| H | 3.49212858  | 1.26197950  | 22.52240867 |
| O | 14.35948886 | 17.21826665 | 24.44994446 |
| H | 13.54836939 | 17.59744050 | 24.02424676 |
| H | 14.07578324 | 16.34424911 | 24.82833916 |
| O | 8.71496138  | 4.10527806  | 22.43135214 |

|   |             |             |             |
|---|-------------|-------------|-------------|
| H | 9.38262794  | 4.48965463  | 21.82637611 |
| H | 23.63528801 | 2.35585857  | 20.02118620 |
| O | 2.57636743  | 9.49058459  | 25.55027171 |
| H | 3.51043818  | 9.17449137  | 25.47468260 |
| H | 2.48904896  | 10.12912375 | 24.80960327 |
| O | 9.19739217  | 3.23485488  | 25.55387271 |
| H | 10.04043374 | 3.38272623  | 26.02018878 |
| H | 8.88767403  | 4.15337653  | 25.32031250 |
| O | 8.07788750  | 10.43533028 | 20.95374708 |
| H | 7.48795594  | 10.74049700 | 20.21832372 |
| H | 8.28748850  | 9.52087324  | 20.65310156 |
| O | 9.97938120  | 18.09855580 | 18.50117136 |
| H | 18.47873825 | 15.94527861 | 24.59842250 |
| H | 10.16812837 | 18.53608908 | 19.35179756 |
| O | 15.85505459 | 2.22551889  | 24.74886575 |
| H | 15.91993541 | 2.26923031  | 23.68583921 |
| H | 16.72977322 | 2.54932098  | 25.04382546 |
| O | 1.35476786  | 8.61577910  | 22.29321818 |
| H | 1.68800622  | 9.52310816  | 22.54956924 |
| H | 27.81156341 | 8.13345799  | 23.14859679 |
| O | 8.87663756  | 1.42521123  | 21.25113720 |
| H | 8.53805573  | 0.50987895  | 21.29820939 |
| H | 4.48040141  | 1.20953539  | 20.64901987 |
| O | 11.27177873 | 4.97351917  | 21.10579400 |
| H | 11.65791947 | 4.31069297  | 21.70555389 |
| H | 11.37517269 | 5.87370342  | 21.61440610 |
| O | 14.57974576 | 5.37526460  | 22.28874634 |

|   |             |             |             |
|---|-------------|-------------|-------------|
| H | 15.56235911 | 5.28433865  | 22.37103722 |
| H | 14.41952722 | 4.89061339  | 21.42574420 |
| O | 9.77788431  | 12.65867760 | 23.26046967 |
| H | 10.31617720 | 9.49038021  | 23.71051170 |
| H | 9.50831011  | 13.19520333 | 22.48128648 |
| O | 12.40978011 | 16.49290927 | 20.66503289 |
| H | 12.73068855 | 15.55115522 | 20.74621164 |
| H | 8.54977555  | 13.05171258 | 20.36992322 |
| O | 19.32991877 | 16.41944184 | 24.66861045 |
| H | 5.41992122  | 18.08390137 | 21.02936654 |
| H | 13.21305830 | 17.00538453 | 20.86175293 |
| O | 10.97697411 | 22.94292277 | 21.63720268 |
| H | 11.66893029 | 22.35566610 | 22.00154727 |
| H | 10.38165358 | 23.14498684 | 22.40599855 |
| O | 6.78597749  | 1.67447520  | 23.48462673 |
| H | 6.54453167  | 0.68511037  | 23.58543586 |
| H | 6.04224985  | 2.10928362  | 23.94787553 |
| O | 18.52655601 | 3.48981007  | 24.81920149 |
| H | 19.00204274 | 2.72260528  | 24.40871600 |
| H | 19.07027770 | 3.77409009  | 25.56793141 |
| O | 13.75933199 | 9.89600560  | 23.11390542 |
| H | 16.77312267 | 10.11698631 | 24.00963981 |
| H | 16.81969262 | 7.18054772  | 22.48802565 |
| O | 11.62845198 | 7.12605109  | 22.52180644 |
| H | 10.87888661 | 8.50082603  | 22.58237816 |
| H | 11.32599168 | 6.82751101  | 23.39747043 |
| O | 22.71678977 | 5.12081866  | 23.10613397 |

|   |             |             |             |
|---|-------------|-------------|-------------|
| H | 22.01580977 | 5.71908279  | 23.44261813 |
| H | 22.82298008 | 5.46786475  | 22.18135224 |
| O | 25.14899997 | 22.54730051 | 22.82190779 |
| H | 24.60126876 | 23.22305931 | 23.25458975 |
| H | 24.55190960 | 22.09669080 | 22.16122837 |
| O | 15.30162567 | 12.71675994 | 23.40191450 |
| H | 14.35367592 | 12.57674124 | 22.99237900 |
| H | 15.31736844 | 12.14452271 | 24.18825027 |
| O | 16.69308511 | 15.40440417 | 23.63715506 |
| H | 16.30254112 | 14.50459149 | 23.66289588 |
| H | 15.93245976 | 16.01030598 | 23.75257898 |
| O | 10.12522764 | 0.07008908  | 24.37478484 |
| H | 14.12115330 | 21.43587290 | 21.03340034 |
| H | 11.02111825 | -0.11845600 | 24.69543617 |
| O | 20.82223536 | 23.90126359 | 22.30463473 |
| H | 21.03366018 | 22.93357589 | 22.17323820 |
| H | 20.33751055 | 23.87699343 | 23.19137713 |
| O | 24.94085930 | 1.81716911  | 23.33544538 |
| H | 23.95235065 | 1.87567606  | 23.31943035 |
| H | 25.22667666 | 2.73500189  | 23.47755292 |
| O | 17.37929632 | 9.96959645  | 23.25989918 |
| H | 14.22212900 | 10.03603652 | 23.96104394 |
| H | 16.73544427 | 8.78355431  | 22.61418362 |
| O | 25.68813987 | 15.41166826 | 24.44631710 |
| H | 19.53680890 | 13.26104982 | 21.74841016 |
| H | 24.77711898 | 15.29646029 | 24.82220049 |
| O | 18.70804614 | 13.32236473 | 22.37087144 |

|   |             |             |             |
|---|-------------|-------------|-------------|
| H | 19.01238053 | 12.84633255 | 23.18783245 |
| H | 25.99344777 | 14.54401346 | 24.13057669 |
| O | 27.37192366 | 22.61543960 | 21.25239700 |
| H | 26.65407748 | 22.91168300 | 21.85467002 |
| H | 28.00089993 | 23.35050224 | 21.14513387 |
| O | 7.29565477  | 23.49093359 | 25.56286356 |
| H | 8.19308678  | 23.50443634 | 25.05450018 |
| H | 7.20922007  | 24.35335709 | 26.00081317 |
| O | 20.38324380 | 9.22236028  | 21.40940566 |
| H | 20.81963966 | 9.95485786  | 21.88371301 |
| H | 19.63468616 | 9.66665434  | 20.94820953 |
| O | 19.69320484 | 5.11820700  | 21.41427654 |
| H | 20.03100043 | 5.77192697  | 22.06301239 |
| H | 18.78062101 | 4.88572259  | 21.75146176 |
| O | 9.18808673  | 18.29970864 | 25.77234144 |
| H | 9.52968560  | 17.59491128 | 25.17071355 |
| H | 9.97356516  | 18.83815321 | 26.00493838 |
| O | 15.39404312 | 10.03173405 | 25.55519483 |
| H | 15.00422700 | 10.68960465 | 26.16676763 |
| H | 14.92821352 | 9.18117046  | 25.69401819 |
| O | 1.49363901  | 4.64496505  | 24.81844259 |
| H | 0.52718312  | 4.56910326  | 24.70858136 |
| H | 1.83304716  | 4.65631709  | 23.88687233 |
| O | 2.33888470  | 2.08680753  | 25.92586565 |
| H | 2.00620425  | 3.00336241  | 25.81749171 |
| H | 1.55824960  | 1.51798316  | 25.71541600 |
| O | 23.75115742 | 21.40591556 | 20.81154930 |

|   |             |             |             |
|---|-------------|-------------|-------------|
| H | 23.91794026 | 22.20368569 | 20.19068908 |
| H | 23.16585110 | 20.74535059 | 20.28761443 |
| O | 22.17655841 | 11.03045897 | 22.89583030 |
| H | 22.59593743 | 11.63698820 | 23.57201760 |
| H | 22.62933526 | 10.16679498 | 23.08910857 |
| O | 22.21754041 | 18.16876227 | 22.82084066 |
| H | 22.08832895 | 18.54162546 | 23.74975846 |
| H | 23.12466744 | 18.41120234 | 22.50245861 |
| O | 27.16843416 | 20.52675535 | 23.18613477 |
| H | 26.74272363 | 19.76370098 | 23.61452562 |
| H | 24.65493798 | 0.75802204  | 19.72383796 |
| O | 13.77026163 | 14.54148201 | 25.18543169 |
| H | 14.22348363 | 14.13526625 | 24.42328450 |
| H | 12.72956567 | 14.41249464 | 24.95414728 |
| O | 18.44216585 | 7.87370896  | 24.66271797 |
| H | 18.49232193 | 8.18314665  | 25.57948209 |
| H | 18.11664328 | 8.67848357  | 24.14805690 |
| O | 11.56067132 | 22.34530688 | 24.88886041 |
| H | 11.90328202 | 21.88184548 | 24.10066738 |
| H | 12.69286964 | 23.58090389 | 24.71927426 |
| O | 25.01607376 | 11.43520405 | 21.26976516 |
| H | 25.12188873 | 10.46294774 | 21.38055974 |
| H | 25.38140973 | 11.55564977 | 19.71200808 |
| O | 13.08301594 | 21.06651786 | 22.59461610 |
| H | 11.00547668 | 13.89525373 | 25.53566691 |
| H | 13.92443216 | 21.20206873 | 23.11280412 |
| O | 27.02347170 | 15.41181130 | 20.73351923 |



|   |             |             |             |
|---|-------------|-------------|-------------|
| H | 12.78447960 | 20.14796322 | 22.79396207 |
| H | 25.42554347 | 15.81404432 | 20.48042384 |
| O | 6.15769336  | 10.36578978 | 22.81484539 |
| H | 6.92942405  | 10.37334041 | 22.16606664 |
| H | 24.82256675 | 24.10097013 | 19.80344929 |
| O | 8.50717841  | 15.41673304 | 21.64220120 |
| H | 9.02344530  | 14.60996584 | 21.20306856 |
| H | 8.19515368  | 15.12199676 | 22.52503705 |
| O | 9.41178739  | 23.35920015 | 23.99234855 |
| H | 8.89659219  | 22.67978786 | 23.51032847 |
| H | 10.62008155 | 22.73672764 | 24.57462243 |
| O | 23.32013369 | 8.55546337  | 23.48453278 |
| H | 23.87611566 | 8.62553892  | 24.32122411 |
| H | 22.54203422 | 7.99399817  | 23.66804693 |
| O | 3.74027935  | 16.68665817 | 23.85224287 |
| H | 4.42380250  | 16.64969117 | 24.58664553 |
| H | 3.91931279  | 15.87923249 | 23.30934840 |
| O | 27.49741463 | 15.61267163 | 18.07676094 |
| H | 27.24319832 | 15.42933771 | 19.76114612 |
| H | 2.10496863  | 11.72557698 | 19.46088429 |
| O | 14.38542119 | 12.45522476 | 26.81535697 |
| H | 14.18116118 | 13.28464249 | 26.27581154 |
| H | 14.86985819 | 12.77441639 | 27.59190647 |
| O | 11.51141580 | 11.90693415 | 26.96625554 |
| H | 12.48310739 | 12.03189836 | 27.02582823 |
| H | 11.20101804 | 11.93108099 | 27.88386397 |
| O | 2.26665330  | 11.09232219 | 23.04038961 |

|   |             |             |             |
|---|-------------|-------------|-------------|
| H | 3.04052249  | 11.43472822 | 22.56461763 |
| H | 28.03183399 | 11.75071835 | 22.86112176 |
| O | 7.52889504  | 10.15074921 | 26.44937938 |
| H | 7.42329417  | 10.95813861 | 25.89901521 |
| H | 6.81457364  | 9.55223737  | 26.15055959 |
| O | 13.35440774 | 0.66402277  | 24.06884153 |
| H | 16.98697017 | 24.42021865 | 23.33857092 |
| H | 14.08059937 | 0.98782237  | 24.63146838 |
| O | 13.19341869 | 6.18756103  | 9.48730060  |
| H | 13.99928787 | 5.64467899  | 9.49916219  |
| H | 12.49950829 | 5.60846979  | 9.11934874  |
| O | 27.82582648 | 10.29114415 | 19.33763660 |
| H | 27.64025304 | 9.76235715  | 20.12870675 |
| H | 26.95939473 | 10.71802700 | 19.03930259 |
| O | 26.72088532 | 12.58585856 | 22.74049767 |
| H | 26.95651429 | 13.43267028 | 22.32846781 |
| H | 25.74521947 | 11.92201896 | 21.88551519 |
| O | 8.47794713  | 5.65838577  | 24.38587621 |
| H | 8.56189670  | 5.06964060  | 23.51265446 |
| H | 7.50912558  | 5.79425060  | 24.52656908 |
| O | 3.38426083  | 21.19047163 | 24.73325178 |
| H | 30.06589071 | 21.14406591 | 23.68114966 |
| H | 29.31405151 | 21.92586377 | 24.89014728 |
| O | 15.48358719 | 21.25358238 | 23.78195941 |
| H | 16.09330387 | 21.99691956 | 23.64445808 |
| H | 15.88756794 | 20.46909779 | 23.32581403 |
| O | 7.03719553  | 7.53572213  | 21.99141664 |

|   |             |             |             |
|---|-------------|-------------|-------------|
| H | 6.74932382  | 8.37511237  | 22.38899342 |
| H | 7.63583421  | 7.11558118  | 22.63347710 |
| O | 22.58093287 | 21.46437191 | 24.51790630 |
| H | 23.52123630 | 21.30797489 | 24.34423773 |
| H | 21.80360319 | 21.32719834 | 23.17829966 |
| O | 28.23217817 | 17.83808214 | 21.85782302 |
| H | 27.62235764 | 17.80035095 | 22.64506381 |
| H | 29.06009976 | 17.45987335 | 22.20023562 |
| O | 24.44391501 | 16.01488742 | 20.36921530 |
| H | 24.37199814 | 16.95966492 | 20.61955557 |
| H | 23.91821565 | 14.85186589 | 21.49793765 |
| O | 25.97196864 | 0.74095003  | 20.89843898 |
| H | 26.66574652 | 1.35531920  | 20.55308961 |
| H | 25.64972010 | 1.16963204  | 21.72795540 |
| O | 14.61785641 | 4.71316816  | 25.03551977 |
| H | 14.43697905 | 4.79965620  | 24.07055720 |
| H | 15.06948511 | 3.83346256  | 25.09518540 |
| O | 25.05448979 | 8.88655892  | 25.48137445 |
| H | 25.83880094 | 8.29789504  | 25.42556058 |
| H | 25.42678110 | 9.78568299  | 25.32654036 |
| O | 11.67382961 | 19.84282629 | 25.93658623 |
| H | 11.55910860 | 20.81151550 | 25.74559503 |
| H | 12.59613269 | 19.74975645 | 26.27493471 |
| O | 17.27423444 | 4.64456846  | 22.51920502 |
| H | 16.88377598 | 3.72077676  | 22.29267032 |
| H | 17.59924207 | 4.51996892  | 23.43464323 |
| O | 13.96931066 | 7.53161671  | 24.96574926 |

|   |             |             |             |
|---|-------------|-------------|-------------|
| H | 13.01137301 | 7.44466673  | 25.12918123 |
| H | 14.34172003 | 6.66317357  | 25.22911378 |
| O | 5.26124081  | 8.61836975  | 25.03773197 |
| H | 5.37577901  | 7.66761174  | 24.77738843 |
| H | 5.50292582  | 9.13079083  | 24.23991799 |
| O | 12.84118111 | 12.37458283 | 22.44561688 |
| H | 12.38495015 | 12.84985902 | 23.16590767 |
| H | 13.37616317 | 10.78262923 | 22.85694774 |
| O | 22.27595281 | 23.62846610 | 25.70580954 |
| H | 22.45277043 | 22.66674940 | 25.25548592 |
| H | 22.58302322 | 23.57896806 | 26.62212307 |
| O | 16.25248204 | 18.77755421 | 22.81695086 |
| H | 16.15437818 | 18.19104118 | 21.97394532 |
| H | 15.73101694 | 18.27885558 | 23.47671212 |
| O | 17.53462798 | 23.42970593 | 21.63749868 |
| H | 17.79889556 | 22.51588043 | 21.38644839 |
| H | 16.79060011 | 23.61302288 | 21.00649365 |
| O | 23.07930043 | 15.14178165 | 25.33682748 |
| H | 22.63826940 | 15.72888445 | 26.01316004 |
| H | 22.48844971 | 15.25260558 | 24.55554678 |
| O | 22.97420532 | 6.53520584  | 20.66135506 |
| H | 23.60252655 | 7.27030178  | 20.79621600 |
| H | 22.17568979 | 6.93504450  | 20.22630828 |
| O | 22.20970617 | 2.35463450  | 22.96667161 |
| H | 22.11749170 | 3.31754462  | 23.15058020 |
| H | 21.34066735 | 1.93335206  | 23.16443554 |
| O | 5.69469270  | 20.92908110 | 26.37166288 |

|   |             |             |             |
|---|-------------|-------------|-------------|
| H | 4.85666967  | 21.13347703 | 25.89061683 |
| H | 6.19541008  | 21.76731659 | 26.41557412 |
| O | 4.63748210  | 12.25465679 | 21.25518386 |
| H | 5.45621424  | 12.46466512 | 20.70447783 |
| H | 3.90695181  | 12.31168497 | 20.58363718 |
| O | 11.93192370 | 4.36901603  | 25.77713038 |
| H | 11.55330188 | 5.28311530  | 25.76374087 |
| H | 12.90883897 | 4.48954929  | 25.73077305 |
| O | 18.99549481 | 7.06783422  | 10.22066708 |
| H | 18.40685363 | 6.84530965  | 10.99158047 |
| H | 18.53760962 | 6.72747508  | 9.43862430  |
| O | 10.28341969 | 16.49249672 | 23.85476965 |
| H | 9.85382587  | 16.28381677 | 23.00236639 |
| H | 10.67096336 | 15.60401084 | 24.20398542 |
| O | 24.63665895 | 18.64101002 | 21.63582217 |
| H | 25.37192556 | 18.56678446 | 22.27003340 |
| H | 24.71805100 | 19.52682982 | 21.22507778 |
| O | 21.43371386 | 15.55811707 | 23.05080228 |
| H | 21.86954434 | 16.43777425 | 22.91650131 |
| H | 21.97761511 | 14.90428488 | 22.54637549 |
| O | 25.38445374 | 5.24944381  | 23.84553617 |
| H | 25.66412432 | 6.16523732  | 24.01926406 |
| H | 24.39813618 | 5.29113308  | 23.74112882 |
| O | 2.52946999  | 4.65435541  | 22.22289468 |
| H | 2.68791480  | 5.49208294  | 21.69544093 |
| H | 2.27394557  | 3.99838984  | 21.54719918 |
| O | 19.63961793 | 23.75556048 | 24.73784827 |

|   |             |             |             |
|---|-------------|-------------|-------------|
| H | 16.22141898 | 0.47552043  | 24.88851200 |
| H | 20.45405219 | 23.63056639 | 25.27827824 |
| O | 10.09989994 | 9.49700802  | 25.70310637 |
| H | 9.16254059  | 9.67114161  | 25.99520914 |
| H | 10.62552338 | 10.22497597 | 26.09087582 |
| O | 6.87952819  | 14.74988177 | 24.01465404 |
| H | 6.68664499  | 15.29348990 | 24.80340446 |
| H | 7.04486428  | 13.80552941 | 24.33063264 |
| O | 25.62365883 | 6.45394684  | 19.03520738 |
| H | 25.87659954 | 5.87591416  | 19.78630121 |
| H | 25.75585316 | 7.37606477  | 19.31653283 |
| O | 3.26116790  | 6.93233105  | 20.81726845 |
| H | 2.83943322  | 7.08233421  | 19.89494809 |
| H | 2.89020835  | 7.65999647  | 21.35782499 |
| O | 12.03422347 | 18.56995750 | 23.55529662 |
| H | 11.84269294 | 19.00334702 | 24.43433798 |
| H | 11.44930211 | 17.75952351 | 23.53983752 |
| O | 19.69784169 | 1.14574976  | 23.70779614 |
| H | 19.58153325 | 0.55960054  | 24.51129821 |
| H | 19.07215015 | 0.74827293  | 23.05602005 |
| O | 3.99626638  | 2.35267112  | 23.78368801 |
| H | 3.82217908  | 3.24956927  | 23.44491132 |
| H | 3.38840372  | 2.23343832  | 24.56989674 |
| O | 5.45945750  | 23.08258256 | 23.71579849 |
| H | 4.93825749  | 22.35501310 | 24.10882217 |
| H | 6.17275507  | 23.29511763 | 24.39888753 |
| O | 14.49533654 | 19.45324632 | 26.29973322 |

|   |             |             |             |
|---|-------------|-------------|-------------|
| H | 14.55978429 | 18.62557749 | 25.77536685 |
| H | 14.93844806 | 20.12524790 | 25.75314275 |
| O | 7.03856404  | 19.31430931 | 24.60241443 |
| H | 6.59124851  | 19.88883660 | 25.28172550 |
| H | 7.90470698  | 19.00589957 | 25.02645177 |
| O | 27.45648299 | 7.47435926  | 24.88704882 |
| H | 1.55455160  | 8.16810575  | 25.23458080 |
| H | 1.31123822  | 6.59777719  | 25.07607918 |
| O | 4.33142719  | 18.37139536 | 27.63109252 |
| H | 4.77514371  | 19.23811742 | 27.58843133 |
| H | 3.48045953  | 18.50599011 | 27.16670754 |
| O | 5.68574270  | 16.89099813 | 25.70327931 |
| H | 5.26603598  | 17.27105162 | 26.52067735 |
| H | 6.22948584  | 17.63633076 | 25.36755907 |
| O | 11.79888694 | 2.89455988  | 23.40881753 |
| H | 12.44163291 | 2.16092266  | 23.56778483 |
| H | 11.86965013 | 3.48412418  | 24.20876439 |
| O | 21.54966771 | 19.24059037 | 25.18838251 |
| H | 21.99586807 | 20.17129191 | 25.04737374 |
| H | 20.59891681 | 19.41081068 | 25.06566793 |
| O | 18.94233192 | 18.97246016 | 23.47814830 |
| H | 19.06861353 | 18.07981883 | 23.88923895 |
| H | 17.97201585 | 18.97525533 | 23.26257748 |
| O | 7.42818146  | 12.23737428 | 24.51826933 |
| H | 6.90985317  | 11.64698172 | 23.91487681 |
| H | 8.34104366  | 12.27842565 | 24.10900021 |
| O | 20.69096784 | 7.13975348  | 23.26147500 |

|   |             |             |             |
|---|-------------|-------------|-------------|
| H | 20.56536759 | 7.82191950  | 22.55322510 |
| H | 19.94202242 | 7.34962261  | 23.88833016 |
| O | 5.71157849  | 5.91780788  | 24.36456739 |
| H | 5.60318080  | 5.45580567  | 23.39921859 |
| H | 5.28913704  | 5.31291601  | 24.99220157 |
| O | 21.52379255 | 16.83243467 | 26.74812922 |
| H | 20.65653558 | 16.58100746 | 26.37711536 |
| H | 21.66180505 | 17.73515810 | 26.38287929 |
| O | 26.46767945 | 17.89367004 | 23.93594194 |
| H | 26.13334267 | 16.95959645 | 24.09757482 |
| H | 27.08166234 | 18.07520557 | 24.68940364 |
| O | 10.70266437 | 6.79915571  | 25.40856011 |
| H | 10.53004838 | 7.73011490  | 25.68668478 |
| H | 9.83079774  | 6.47547237  | 25.04695783 |
| O | 18.67692938 | 16.41754324 | 11.19080310 |
| H | 18.15699403 | 20.53207429 | 12.51537260 |
| H | 18.46792280 | 16.31757982 | 10.25005659 |
| O | 26.13439753 | 11.51230347 | 25.04281491 |
| H | 26.80389936 | 11.70377811 | 25.71661954 |
| H | 26.42627680 | 12.00645934 | 24.20020824 |
| C | 13.85571743 | 14.84299070 | 10.60354561 |
| O | 13.11848962 | 13.93426976 | 10.43477737 |
| O | 14.59911821 | 15.75027054 | 10.66084878 |

## **2-TS**

|    |            |             |             |
|----|------------|-------------|-------------|
| Si | 3.54407854 | 12.17786390 | 13.35841998 |
| Si | 6.07506351 | 16.28777416 | 13.91048375 |
| Si | 6.63303150 | 12.59261682 | 18.27318144 |



|    |             |             |             |
|----|-------------|-------------|-------------|
| Si | 5.46233404  | 9.65632095  | 18.04766580 |
| Si | 7.28913053  | 19.03482374 | 14.57908378 |
| Si | 10.43026190 | 22.43170938 | 15.26401041 |
| Si | 5.98267909  | 6.50329570  | 13.41792922 |
| Si | 8.47092723  | 10.71988731 | 13.83013142 |
| Si | 9.20096007  | 7.20405424  | 18.18113383 |
| Si | 7.81516546  | 4.48372067  | 18.38138009 |
| Si | 10.03531578 | 13.42465185 | 13.97795256 |
| Si | 12.36315219 | 17.35179633 | 14.80929777 |
| Si | 13.14331444 | 13.41079430 | 18.98112299 |
| Si | 11.67748212 | 10.74400294 | 18.41947456 |
| Si | 9.04328793  | 0.72667192  | 14.91957290 |
| Si | 11.14569337 | 4.52383953  | 14.69765691 |
| Si | 12.93522304 | 1.14908322  | 18.84963564 |
| Si | 14.61190097 | 22.74534748 | 19.16923408 |
| Si | 12.71032144 | 7.45476835  | 14.63646587 |
| Si | 1.97965530  | 9.37535961  | 13.50000774 |
| Si | 3.10671701  | 5.80264628  | 17.83964682 |
| Si | 1.73512443  | 3.29772012  | 18.76262937 |
| Si | 14.47070058 | 19.67630904 | 14.50163441 |
| Si | 4.35471247  | 17.91023038 | 18.95139374 |
| Si | 2.45851763  | 16.11004522 | 17.53047112 |
| Si | 5.79849989  | 24.12249607 | 13.23019909 |
| Si | 4.31175017  | 3.64353037  | 13.69605273 |
| Si | 5.69336860  | 0.45954113  | 18.85667859 |
| Si | 7.66815447  | 21.71549188 | 18.61089945 |
| Si | 16.59409730 | 14.23917417 | 14.78448132 |

|    |             |             |             |
|----|-------------|-------------|-------------|
| Si | 19.19848404 | 17.36870650 | 15.03698615 |
| Si | 20.08738243 | 13.80710657 | 19.33811238 |
| Si | 18.69351969 | 11.25029982 | 18.29637034 |
| Si | 20.06934312 | 20.07246111 | 13.72084063 |
| Si | 22.61968059 | 23.43151339 | 13.32385557 |
| Si | 24.80666094 | 19.98337929 | 16.66509229 |
| Si | 22.61486230 | 19.04782008 | 18.35689700 |
| Si | 18.82943214 | 8.10266308  | 13.27842189 |
| Si | 20.95266534 | 12.38792502 | 13.82761417 |
| Si | 22.55284771 | 14.96220927 | 14.09998100 |
| Si | 26.28311575 | 15.32190097 | 16.89577976 |
| Si | 24.73964040 | 12.57414149 | 17.79786410 |
| Si | 21.39466929 | 1.65131719  | 13.06501543 |
| Si | 24.25014091 | 6.31033298  | 12.27970278 |
| Si | 25.76701075 | 3.34194242  | 16.84424504 |
| Si | 23.86965260 | 0.76617056  | 17.59145824 |
| Si | 25.41107496 | 9.04981033  | 12.89533421 |
| Si | 15.20510731 | 11.42313557 | 14.30612700 |
| Si | 16.65703481 | 7.51108962  | 18.41153288 |
| Si | 14.81399880 | 5.07278808  | 18.57015955 |
| Si | 29.96947920 | 23.74042035 | 12.73837767 |
| Si | 17.83065610 | 19.84286311 | 19.11468737 |
| Si | 15.86564365 | 17.31961155 | 19.32909819 |
| Si | 17.32866976 | 5.38249425  | 13.30435321 |
| Si | 18.39389874 | 2.30757567  | 17.76067580 |
| Si | 20.40780978 | 23.77162981 | 17.89486291 |
| Ca | 6.63293011  | 12.99335091 | 14.90141499 |

|    |             |             |             |
|----|-------------|-------------|-------------|
| Ca | 4.87048666  | 9.71318963  | 15.02133952 |
| Ca | 3.30442454  | 12.44803408 | 16.90878014 |
| Ca | 5.38304591  | 15.64094667 | 16.87360933 |
| Ca | 10.25888122 | 19.77318307 | 16.80339702 |
| Ca | 8.91514743  | 16.42511502 | 15.51680344 |
| Ca | 7.46175038  | 18.63476465 | 18.42385691 |
| Ca | 10.76865136 | 22.30042791 | 19.24761883 |
| Ca | 9.52001248  | 7.36883926  | 14.68240705 |
| Ca | 7.59086642  | 3.89027577  | 14.71745833 |
| Ca | 6.42844583  | 6.86349011  | 16.53255976 |
| Ca | 8.43890752  | 10.07116415 | 17.10231336 |
| Ca | 13.33430889 | 14.01924175 | 15.86479209 |
| Ca | 11.66453785 | 10.59492399 | 15.37818266 |
| Ca | 9.98777118  | 13.44073160 | 18.15105889 |
| Ca | 12.09155285 | 16.74859546 | 18.20982721 |
| Ca | 11.95644375 | 1.82480919  | 15.74922280 |
| Ca | 13.11689596 | 22.30050012 | 16.59590466 |
| Ca | 9.38772030  | 1.38972421  | 18.90792741 |
| Ca | 11.34173243 | 4.52380985  | 18.65642500 |
| Ca | 2.93907333  | 6.42987181  | 14.37114727 |
| Ca | 2.27963557  | 2.72428146  | 15.60738394 |
| Ca | 12.83775748 | 7.75903729  | 17.90181763 |
| Ca | 1.90900486  | 9.34245783  | 17.09529844 |
| Ca | 3.81890988  | 18.77546818 | 15.25719786 |
| Ca | 26.81986578 | 12.74786202 | 15.06256687 |
| Ca | 14.53210502 | 19.79218446 | 18.19280239 |
| Ca | 4.42394107  | 21.34154173 | 18.38263720 |

|    |             |             |             |
|----|-------------|-------------|-------------|
| Ca | 5.32144239  | 0.96178537  | 15.13785948 |
| Ca | 5.52292818  | 21.88496771 | 15.48863462 |
| Ca | 5.86224145  | 24.19912073 | 17.86205097 |
| Ca | 5.07068207  | 3.47283243  | 17.73162049 |
| Ca | 20.20069612 | 14.42678420 | 16.20964350 |
| Ca | 18.25681491 | 11.23427673 | 15.35710060 |
| Ca | 16.58091599 | 14.01331830 | 18.31325484 |
| Ca | 19.83326276 | 16.83001675 | 18.73864201 |
| Ca | 22.49571011 | 21.36637557 | 15.53647510 |
| Ca | 22.30015080 | 17.63272176 | 15.75188817 |
| Ca | 20.46078867 | 20.94645012 | 18.39457966 |
| Ca | 23.80446789 | 23.90829042 | 17.16791477 |
| Ca | 22.17066625 | 9.06383029  | 13.66286961 |
| Ca | 20.87554078 | 5.17107477  | 13.86951173 |
| Ca | 19.93071659 | 8.05643212  | 16.71297550 |
| Ca | 21.87041770 | 11.25145275 | 17.11490390 |
| Ca | 26.19886978 | 17.74926165 | 15.19290672 |
| Ca | 24.20355830 | 12.11659251 | 12.40842532 |
| Ca | 23.29271174 | 15.40722432 | 18.11623377 |
| Ca | 28.32914414 | 19.51157444 | 17.73405933 |
| Ca | 24.55012935 | 1.60202740  | 14.54970230 |
| Ca | 25.97559503 | 22.52063969 | 13.35992629 |
| Ca | 21.57957107 | 3.22643456  | 16.61392446 |
| Ca | 26.85940306 | 6.23842710  | 16.75110639 |
| Ca | 16.21219592 | 8.02729591  | 15.41554984 |
| Ca | 14.24803478 | 4.84811307  | 15.20763362 |
| Ca | 25.05110503 | 9.62839201  | 16.30923674 |

|    |             |             |             |
|----|-------------|-------------|-------------|
| Ca | 15.14145939 | 10.71854872 | 18.03383804 |
| Ca | 17.24209566 | 20.17711041 | 15.46623786 |
| Ca | 15.56480887 | 16.97165883 | 16.37268033 |
| Ca | 28.96730845 | 22.52746109 | 15.75844192 |
| Ca | 17.43727055 | 22.90575221 | 17.48081980 |
| Ca | 18.73052884 | 2.09338093  | 14.68077146 |
| Ca | 19.63699110 | 23.50254771 | 14.50051430 |
| Ca | 15.29170287 | 2.02028829  | 17.01016221 |
| Ca | 17.62508332 | 4.88981044  | 16.48190690 |
| Ca | 10.71285503 | 19.15881768 | 13.27812058 |
| Ca | 5.73638021  | 6.49775348  | 20.12956382 |
| Ca | 6.26659179  | 11.19910474 | 11.70624666 |
| Ca | 6.48951902  | 15.39358841 | 20.34026828 |
| Ca | 12.73141309 | 12.48248744 | 12.75037849 |
| Ca | 6.90629819  | 3.02793855  | 21.34253643 |
| Ca | 8.55504867  | 5.58781964  | 11.89526709 |
| Ca | 10.75055521 | 11.33026643 | 21.39374043 |
| Ca | 26.89114202 | 3.95787425  | 13.22118783 |
| Ca | 9.45130817  | 2.13059374  | 23.34725037 |
| Ca | 12.59479477 | 22.13749310 | 12.98069141 |
| Ca | 13.80448636 | 7.69465974  | 22.15177521 |
| Ca | 8.85659578  | 22.22832628 | 12.59147775 |
| Ca | 17.69148037 | 15.44091607 | 21.35029032 |
| Ca | 2.46949485  | 15.82010926 | 14.31665029 |
| Ca | 5.99928119  | 22.25529357 | 21.46710586 |
| Ca | 20.71780402 | 17.13808991 | 12.16535377 |
| Ca | 16.79508225 | 11.68517061 | 21.55137530 |

|    |             |             |             |
|----|-------------|-------------|-------------|
| Ca | 18.61691175 | 14.43717535 | 12.73522530 |
| Ca | 20.40971940 | 19.06975805 | 21.45599514 |
| Ca | 25.78224996 | 14.68253492 | 12.22853206 |
| Ca | 19.87742102 | 5.22142263  | 19.05552078 |
| Ca | 21.47564581 | 6.97199350  | 11.09835369 |
| Ca | 22.72468272 | 12.17235175 | 20.65768004 |
| Ca | 12.12313386 | 6.16353193  | 11.83048246 |
| Ca | 26.27282372 | 21.93057722 | 18.68550110 |
| Ca | 23.77906578 | 1.03152804  | 11.22912302 |
| Ca | 23.31595981 | 6.25902182  | 17.96082114 |
| Ca | 17.94187226 | 1.01012376  | 11.39806097 |
| Ca | 28.55105262 | 20.33282806 | 21.02519905 |
| Ca | 16.99868486 | 17.46250214 | 12.91879120 |
| Ca | 16.17997909 | 0.66776817  | 20.64524790 |
| O  | 2.60364283  | 10.82559648 | 13.18279736 |
| O  | 7.23221317  | 17.54249060 | 13.86635571 |
| O  | 6.37124314  | 10.96530811 | 18.66415710 |
| O  | 11.82790667 | 23.32681980 | 14.73795069 |
| O  | 4.94349463  | 5.12287599  | 13.33463354 |
| O  | 8.90128099  | 12.25344937 | 14.36512103 |
| O  | 8.02832000  | 6.13117380  | 18.74682190 |
| O  | 13.08089457 | 18.77644875 | 14.22304782 |
| O  | 12.06910368 | 12.16153893 | 19.26380966 |
| O  | 11.99395771 | 5.93151769  | 14.28131511 |
| O  | 15.73746043 | 23.88659399 | 19.63298246 |
| O  | 2.72592013  | 4.57116404  | 19.02843210 |
| O  | 4.62214184  | 22.81534261 | 13.48193207 |

|   |             |             |             |
|---|-------------|-------------|-------------|
| O | 2.29039974  | 17.50464786 | 16.72979905 |
| O | 8.14148240  | 23.21808913 | 19.33131847 |
| O | 16.13806780 | 12.77657963 | 14.07065600 |
| O | 20.34656250 | 18.57871243 | 14.36490749 |
| O | 19.85361729 | 12.45679603 | 18.30948526 |
| O | 20.00059324 | 0.71853165  | 12.66809191 |
| O | 24.22857679 | 19.38172611 | 18.14621997 |
| O | 17.73456535 | 6.94505809  | 12.73567108 |
| O | 21.10356750 | 14.06195377 | 13.56020941 |
| O | 25.76311136 | 13.79308332 | 17.26480703 |
| O | 25.45667082 | 7.42467758  | 12.51948202 |
| O | 25.02273674 | 1.87886347  | 17.10825593 |
| O | 15.86193641 | 6.24284301  | 19.10733056 |
| O | 16.49653737 | 18.90579590 | 19.03509745 |
| O | 17.67610509 | 1.01001222  | 18.60079299 |
| O | 4.44168829  | 12.05245995 | 14.72258845 |
| O | 2.50095087  | 13.45983984 | 13.69704091 |
| O | 6.72425531  | 15.28766461 | 15.04620071 |
| O | 4.64392413  | 16.75769375 | 14.51704625 |
| O | 8.00884652  | 12.52622783 | 17.39225222 |
| O | 5.51429580  | 13.32050881 | 17.33285197 |
| O | 6.31461965  | 9.21420295  | 16.67710264 |
| O | 4.07484506  | 10.23168064 | 17.41098916 |
| O | 8.16936540  | 18.90938847 | 15.92601429 |
| O | 5.90362192  | 19.79803724 | 14.59355193 |
| O | 10.73361377 | 22.26921399 | 16.81564631 |
| O | 9.09183098  | 23.08098644 | 14.67158167 |

|   |             |             |             |
|---|-------------|-------------|-------------|
| O | 5.09769841  | 7.47409585  | 14.37348579 |
| O | 7.30632257  | 6.12656736  | 14.29711606 |
| O | 6.86210842  | 10.63528716 | 13.92041793 |
| O | 9.30462920  | 9.70269262  | 14.73341301 |
| O | 8.65279913  | 7.60518241  | 16.70734245 |
| O | 10.69575333 | 6.66653062  | 18.22886621 |
| O | 7.14085878  | 4.37873929  | 16.88585594 |
| O | 9.16598026  | 3.64243263  | 18.59109960 |
| O | 9.48074267  | 14.87333847 | 14.14907032 |
| O | 11.43444112 | 12.99224446 | 14.67060873 |
| O | 10.89062989 | 17.90477668 | 15.26593072 |
| O | 13.22222437 | 16.55690673 | 15.92187855 |
| O | 12.30288102 | 14.46659339 | 18.06348994 |
| O | 27.97037929 | 11.43859591 | 16.36907079 |
| O | 10.53006255 | 11.18465585 | 17.34404072 |
| O | 12.91114432 | 10.15830421 | 17.55618069 |
| O | 7.71394541  | 1.55125363  | 14.59083965 |
| O | 9.85807118  | 0.86826411  | 16.29305398 |
| O | 9.62443472  | 4.84940998  | 14.36854577 |
| O | 11.65720057 | 4.03506878  | 16.14363453 |
| O | 4.29116455  | 23.21194198 | 16.80328088 |
| O | 11.70845529 | 2.15710711  | 18.96125735 |
| O | 15.14857766 | 22.06872012 | 17.77988126 |
| O | 13.09347316 | 23.22025095 | 18.96413075 |
| O | 11.63764678 | 8.27679639  | 15.48203672 |
| O | 14.06644858 | 7.14324138  | 15.42098495 |
| O | 13.79515822 | 11.83756449 | 14.95671902 |



|   |             |             |             |
|---|-------------|-------------|-------------|
| O | 2.62164947  | 8.73888160  | 14.82209294 |
| O | 4.73293828  | 5.79731857  | 17.85838619 |
| O | 2.52686099  | 5.18513760  | 16.43087119 |
| O | 2.50048000  | 2.23121860  | 17.85242296 |
| O | 13.35789602 | 5.58842540  | 18.15457526 |
| O | 14.00749466 | 21.25790928 | 14.44038758 |
| O | 15.08224700 | 19.32402023 | 16.00407378 |
| O | 3.44162946  | 20.58347306 | 16.43605341 |
| O | 3.54645641  | 16.42158873 | 18.82009620 |
| O | 5.24401634  | 18.11729057 | 17.61726429 |
| O | 3.14403265  | 14.94438237 | 16.65106869 |
| O | 14.37729532 | 17.55259928 | 18.66447371 |
| O | 1.35770299  | 0.74061233  | 12.44631983 |
| O | 3.02863107  | 0.54650793  | 14.65744478 |
| O | 2.69809819  | 3.77040914  | 13.55927515 |
| O | 4.69618358  | 3.21888458  | 15.25367213 |
| O | 7.27778183  | 0.33626284  | 18.88952966 |
| O | 5.06653610  | 1.01059170  | 17.46524816 |
| O | 8.98726450  | 20.78857315 | 18.50763156 |
| O | 6.88900055  | 22.12812337 | 17.25477276 |
| O | 18.14039735 | 13.93064456 | 15.18413727 |
| O | 15.63424348 | 14.66836909 | 16.00742487 |
| O | 19.91565594 | 16.82338704 | 16.35473039 |
| O | 17.70812938 | 17.96578202 | 15.24410399 |
| O | 21.03423626 | 14.79490930 | 18.43197208 |
| O | 18.66466559 | 14.59848221 | 19.40234060 |
| O | 19.26280531 | 10.15633399 | 17.26690436 |

|   |             |             |             |
|---|-------------|-------------|-------------|
| O | 17.31583112 | 11.85432683 | 17.69193492 |
| O | 20.04759361 | 21.21462190 | 14.81313057 |
| O | 18.57673318 | 19.78203256 | 12.96402750 |
| O | 22.07437025 | 23.83024621 | 14.81838602 |
| O | 21.32435818 | 23.08558628 | 12.36248264 |
| O | 24.05672721 | 19.23694793 | 15.40701391 |
| O | 24.51473348 | 21.60861613 | 16.68392340 |
| O | 22.26849316 | 17.45929917 | 18.28776678 |
| O | 21.81384060 | 19.71318504 | 17.05329647 |
| O | 18.53080707 | 8.67805128  | 14.74730089 |
| O | 20.30518486 | 7.46933009  | 13.11051565 |
| O | 20.57132955 | 12.24024935 | 15.39874035 |
| O | 21.99674986 | 11.38623900 | 13.18251744 |
| O | 22.34439988 | 15.19998605 | 15.71041897 |
| O | 23.82217130 | 14.20523633 | 13.55607164 |
| O | 26.94124512 | 15.34442603 | 15.40772251 |
| O | 14.45212023 | 12.98987420 | 18.14666172 |
| O | 24.17734192 | 11.77799146 | 16.52091904 |
| O | 25.63074511 | 11.51190639 | 18.73835743 |
| O | 20.92551736 | 2.68778045  | 14.21136562 |
| O | 22.64690042 | 0.67293975  | 13.40402757 |
| O | 22.85270828 | 6.65753587  | 13.02428927 |
| O | 24.82375739 | 4.85561468  | 12.59497668 |
| O | 13.22219927 | 0.73742055  | 17.26862263 |
| O | 26.50648457 | 3.03081847  | 15.40705527 |
| O | 27.42491174 | 23.48763420 | 17.19478500 |
| O | 22.50098267 | 1.20198642  | 16.88422294 |

|   |             |             |             |
|---|-------------|-------------|-------------|
| O | 24.38184823 | 9.41376223  | 14.06219973 |
| O | 26.91005488 | 9.48571159  | 13.32895264 |
| O | 26.14977301 | 12.71948807 | 13.03650700 |
| O | 16.08830555 | 10.30567982 | 15.03876509 |
| O | 17.79451363 | 7.00491780  | 17.34279194 |
| O | 15.64109233 | 8.48640416  | 17.62517244 |
| O | 15.44205400 | 4.31192015  | 17.26061901 |
| O | 26.59920665 | 8.27098843  | 16.59223321 |
| O | 28.72456121 | 23.96292303 | 13.71744236 |
| O | 19.24161798 | 19.11988305 | 19.40870693 |
| O | 17.98066060 | 20.65905638 | 17.70199595 |
| O | 16.68381639 | 16.36166745 | 18.30371985 |
| O | 3.40591285  | 19.12406722 | 19.41559974 |
| O | 16.37128160 | 5.65345814  | 14.59341574 |
| O | 18.59406038 | 4.49505724  | 13.78112992 |
| O | 19.79107747 | 1.81145109  | 17.10393313 |
| O | 17.44058479 | 2.56022479  | 16.42972925 |
| O | 21.64946177 | 22.81396363 | 17.48113494 |
| O | 19.37762235 | 24.09338364 | 16.66147905 |
| O | 4.34883036  | 12.31528654 | 11.99185012 |
| H | 1.99567416  | 13.78837386 | 12.89709182 |
| O | 5.98424200  | 15.75156341 | 12.37944494 |
| H | 6.47591905  | 14.85011750 | 12.28892912 |
| O | 6.76573670  | 13.32364340 | 12.44551526 |
| H | 5.79013458  | 13.33024390 | 12.27925000 |
| O | 27.98117998 | 15.41487084 | 12.22040118 |
| H | 28.54586716 | 15.51492229 | 11.44072400 |

|   |             |             |             |
|---|-------------|-------------|-------------|
| O | 6.74722603  | 13.26479836 | 19.76965286 |
| O | 5.53204863  | 8.47637828  | 19.11648221 |
| H | 4.53720772  | 4.64858481  | 22.01265872 |
| O | 5.49680786  | 4.78533567  | 22.07921476 |
| O | 2.33291035  | 7.12644363  | 18.29178032 |
| O | 8.28208356  | 19.78892945 | 13.26618398 |
| H | 7.79178166  | 19.48736439 | 12.47816549 |
| O | 10.73188277 | 21.05484745 | 14.43135403 |
| H | 6.99312970  | 22.43643329 | 10.97869875 |
| O | 7.56674170  | 21.74415108 | 10.52037061 |
| H | 6.96042223  | 21.12678002 | 10.08732105 |
| O | 12.44321949 | 20.18862254 | 17.61472637 |
| H | 12.12105602 | 20.15377263 | 18.57928251 |
| O | 11.58112706 | 20.25762703 | 20.07465976 |
| H | 12.32355795 | 20.19406493 | 20.68870095 |
| O | 9.78837017  | 15.66720555 | 17.54468084 |
| H | 9.68441042  | 16.47094650 | 18.11570656 |
| O | 7.21380153  | 16.22024800 | 18.30122471 |
| H | 8.05179368  | 15.74835387 | 18.08972817 |
| O | 9.49024005  | 13.31566391 | 20.51933169 |
| O | 6.44070748  | 6.86532234  | 11.91865164 |
| H | 5.78125445  | 8.18127728  | 11.42460794 |
| O | 8.84475446  | 10.69512585 | 12.15661312 |
| H | 9.36132327  | 11.50835424 | 11.94718657 |
| O | 10.03188037 | 7.33682093  | 12.30260918 |
| H | 9.81689223  | 8.21349788  | 11.94801207 |
| O | 5.32562983  | 9.08350881  | 11.18383354 |

|   |             |             |             |
|---|-------------|-------------|-------------|
| H | 4.37828796  | 8.92820060  | 11.35979454 |
| O | 9.01351356  | 8.62000248  | 19.04770324 |
| O | 6.59158872  | 4.09963780  | 19.40107625 |
| O | 23.56167188 | 3.16794709  | 20.59588057 |
| O | 5.21948913  | 1.54605234  | 20.07336413 |
| H | 22.98878130 | 2.86612845  | 21.33363961 |
| O | 10.35634637 | 13.11763723 | 12.28944078 |
| H | 9.94256037  | 13.82620853 | 11.76904502 |
| O | 12.06298901 | 16.55366235 | 13.39586600 |
| H | 12.71145110 | 15.79189534 | 13.18385726 |
| O | 13.70854307 | 14.54237246 | 13.04779807 |
| H | 14.62689589 | 14.85893551 | 13.17176382 |
| O | 17.11989000 | 13.05761978 | 11.19025416 |
| H | 17.36078782 | 12.11985724 | 11.11106231 |
| O | 13.41419653 | 14.00039547 | 20.51709607 |
| O | 11.10946661 | 9.83691154  | 19.63665135 |
| H | 9.92386369  | 9.02210351  | 19.35382843 |
| O | 10.45140406 | 9.42921891  | 22.74231917 |
| O | 13.41497949 | 8.35098141  | 20.08102023 |
| H | 12.58448586 | 8.87150096  | 20.15558142 |
| O | 10.19861067 | 0.74435911  | 13.63758583 |
| H | 10.40959015 | 1.62361575  | 13.25885913 |
| O | 7.27192054  | 3.64340826  | 12.15399794 |
| H | 6.54627230  | 4.14488250  | 11.74009504 |
| O | 11.64420714 | 3.29700920  | 13.62899959 |
| H | 12.50526623 | 3.59321551  | 13.12309467 |
| O | 14.42006947 | 1.55540278  | 19.40365495 |

|   |             |             |             |
|---|-------------|-------------|-------------|
| O | 14.76136075 | 21.47208489 | 20.28654049 |
| O | 13.00614600 | 8.07023816  | 13.11000420 |
| H | 12.51010423 | 9.02389798  | 12.96487049 |
| O | 11.90730606 | 10.30588163 | 12.88950540 |
| H | 11.01717629 | 10.10350142 | 12.56005725 |
| O | 2.48775801  | 8.27072594  | 12.29315327 |
| H | 1.86758361  | 8.21953512  | 11.54988830 |
| O | 27.24371646 | 5.93233269  | 14.29210006 |
| H | 26.66654340 | 6.60434828  | 13.88683396 |
| O | 26.82768595 | 3.70412699  | 18.07388222 |
| H | 26.50869997 | 21.24667146 | 23.24288719 |
| O | 16.30910284 | 7.93654241  | 22.15240646 |
| O | 15.65501600 | 19.25474005 | 13.47100074 |
| H | 7.43941707  | 0.56401450  | 12.91529447 |
| O | 10.54704811 | 24.16222981 | 12.14668569 |
| H | 7.21766996  | 0.53400387  | 11.39539748 |
| O | 11.07582037 | 20.92336371 | 11.69953763 |
| H | 11.10834186 | 20.80453871 | 10.73832479 |
| O | 5.55518683  | 17.62933889 | 20.15048156 |
| O | 16.02792579 | 17.02865378 | 20.89263365 |
| H | 15.29434075 | 13.92273277 | 20.75196645 |
| O | 6.99271348  | 23.49059817 | 12.36971234 |
| H | 24.76808286 | 3.24389908  | 12.26374998 |
| O | 4.97851333  | 2.43611433  | 12.75569028 |
| H | 5.90928402  | 2.71369670  | 12.46424135 |
| O | 25.15706301 | 2.34473285  | 12.43310822 |
| H | 23.88506469 | 4.28376537  | 13.91319277 |

|   |             |             |             |
|---|-------------|-------------|-------------|
| O | 6.58226458  | 20.92920774 | 19.56428107 |
| H | 19.95564293 | 15.91451443 | 24.10026134 |
| O | 3.94922683  | 21.05300488 | 22.21928584 |
| H | 4.38436523  | 20.17697704 | 22.30846391 |
| O | 16.52915421 | 15.32737728 | 13.55185578 |
| H | 16.36082079 | 13.01681705 | 11.80689688 |
| O | 19.19573118 | 16.42985385 | 13.71660590 |
| H | 23.90238138 | 16.93164151 | 13.12409369 |
| O | 20.69217989 | 13.27151029 | 20.73026291 |
| H | 24.03533670 | 13.85220944 | 22.74736574 |
| O | 18.43736185 | 10.64026135 | 19.85234742 |
| H | 17.97627944 | 9.73589088  | 19.74527561 |
| O | 20.92959356 | 7.26548404  | 18.81677476 |
| H | 20.65739201 | 7.99719633  | 19.39337087 |
| O | 15.33233721 | 10.63554512 | 20.29099877 |
| H | 14.71541255 | 9.88851901  | 20.43535421 |
| O | 17.45500811 | 8.21315531  | 19.70736274 |
| H | 16.95524055 | 8.10354862  | 20.56542453 |
| O | 21.18102720 | 20.33167863 | 12.51529377 |
| H | 21.31154417 | 21.33258773 | 12.36051745 |
| O | 23.71597380 | 22.27305692 | 13.47372751 |
| H | 29.07236063 | 24.27371030 | 9.76852334  |
| O | 17.78027668 | 2.89155056  | 10.36904530 |
| H | 17.88259648 | 3.34863581  | 9.52665357  |
| O | 26.39335063 | 19.65633437 | 16.59149048 |
| H | 5.44161863  | 10.78231203 | 22.28584520 |
| O | 22.05817030 | 19.78301348 | 19.71275897 |

|   |             |             |             |
|---|-------------|-------------|-------------|
| O | 19.69856876 | 16.88389998 | 21.10883200 |
| H | 20.29002985 | 16.25885481 | 21.57110639 |
| O | 23.46549477 | 14.11996769 | 22.00255467 |
| O | 18.63973792 | 9.42527643  | 12.21532789 |
| H | 18.70437100 | 9.14795693  | 11.28687561 |
| O | 19.42594973 | 12.11697636 | 13.03787195 |
| H | 19.38637723 | 11.27243995 | 12.53980330 |
| O | 22.34893237 | 9.08222397  | 11.17824300 |
| H | 21.94712392 | 9.92898035  | 10.93428037 |
| O | 21.78855360 | 9.27400166  | 15.92828985 |
| H | 22.45068376 | 8.79341775  | 16.50389467 |
| O | 22.12792935 | 6.25549547  | 15.91817727 |
| H | 22.68973795 | 6.55519545  | 15.18144041 |
| O | 19.96468978 | 5.03817401  | 16.44971074 |
| H | 20.76165390 | 5.60973624  | 16.29218682 |
| O | 23.50884634 | 3.83754911  | 14.73484852 |
| H | 24.00393461 | 4.31733362  | 15.49880526 |
| O | 21.95777366 | 4.37346340  | 18.58514345 |
| O | 18.39169428 | 3.62414860  | 18.65879345 |
| H | 22.44730212 | 3.95858713  | 19.32448465 |
| O | 22.38747124 | 16.50167843 | 13.46892868 |
| H | 22.03089043 | 19.36024973 | 11.02615050 |
| O | 24.89275370 | 17.16293389 | 12.96665931 |
| H | 24.88151373 | 18.00288551 | 12.48414397 |
| O | 22.03372442 | 18.51068191 | 10.52832122 |
| H | 22.93760155 | 18.36663181 | 10.21118163 |
| O | 28.26034185 | 18.09702256 | 14.07516852 |



|   |             |             |             |
|---|-------------|-------------|-------------|
| H | 28.19203916 | 18.39047407 | 13.15408763 |
| O | 25.10467162 | 16.41683618 | 16.96787779 |
| O | 23.56926262 | 13.19449386 | 18.73377540 |
| H | 23.27103882 | 9.07949675  | 18.44009466 |
| O | 22.23941690 | 10.43998300 | 19.25987980 |
| H | 21.60947034 | 9.82242796  | 19.65789921 |
| O | 23.67346763 | 8.47992719  | 17.77086524 |
| O | 21.83864864 | 2.36942753  | 11.62401452 |
| H | 21.48025772 | 3.39041698  | 11.49269403 |
| O | 20.90103462 | 4.70268419  | 11.48081734 |
| H | 19.98745399 | 4.45611913  | 11.25265432 |
| O | 23.85224842 | 6.45347705  | 10.59840865 |
| H | 24.36582685 | 7.16184868  | 10.17913534 |
| O | 24.79672625 | 4.63497337  | 16.80563115 |
| H | 26.10232286 | 0.78195888  | 24.52604182 |
| O | 23.78624864 | 0.88587073  | 19.26648247 |
| O | 24.52616369 | 23.35105353 | 19.26471730 |
| O | 4.88332240  | 23.28929388 | 19.78595743 |
| H | 4.03218171  | 23.65665911 | 20.06872176 |
| O | 24.95262173 | 9.82516474  | 11.48047502 |
| H | 24.02622151 | 9.50462819  | 11.22700868 |
| O | 24.42652416 | 13.66667211 | 10.66379803 |
| H | 24.65276519 | 13.41512107 | 9.75949152  |
| O | 14.87046983 | 11.04308734 | 12.66414986 |
| H | 14.58571232 | 10.12043713 | 12.54200399 |
| O | 10.52239495 | 4.91316379  | 10.80637262 |
| H | 10.61580925 | 3.95879820  | 10.67814708 |

|   |             |             |             |
|---|-------------|-------------|-------------|
| O | 14.69733939 | 4.10362287  | 19.92860280 |
| H | 14.50964231 | 3.12961935  | 19.76557391 |
| O | 0.26367189  | 0.33844973  | 25.03732374 |
| O | 26.69026812 | 22.95224723 | 11.18212303 |
| H | 26.49923415 | 22.43285350 | 10.38941019 |
| O | 27.42626034 | 21.33445647 | 14.44453845 |
| H | 27.11786895 | 20.63421385 | 15.04987270 |
| O | 29.43821089 | 23.16044189 | 11.26278548 |
| H | 28.49260920 | 22.83395204 | 11.30668649 |
| O | 25.31052271 | 0.67455925  | 9.26622947  |
| H | 25.91564525 | 1.35968591  | 8.94178828  |
| O | 17.40145117 | 22.48201346 | 15.03420139 |
| H | 16.55767559 | 22.78477014 | 14.66229139 |
| O | 17.55199919 | 20.86158797 | 20.43710990 |
| H | 16.58586919 | 20.95451165 | 20.59170339 |
| O | 26.79086218 | 19.85418800 | 19.62856259 |
| H | 26.09292690 | 19.19075554 | 19.51488481 |
| O | 11.30236651 | 14.20126279 | 24.66174081 |
| O | 16.25893570 | 13.78640905 | 20.65763873 |
| H | 13.15699127 | 13.34675837 | 21.28484446 |
| O | 14.18395747 | 2.42119681  | 15.03371474 |
| H | 14.19485821 | 2.39017040  | 14.06628890 |
| O | 16.77955011 | 1.34602845  | 13.32888010 |
| H | 16.17519705 | 2.09921490  | 13.42914485 |
| O | 16.54184824 | 4.70862048  | 12.00310791 |
| H | 17.05505720 | 4.05369645  | 11.43738659 |
| O | 13.64889790 | 4.51324698  | 12.66612600 |

|   |             |             |             |
|---|-------------|-------------|-------------|
| H | 14.49844186 | 4.32230088  | 12.23115563 |
| O | 19.48608278 | 23.03524309 | 19.03556937 |
| O | 21.37734972 | 21.26655012 | 22.22936803 |
| H | 22.19046364 | 21.36829195 | 21.67003689 |
| O | 16.01363642 | 2.35427646  | 22.22226673 |
| H | 15.19185872 | 2.81106122  | 21.97937063 |
| O | 1.31136610  | 2.70019659  | 20.29266646 |
| H | 0.59862751  | 3.30898532  | 20.66478482 |
| H | 29.01290626 | 19.45834265 | 25.22394580 |
| O | 25.23283611 | 8.55122817  | 21.41543094 |
| H | 26.15891530 | 8.50286883  | 21.76416767 |
| H | 24.64792695 | 8.48177413  | 22.20388546 |
| O | 28.69315628 | 18.58353551 | 25.55067532 |
| H | 2.64035439  | 17.92904732 | 25.01561495 |
| H | 4.05287839  | 24.18217220 | 24.36710464 |
| O | 9.63478869  | 19.51470191 | 21.62673964 |
| H | 10.38558890 | 19.83291434 | 21.00233306 |
| H | 10.12186104 | 19.10618196 | 22.36131946 |
| O | 7.86816238  | 21.20089209 | 22.66321807 |
| H | 8.54936590  | 20.62622782 | 22.18245945 |
| H | 7.60390005  | 20.62417909 | 23.41915677 |
| O | 28.66133357 | 21.66909252 | 18.96625960 |
| H | 27.47755107 | 16.21511933 | 21.07058788 |
| H | 28.76693981 | 22.58310275 | 18.64651131 |
| O | 5.24996868  | 18.57596869 | 22.59889232 |
| H | 5.99408179  | 18.77736008 | 23.21530089 |
| H | 4.69372008  | 17.89818311 | 23.06565090 |

|   |             |             |             |
|---|-------------|-------------|-------------|
| O | 19.49020529 | 11.44760976 | 24.22916526 |
| H | 18.81630548 | 10.80593308 | 23.87204302 |
| H | 20.35411584 | 11.16282165 | 23.87842678 |
| O | 23.61943443 | 12.58353590 | 24.58817097 |
| H | 23.34981389 | 13.34517319 | 25.14936437 |
| H | 24.45657914 | 12.21907135 | 24.95803991 |
| O | 25.93551751 | 4.37915759  | 21.11116680 |
| H | 25.88213889 | 4.75398256  | 22.01691262 |
| H | 25.04680614 | 3.95360564  | 20.94125074 |
| O | 2.61463587  | 12.58869625 | 19.41001507 |
| H | 1.96407280  | 13.28064045 | 19.61516439 |
| H | 5.61652002  | 14.65881405 | 22.96957673 |
| O | 4.95376147  | 14.75032692 | 22.21979652 |
| H | 10.40395274 | 13.28205937 | 23.82777074 |
| H | 4.68486374  | 13.81462438 | 21.98295662 |
| O | 3.26669928  | 0.73610948  | 21.70533415 |
| H | 2.49486936  | 1.18605924  | 21.31440672 |
| H | 3.49211445  | 1.26196798  | 22.52241930 |
| O | 14.35946494 | 17.21827115 | 24.44986629 |
| H | 13.54820143 | 17.59782190 | 24.02472159 |
| H | 14.07566059 | 16.34444722 | 24.82854990 |
| O | 8.71493627  | 4.10528618  | 22.43140195 |
| H | 9.38250372  | 4.48962764  | 21.82631930 |
| H | 23.63529125 | 2.35583405  | 20.02117122 |
| O | 2.57634197  | 9.49060221  | 25.55028956 |
| H | 3.51039188  | 9.17450402  | 25.47480910 |
| H | 2.48905334  | 10.12914017 | 24.80962316 |

|   |             |             |             |
|---|-------------|-------------|-------------|
| O | 9.19738498  | 3.23482752  | 25.55387235 |
| H | 10.04023956 | 3.38256095  | 26.02055576 |
| H | 8.88771732  | 4.15337828  | 25.32044455 |
| O | 8.07798229  | 10.43523995 | 20.95348752 |
| H | 7.48804919  | 10.74065078 | 20.21805862 |
| H | 8.28638310  | 9.52039803  | 20.65307035 |
| O | 9.98215897  | 18.09917989 | 18.49407589 |
| H | 18.47903934 | 15.94488665 | 24.59889630 |
| H | 10.16851118 | 18.54016874 | 19.34380077 |
| O | 15.85504298 | 2.22554932  | 24.74886433 |
| H | 15.91995792 | 2.26920678  | 23.68582879 |
| H | 16.72981736 | 2.54922018  | 25.04381788 |
| O | 1.35477841  | 8.61576443  | 22.29322653 |
| H | 1.68794466  | 9.52310615  | 22.54958408 |
| H | 27.81152956 | 8.13345190  | 23.14861033 |
| O | 8.87663621  | 1.42523323  | 21.25112943 |
| H | 8.53796133  | 0.50993369  | 21.29813536 |
| H | 4.48035160  | 1.20951295  | 20.64899966 |
| O | 11.27177247 | 4.97340930  | 21.10569577 |
| H | 11.65792210 | 4.31064068  | 21.70552373 |
| H | 11.37498111 | 5.87344381  | 21.61406855 |
| O | 14.57987558 | 5.37513996  | 22.28860816 |
| H | 15.56247162 | 5.28398776  | 22.37133703 |
| H | 14.41996622 | 4.89036621  | 21.42553633 |
| O | 9.77802459  | 12.65870116 | 23.26050986 |
| H | 10.31592133 | 9.48994090  | 23.71070434 |
| H | 9.50838488  | 13.19591249 | 22.48192726 |

|   |             |             |             |
|---|-------------|-------------|-------------|
| O | 12.41011495 | 16.49283277 | 20.66538362 |
| H | 12.73019015 | 15.55111841 | 20.74871351 |
| H | 8.54905995  | 13.05216954 | 20.37073907 |
| O | 19.32999439 | 16.41944983 | 24.66861226 |
| H | 5.41993349  | 18.08406465 | 21.02928085 |
| H | 13.21381449 | 17.00506085 | 20.86160150 |
| O | 10.97694352 | 22.94290497 | 21.63716894 |
| H | 11.66911680 | 22.35605958 | 22.00171875 |
| H | 10.38160560 | 23.14503359 | 22.40596533 |
| O | 6.78597372  | 1.67450581  | 23.48462545 |
| H | 6.54450136  | 0.68515539  | 23.58544715 |
| H | 6.04224735  | 2.10934249  | 23.94786476 |
| O | 18.52655290 | 3.48981320  | 24.81919550 |
| H | 19.00204906 | 2.72258008  | 24.40875591 |
| H | 19.06993104 | 3.77369445  | 25.56833062 |
| O | 13.75937167 | 9.89588503  | 23.11384825 |
| H | 16.77324425 | 10.11686274 | 24.00982057 |
| H | 16.81961966 | 7.18035186  | 22.48786472 |
| O | 11.62842001 | 7.12634479  | 22.52185712 |
| H | 10.87914786 | 8.50017281  | 22.58262885 |
| H | 11.32616541 | 6.82752860  | 23.39751948 |
| O | 22.71680779 | 5.12081017  | 23.10613122 |
| H | 22.01586930 | 5.71903137  | 23.44273337 |
| H | 22.82294850 | 5.46792799  | 22.18136338 |
| O | 25.14899862 | 22.54729275 | 22.82192586 |
| H | 24.60133754 | 23.22307936 | 23.25464872 |
| H | 24.55187973 | 22.09674511 | 22.16123757 |

|   |             |             |             |
|---|-------------|-------------|-------------|
| O | 15.30206319 | 12.71670313 | 23.40211520 |
| H | 14.35456957 | 12.57648909 | 22.99297531 |
| H | 15.31823637 | 12.14437704 | 24.18840771 |
| O | 16.69315153 | 15.40450515 | 23.63710610 |
| H | 16.30288887 | 14.50463944 | 23.66324781 |
| H | 15.93258772 | 16.01034027 | 23.75323836 |
| O | 10.12526020 | 0.07008510  | 24.37479782 |
| H | 14.12140759 | 21.43601112 | 21.03350152 |
| H | 11.02099180 | -0.11788987 | 24.69623603 |
| O | 20.82222838 | 23.90128233 | 22.30462831 |
| H | 21.03367392 | 22.93360346 | 22.17325843 |
| H | 20.33749353 | 23.87704301 | 23.19135353 |
| O | 24.94086153 | 1.81716641  | 23.33545311 |
| H | 23.95235274 | 1.87568010  | 23.31943912 |
| H | 25.22668434 | 2.73498527  | 23.47763633 |
| O | 17.37921065 | 9.96973978  | 23.25985856 |
| H | 14.22170104 | 10.03598967 | 23.96126455 |
| H | 16.73544956 | 8.78329547  | 22.61424935 |
| O | 25.68813532 | 15.41165488 | 24.44631869 |
| H | 19.53703112 | 13.26119811 | 21.74804244 |
| H | 24.77718412 | 15.29644491 | 24.82235217 |
| O | 18.70812496 | 13.32233145 | 22.37077121 |
| H | 19.01281552 | 12.84646945 | 23.18773410 |
| H | 25.99361147 | 14.54389700 | 24.13103738 |
| O | 27.37194198 | 22.61544348 | 21.25243643 |
| H | 26.65401525 | 22.91164334 | 21.85462835 |
| H | 28.00081300 | 23.35058719 | 21.14515407 |

|   |             |             |             |
|---|-------------|-------------|-------------|
| O | 7.29563740  | 23.49095545 | 25.56290502 |
| H | 8.19306145  | 23.50455362 | 25.05467858 |
| H | 7.20922746  | 24.35321008 | 26.00119925 |
| O | 20.38325159 | 9.22236995  | 21.40943929 |
| H | 20.82018251 | 9.95475239  | 21.88344138 |
| H | 19.63512148 | 9.66698343  | 20.94793528 |
| O | 19.69322406 | 5.11819896  | 21.41419589 |
| H | 20.03111151 | 5.77178691  | 22.06299455 |
| H | 18.78068363 | 4.88568909  | 21.75136486 |
| O | 9.18808877  | 18.29977544 | 25.77241331 |
| H | 9.52986509  | 17.59496012 | 25.17099653 |
| H | 9.97347259  | 18.83821533 | 26.00533563 |
| O | 15.39399606 | 10.03175192 | 25.55512076 |
| H | 15.00452107 | 10.68932501 | 26.16721703 |
| H | 14.92865238 | 9.18095753  | 25.69421951 |
| O | 1.49363608  | 4.64497259  | 24.81844691 |
| H | 0.52717230  | 4.56910148  | 24.70865032 |
| H | 1.83297743  | 4.65632582  | 23.88686082 |
| O | 2.33889983  | 2.08679291  | 25.92585715 |
| H | 2.00621914  | 3.00336388  | 25.81766983 |
| H | 1.55822038  | 1.51800331  | 25.71548355 |
| O | 23.75112786 | 21.40592719 | 20.81152997 |
| H | 23.91802556 | 22.20373174 | 20.19065673 |
| H | 23.16590120 | 20.74539036 | 20.28750514 |
| O | 22.17654273 | 11.03047360 | 22.89584072 |
| H | 22.59607249 | 11.63706702 | 23.57190331 |
| H | 22.62936793 | 10.16682396 | 23.08912714 |



|   |             |             |             |
|---|-------------|-------------|-------------|
| O | 22.21750846 | 18.16876769 | 22.82084552 |
| H | 22.08821297 | 18.54172334 | 23.74972440 |
| H | 23.12468480 | 18.41114717 | 22.50249497 |
| O | 27.16844153 | 20.52677830 | 23.18614444 |
| H | 26.74282571 | 19.76378432 | 23.61472308 |
| H | 24.65491769 | 0.75796843  | 19.72377939 |
| O | 13.77035014 | 14.54153307 | 25.18543778 |
| H | 14.22380870 | 14.13514280 | 24.42356578 |
| H | 12.72987340 | 14.41248109 | 24.95413031 |
| O | 18.44214165 | 7.87365748  | 24.66279341 |
| H | 18.49232031 | 8.18283895  | 25.57964568 |
| H | 18.11687816 | 8.67847903  | 24.14828020 |
| O | 11.56064547 | 22.34530524 | 24.88888238 |
| H | 11.90335226 | 21.88201088 | 24.10065077 |
| H | 12.69289450 | 23.58103283 | 24.71951942 |
| O | 25.01604494 | 11.43518387 | 21.26981432 |
| H | 25.12187019 | 10.46291692 | 21.38056121 |
| H | 25.38147577 | 11.55568691 | 19.71199622 |
| O | 13.08305145 | 21.06654024 | 22.59459948 |
| H | 11.00577353 | 13.89510701 | 25.53566989 |
| H | 13.92445003 | 21.20220704 | 23.11282103 |
| O | 27.02349370 | 15.41180529 | 20.73353479 |
| H | 12.78451289 | 20.14805294 | 22.79409563 |
| H | 25.42547051 | 15.81406533 | 20.48033304 |
| O | 6.15759541  | 10.36580918 | 22.81488316 |
| H | 6.92912155  | 10.37312895 | 22.16606098 |
| H | 24.82267322 | 24.10094668 | 19.80325593 |

|   |             |             |             |
|---|-------------|-------------|-------------|
| O | 8.50685687  | 15.41697397 | 21.64246394 |
| H | 9.02288771  | 14.61061993 | 21.20383414 |
| H | 8.19417621  | 15.12228188 | 22.52514975 |
| O | 9.41185830  | 23.35920478 | 23.99231756 |
| H | 8.89651597  | 22.67984438 | 23.51039535 |
| H | 10.62000781 | 22.73676138 | 24.57458697 |
| O | 23.32015181 | 8.55550458  | 23.48455114 |
| H | 23.87621989 | 8.62559519  | 24.32120225 |
| H | 22.54216850 | 7.99391664  | 23.66812916 |
| O | 3.74027153  | 16.68669409 | 23.85227189 |
| H | 4.42378099  | 16.64970109 | 24.58668660 |
| H | 3.91899757  | 15.87916021 | 23.30952824 |
| O | 27.49752693 | 15.61263529 | 18.07681675 |
| H | 27.24320153 | 15.42940327 | 19.76115436 |
| H | 2.10502401  | 11.72551904 | 19.46069909 |
| O | 14.38546844 | 12.45515553 | 26.81545767 |
| H | 14.18125032 | 13.28474344 | 26.27635439 |
| H | 14.86927507 | 12.77399645 | 27.59255970 |
| O | 11.51140184 | 11.90694347 | 26.96623216 |
| H | 12.48309859 | 12.03163251 | 27.02619067 |
| H | 11.20064360 | 11.93102130 | 27.88373335 |
| O | 2.26662956  | 11.09237030 | 23.04039639 |
| H | 3.04036799  | 11.43474371 | 22.56441905 |
| H | 28.03172691 | 11.75074924 | 22.86113631 |
| O | 7.52890626  | 10.15062045 | 26.44939070 |
| H | 7.42297252  | 10.95815214 | 25.89936436 |
| H | 6.81445672  | 9.55214185  | 26.15078877 |

|   |             |             |             |
|---|-------------|-------------|-------------|
| O | 13.35442103 | 0.66405564  | 24.06885784 |
| H | 16.98708111 | 24.42030039 | 23.33861365 |
| H | 14.08055419 | 0.98793181  | 24.63152572 |
| O | 13.19359394 | 6.18772055  | 9.48735612  |
| H | 14.00123044 | 5.64746711  | 9.49442446  |
| H | 12.50174431 | 5.61026213  | 9.11333212  |
| O | 27.82584564 | 10.29116217 | 19.33761188 |
| H | 27.64022602 | 9.76237866  | 20.12866913 |
| H | 26.95940994 | 10.71800899 | 19.03920465 |
| O | 26.72090965 | 12.58585272 | 22.74051961 |
| H | 26.95642948 | 13.43271120 | 22.32852003 |
| H | 25.74517541 | 11.92196934 | 21.88553592 |
| O | 8.47794192  | 5.65841775  | 24.38587477 |
| H | 8.56189272  | 5.06957819  | 23.51267801 |
| H | 7.50910962  | 5.79411025  | 24.52672357 |
| O | 3.38425060  | 21.19050960 | 24.73328559 |
| H | 30.06579995 | 21.14416094 | 23.68120694 |
| H | 29.31401808 | 21.92586212 | 24.89029543 |
| O | 15.48357035 | 21.25371263 | 23.78197103 |
| H | 16.09323868 | 21.99715222 | 23.64475614 |
| H | 15.88775868 | 20.46940455 | 23.32582371 |
| O | 7.03724034  | 7.53575149  | 21.99132292 |
| H | 6.74817736  | 8.37425365  | 22.38988037 |
| H | 7.63490364  | 7.11481429  | 22.63378461 |
| O | 22.58093393 | 21.46434630 | 24.51789785 |
| H | 23.52126406 | 21.30800759 | 24.34430993 |
| H | 21.80370952 | 21.32720262 | 23.17832297 |

|   |             |             |             |
|---|-------------|-------------|-------------|
| O | 28.23216627 | 17.83810550 | 21.85783226 |
| H | 27.62223226 | 17.80045993 | 22.64499348 |
| H | 29.06006722 | 17.46009175 | 22.20048495 |
| O | 24.44385583 | 16.01483052 | 20.36916604 |
| H | 24.37188920 | 16.95962754 | 20.61935739 |
| H | 23.91801325 | 14.85200343 | 21.49757770 |
| O | 25.97199768 | 0.74094865  | 20.89845257 |
| H | 26.66567142 | 1.35541285  | 20.55307021 |
| H | 25.64969890 | 1.16963196  | 21.72794843 |
| O | 14.61788030 | 4.71317686  | 25.03553220 |
| H | 14.43686274 | 4.79939123  | 24.07059457 |
| H | 15.06961839 | 3.83351106  | 25.09531567 |
| O | 25.05448252 | 8.88655965  | 25.48137089 |
| H | 25.83877678 | 8.29786600  | 25.42568636 |
| H | 25.42682788 | 9.78567456  | 25.32664184 |
| O | 11.67384553 | 19.84283000 | 25.93646768 |
| H | 11.55905518 | 20.81155345 | 25.74554112 |
| H | 12.59605529 | 19.74985063 | 26.27508147 |
| O | 17.27418421 | 4.64455461  | 22.51922686 |
| H | 16.88372040 | 3.72071864  | 22.29265868 |
| H | 17.59930877 | 4.51987927  | 23.43462217 |
| O | 13.96933415 | 7.53159447  | 24.96572690 |
| H | 13.01147118 | 7.44461359  | 25.12958990 |
| H | 14.34186743 | 6.66316503  | 25.22904910 |
| O | 5.26125277  | 8.61833870  | 25.03776337 |
| H | 5.37570867  | 7.66754866  | 24.77746332 |
| H | 5.50270284  | 9.13073593  | 24.23989434 |

|   |             |             |             |
|---|-------------|-------------|-------------|
| O | 12.84092406 | 12.37555358 | 22.44488868 |
| H | 12.38444076 | 12.85093687 | 23.16499063 |
| H | 13.37630487 | 10.78211037 | 22.85654461 |
| O | 22.27593921 | 23.62848082 | 25.70582454 |
| H | 22.45274857 | 22.66679514 | 25.25558999 |
| H | 22.58288608 | 23.57903172 | 26.62218682 |
| O | 16.25243546 | 18.77753213 | 22.81693984 |
| H | 16.15444549 | 18.19152457 | 21.97388020 |
| H | 15.73067145 | 18.27876047 | 23.47640177 |
| O | 17.53463476 | 23.42969413 | 21.63750130 |
| H | 17.79904673 | 22.51595680 | 21.38632421 |
| H | 16.79069668 | 23.61304856 | 21.00641939 |
| O | 23.07930808 | 15.14177691 | 25.33687825 |
| H | 22.63832232 | 15.72883184 | 26.01327946 |
| H | 22.48844170 | 15.25267540 | 24.55564877 |
| O | 22.97420300 | 6.53519809  | 20.66137017 |
| H | 23.60266215 | 7.27021176  | 20.79603451 |
| H | 22.17578884 | 6.93503316  | 20.22613784 |
| O | 22.20971066 | 2.35463018  | 22.96667693 |
| H | 22.11752196 | 3.31753215  | 23.15061676 |
| H | 21.34068067 | 1.93335340  | 23.16446743 |
| O | 5.69470639  | 20.92905748 | 26.37165226 |
| H | 4.85661854  | 21.13349960 | 25.89074108 |
| H | 6.19530547  | 21.76734291 | 26.41584993 |
| O | 4.63735918  | 12.25462818 | 21.25520550 |
| H | 5.45606183  | 12.46437651 | 20.70454461 |
| H | 3.90674502  | 12.31171032 | 20.58365284 |

|   |             |             |             |
|---|-------------|-------------|-------------|
| O | 11.93192744 | 4.36898515  | 25.77712899 |
| H | 11.55329104 | 5.28306125  | 25.76392465 |
| H | 12.90884408 | 4.48951267  | 25.73101673 |
| O | 18.99562510 | 7.06781096  | 10.22060749 |
| H | 18.40566396 | 6.84486315  | 10.99013875 |
| H | 18.53600319 | 6.73484531  | 9.43639681  |
| O | 10.28344756 | 16.49248165 | 23.85476540 |
| H | 9.85285683  | 16.28383310 | 23.00288686 |
| H | 10.67076187 | 15.60395607 | 24.20401093 |
| O | 24.63662575 | 18.64102911 | 21.63585685 |
| H | 25.37184571 | 18.56687856 | 22.27012903 |
| H | 24.71787937 | 19.52691758 | 21.22522138 |
| O | 21.43372870 | 15.55817044 | 23.05076018 |
| H | 21.86949885 | 16.43793572 | 22.91680603 |
| H | 21.97820313 | 14.90448752 | 22.54666676 |
| O | 25.38446267 | 5.24944051  | 23.84554497 |
| H | 25.66408456 | 6.16521887  | 24.01942133 |
| H | 24.39814577 | 5.29109142  | 23.74113855 |
| O | 2.52948565  | 4.65434171  | 22.22288031 |
| H | 2.68786568  | 5.49208538  | 21.69543821 |
| H | 2.27387218  | 3.99841495  | 21.54716929 |
| O | 19.63960842 | 23.75554919 | 24.73785472 |
| H | 16.22136582 | 0.47547719  | 24.88858035 |
| H | 20.45404674 | 23.63056061 | 25.27828956 |
| O | 10.09985866 | 9.49704270  | 25.70306249 |
| H | 9.16246772  | 9.67107343  | 25.99521725 |
| H | 10.62546699 | 10.22483076 | 26.09119231 |

|   |             |             |             |
|---|-------------|-------------|-------------|
| O | 6.87959725  | 14.74998554 | 24.01463983 |
| H | 6.68660876  | 15.29378456 | 24.80326977 |
| H | 7.04479462  | 13.80567724 | 24.33078826 |
| O | 25.62366417 | 6.45394726  | 19.03517650 |
| H | 25.87670773 | 5.87601435  | 19.78629844 |
| H | 25.75611717 | 7.37611202  | 19.31621100 |
| O | 3.26113962  | 6.93234246  | 20.81723098 |
| H | 2.83935470  | 7.08229777  | 19.89485393 |
| H | 2.89008923  | 7.65997507  | 21.35777583 |
| O | 12.03425229 | 18.56993724 | 23.55537972 |
| H | 11.84280946 | 19.00359326 | 24.43440129 |
| H | 11.44908761 | 17.75971217 | 23.54010199 |
| O | 19.69783557 | 1.14575923  | 23.70780884 |
| H | 19.58154536 | 0.55960388  | 24.51130628 |
| H | 19.07217398 | 0.74826370  | 23.05601852 |
| O | 3.99625841  | 2.35267085  | 23.78370469 |
| H | 3.82195531  | 3.24952036  | 23.44491104 |
| H | 3.38840226  | 2.23336679  | 24.56993340 |
| O | 5.45946660  | 23.08257295 | 23.71580750 |
| H | 4.93819573  | 22.35513697 | 24.10899432 |
| H | 6.17271677  | 23.29522668 | 24.39888999 |
| O | 14.49534517 | 19.45329630 | 26.29976379 |
| H | 14.56026944 | 18.62567354 | 25.77546677 |
| H | 14.93883779 | 20.12537970 | 25.75358972 |
| O | 7.03852001  | 19.31434451 | 24.60243382 |
| H | 6.59116161  | 19.88895317 | 25.28170058 |
| H | 7.90460486  | 19.00599046 | 25.02653055 |

|   |             |             |             |
|---|-------------|-------------|-------------|
| O | 27.45647721 | 7.47434791  | 24.88704493 |
| H | 1.55449163  | 8.16808507  | 25.23464789 |
| H | 1.31120149  | 6.59776507  | 25.07614735 |
| O | 4.33144216  | 18.37135039 | 27.63108628 |
| H | 4.77504030  | 19.23815063 | 27.58893647 |
| H | 3.48031410  | 18.50613580 | 27.16706855 |
| O | 5.68574624  | 16.89100363 | 25.70327935 |
| H | 5.26592486  | 17.27095786 | 26.52070259 |
| H | 6.22931983  | 17.63650509 | 25.36765423 |
| O | 11.79888082 | 2.89457235  | 23.40881347 |
| H | 12.44162702 | 2.16090924  | 23.56771112 |
| H | 11.86963645 | 3.48404782  | 24.20882870 |
| O | 21.54970156 | 19.24062250 | 25.18839035 |
| H | 21.99600194 | 20.17132299 | 25.04737088 |
| H | 20.59893792 | 19.41108311 | 25.06619736 |
| O | 18.94240651 | 18.97248526 | 23.47814152 |
| H | 19.06880555 | 18.07992694 | 23.88933010 |
| H | 17.97213056 | 18.97529540 | 23.26273041 |
| O | 7.42807367  | 12.23740250 | 24.51829101 |
| H | 6.90972673  | 11.64691376 | 23.91499633 |
| H | 8.34092614  | 12.27823775 | 24.10922878 |
| O | 20.69100069 | 7.13972161  | 23.26147330 |
| H | 20.56539325 | 7.82185654  | 22.55322551 |
| H | 19.94211834 | 7.34951214  | 23.88835046 |
| O | 5.71159883  | 5.91781693  | 24.36454178 |
| H | 5.60314884  | 5.45571769  | 23.39917726 |
| H | 5.28908141  | 5.31304507  | 24.99224637 |



|   |             |             |             |
|---|-------------|-------------|-------------|
| O | 21.52383100 | 16.83245958 | 26.74815368 |
| H | 20.65645257 | 16.58119394 | 26.37736574 |
| H | 21.66190857 | 17.73520244 | 26.38298136 |
| O | 26.46768492 | 17.89367088 | 23.93595825 |
| H | 26.13338494 | 16.95960061 | 24.09761045 |
| H | 27.08164733 | 18.07523467 | 24.68942925 |
| O | 10.70266307 | 6.79914232  | 25.40852710 |
| H | 10.52990818 | 7.72996254  | 25.68696079 |
| H | 9.83076083  | 6.47535001  | 25.04704976 |
| O | 18.67652584 | 16.41712674 | 11.19060992 |
| H | 18.15921962 | 20.53100538 | 12.51041189 |
| H | 18.45744578 | 16.31260537 | 10.25247121 |
| O | 26.13438446 | 11.51230789 | 25.04283255 |
| H | 26.80361283 | 11.70402347 | 25.71684118 |
| H | 26.42631692 | 12.00649176 | 24.20026618 |
| C | 13.84926411 | 14.82937295 | 10.80454511 |
| O | 13.04967585 | 13.99350835 | 10.50826925 |
| O | 14.66316511 | 15.68569888 | 10.73759538 |

## **2-P**

|    |             |             |             |
|----|-------------|-------------|-------------|
| Si | 3.54178817  | 12.17735981 | 13.35662620 |
| Si | 6.07398444  | 16.28813882 | 13.90761980 |
| Si | 6.62824402  | 12.59221847 | 18.27408352 |
| Si | 5.46275944  | 9.65533632  | 18.04709331 |
| Si | 7.28675883  | 19.03711747 | 14.57888159 |
| Si | 10.43206527 | 22.42685221 | 15.26283882 |
| Si | 5.98260056  | 6.50278184  | 13.41710599 |
| Si | 8.47927531  | 10.76422606 | 13.83083313 |

|    |             |             |             |
|----|-------------|-------------|-------------|
| Si | 9.20000422  | 7.20495955  | 18.17029764 |
| Si | 7.81500339  | 4.48425476  | 18.38054472 |
| Si | 10.05433717 | 13.46215678 | 13.95072012 |
| Si | 12.35031010 | 17.37231098 | 14.81222792 |
| Si | 13.12282583 | 13.40832449 | 19.00694604 |
| Si | 11.67514368 | 10.75156894 | 18.41734169 |
| Si | 9.04351774  | 0.72122412  | 14.91809586 |
| Si | 11.14437562 | 4.52548421  | 14.69797241 |
| Si | 12.93505346 | 1.14882741  | 18.84924392 |
| Si | 14.61293608 | 22.74329547 | 19.16982467 |
| Si | 12.70893569 | 7.45343237  | 14.63763177 |
| Si | 1.97877143  | 9.37481918  | 13.49970755 |
| Si | 3.10646925  | 5.80281015  | 17.83936038 |
| Si | 1.73493438  | 3.29793262  | 18.76242298 |
| Si | 14.48750284 | 19.67274846 | 14.50374889 |
| Si | 4.35402967  | 17.91035621 | 18.95130899 |
| Si | 2.45805329  | 16.11002445 | 17.53022567 |
| Si | 5.79799940  | 24.12257642 | 13.23010672 |
| Si | 4.31164712  | 3.64331811  | 13.69616540 |
| Si | 5.69313264  | 0.46004436  | 18.85647772 |
| Si | 7.66708968  | 21.71585235 | 18.61144997 |
| Si | 16.59878889 | 14.21728883 | 14.84250509 |
| Si | 19.18388750 | 17.36057343 | 15.02778560 |
| Si | 20.08873185 | 13.80613135 | 19.33866469 |
| Si | 18.69372257 | 11.25154938 | 18.29450135 |
| Si | 20.04229704 | 20.07463824 | 13.71027518 |
| Si | 22.61937297 | 23.43148701 | 13.32351071 |

|    |             |             |             |
|----|-------------|-------------|-------------|
| Si | 24.80533800 | 19.98292704 | 16.66465265 |
| Si | 22.61362173 | 19.04632739 | 18.35545709 |
| Si | 18.82862393 | 8.10450507  | 13.27310230 |
| Si | 20.94751360 | 12.38713596 | 13.82525839 |
| Si | 22.55271705 | 14.96114827 | 14.09937553 |
| Si | 26.28344124 | 15.32174746 | 16.89563827 |
| Si | 24.73950255 | 12.57445031 | 17.79785486 |
| Si | 21.39464102 | 1.65189090  | 13.06426627 |
| Si | 24.24887425 | 6.31055133  | 12.27895020 |
| Si | 25.76674973 | 3.34181564  | 16.84398730 |
| Si | 23.86937460 | 0.76623496  | 17.59130463 |
| Si | 25.41014922 | 9.04961639  | 12.89469253 |
| Si | 15.21444565 | 11.41317430 | 14.31357190 |
| Si | 16.65758319 | 7.50852204  | 18.41321602 |
| Si | 14.81344833 | 5.07181181  | 18.56980212 |
| Si | 29.96893469 | 23.74050655 | 12.73806688 |
| Si | 17.82959997 | 19.84278873 | 19.11433211 |
| Si | 15.88480311 | 17.30723189 | 19.32123018 |
| Si | 17.32901382 | 5.38237412  | 13.30369921 |
| Si | 18.39416128 | 2.30719937  | 17.76044598 |
| Si | 20.40754139 | 23.77143544 | 17.89455152 |
| Ca | 6.61606760  | 12.99268761 | 14.89961786 |
| Ca | 4.87195789  | 9.71353528  | 15.02043476 |
| Ca | 3.30034292  | 12.44829196 | 16.90837907 |
| Ca | 5.38022799  | 15.64452679 | 16.87104185 |
| Ca | 10.25521715 | 19.77897896 | 16.80986258 |
| Ca | 8.90736129  | 16.42175400 | 15.48155282 |

|    |             |             |             |
|----|-------------|-------------|-------------|
| Ca | 7.45911270  | 18.63410952 | 18.41852294 |
| Ca | 10.76640339 | 22.30247823 | 19.24909028 |
| Ca | 9.51624440  | 7.39337191  | 14.66668818 |
| Ca | 7.59307186  | 3.88993022  | 14.71719562 |
| Ca | 6.42880609  | 6.86127425  | 16.52908772 |
| Ca | 8.44075685  | 10.08159106 | 17.10057215 |
| Ca | 13.33248977 | 13.95001955 | 15.99296462 |
| Ca | 11.65442106 | 10.60550342 | 15.36092087 |
| Ca | 9.96799646  | 13.44918895 | 18.14923667 |
| Ca | 12.07633633 | 16.75232950 | 18.20589615 |
| Ca | 11.95687643 | 1.82464585  | 15.74599024 |
| Ca | 13.12090231 | 22.30522511 | 16.60182477 |
| Ca | 9.38856742  | 1.39038751  | 18.90821245 |
| Ca | 11.34136034 | 4.52385776  | 18.65400486 |
| Ca | 2.93822791  | 6.43011074  | 14.36964848 |
| Ca | 2.27867962  | 2.72404415  | 15.60663970 |
| Ca | 12.83677353 | 7.75863040  | 17.90084631 |
| Ca | 1.90832657  | 9.34207208  | 17.09448263 |
| Ca | 3.81376900  | 18.77724218 | 15.25329487 |
| Ca | 26.81518756 | 12.74663400 | 15.06172404 |
| Ca | 14.53215544 | 19.77642672 | 18.19250567 |
| Ca | 4.42187737  | 21.34241114 | 18.38216551 |
| Ca | 5.32149762  | 0.96067734  | 15.13729389 |
| Ca | 5.52218175  | 21.88683112 | 15.48830707 |
| Ca | 5.86091080  | 24.19964293 | 17.86273713 |
| Ca | 5.06987059  | 3.47308535  | 17.73031072 |
| Ca | 20.21400199 | 14.42715759 | 16.21018232 |

|    |             |             |             |
|----|-------------|-------------|-------------|
| Ca | 18.25210668 | 11.19822201 | 15.34735931 |
| Ca | 16.58120904 | 14.00609375 | 18.33264020 |
| Ca | 19.81321299 | 16.82629426 | 18.72878313 |
| Ca | 22.49295858 | 21.36162914 | 15.53089205 |
| Ca | 22.28524489 | 17.63338316 | 15.74679553 |
| Ca | 20.46141782 | 20.94696676 | 18.39541235 |
| Ca | 23.80306235 | 23.90663541 | 17.16542588 |
| Ca | 22.16822117 | 9.06801776  | 13.65799432 |
| Ca | 20.87580286 | 5.17274645  | 13.86593103 |
| Ca | 19.93418255 | 8.05231802  | 16.71173275 |
| Ca | 21.87074496 | 11.25176486 | 17.11130685 |
| Ca | 26.19258880 | 17.74878074 | 15.19097365 |
| Ca | 24.20067979 | 12.11742567 | 12.40508756 |
| Ca | 23.29245548 | 15.40987589 | 18.11473013 |
| Ca | 28.32750037 | 19.51112071 | 17.73381219 |
| Ca | 24.54882731 | 1.60220933  | 14.54839766 |
| Ca | 25.97523265 | 22.52083811 | 13.35853259 |
| Ca | 21.57927724 | 3.22607992  | 16.61204713 |
| Ca | 26.85855716 | 6.23799997  | 16.74932594 |
| Ca | 16.20992044 | 8.01484657  | 15.42123325 |
| Ca | 14.24840336 | 4.84538310  | 15.20265083 |
| Ca | 25.04995431 | 9.62746101  | 16.30742905 |
| Ca | 15.14606934 | 10.70813778 | 18.02747123 |
| Ca | 17.25269429 | 20.17429315 | 15.46503722 |
| Ca | 15.59408582 | 16.94901726 | 16.35598577 |
| Ca | 28.96619743 | 22.52791117 | 15.75766152 |
| Ca | 17.43689160 | 22.90543784 | 17.47673530 |

|    |             |             |             |
|----|-------------|-------------|-------------|
| Ca | 18.73025797 | 2.09335583  | 14.67890759 |
| Ca | 19.63673165 | 23.50204122 | 14.49895553 |
| Ca | 15.29223959 | 2.01980246  | 17.01000884 |
| Ca | 17.62623773 | 4.88797890  | 16.48079060 |
| Ca | 10.69405364 | 19.15265796 | 13.26980489 |
| Ca | 5.73487980  | 6.49705674  | 20.12835442 |
| Ca | 6.27063110  | 11.20164752 | 11.70145085 |
| Ca | 6.48620820  | 15.39438362 | 20.34108688 |
| Ca | 12.72598770 | 12.44084397 | 12.67485108 |
| Ca | 6.90616800  | 3.02838294  | 21.34236565 |
| Ca | 8.55637237  | 5.58405891  | 11.89516506 |
| Ca | 10.74240441 | 11.32633602 | 21.39214341 |
| Ca | 26.88996464 | 3.95821724  | 13.21976706 |
| Ca | 9.45141695  | 2.13082285  | 23.34735188 |
| Ca | 12.61023294 | 22.11473730 | 12.99109360 |
| Ca | 13.80474301 | 7.69309051  | 22.15106722 |
| Ca | 8.86058159  | 22.23860607 | 12.58406028 |
| Ca | 17.69880703 | 15.44183640 | 21.35520623 |
| Ca | 2.46612022  | 15.82027376 | 14.31517093 |
| Ca | 5.99725617  | 22.25479781 | 21.46760323 |
| Ca | 20.71346115 | 17.10941891 | 12.15193632 |
| Ca | 16.79853211 | 11.68087775 | 21.55268948 |
| Ca | 18.58687733 | 14.41419682 | 12.74063604 |
| Ca | 20.41278050 | 19.06753626 | 21.45235795 |
| Ca | 25.78149756 | 14.68140293 | 12.22531304 |
| Ca | 19.87837128 | 5.22019187  | 19.05479845 |
| Ca | 21.47107193 | 6.97610161  | 11.09511420 |

|    |             |             |             |
|----|-------------|-------------|-------------|
| Ca | 22.72569928 | 12.17221889 | 20.65678317 |
| Ca | 12.12672056 | 6.15825755  | 11.82506450 |
| Ca | 26.27070641 | 21.92968183 | 18.68305814 |
| Ca | 23.77745818 | 1.03351510  | 11.22657571 |
| Ca | 23.31657438 | 6.25852036  | 17.95982994 |
| Ca | 17.94209513 | 1.00918394  | 11.39540139 |
| Ca | 28.54969035 | 20.33415292 | 21.02497088 |
| Ca | 16.98990624 | 17.44806786 | 12.88530237 |
| Ca | 16.18061064 | 0.66776416  | 20.64436292 |
| O  | 2.60317350  | 10.82485197 | 13.18245195 |
| O  | 7.23062410  | 17.54445246 | 13.86566005 |
| O  | 6.37053018  | 10.96525067 | 18.66485990 |
| O  | 11.83154140 | 23.31679178 | 14.73660503 |
| O  | 4.94339960  | 5.12282275  | 13.33473088 |
| O  | 8.90559659  | 12.30907094 | 14.36263286 |
| O  | 8.02869409  | 6.13294934  | 18.74295822 |
| O  | 13.08574755 | 18.78023391 | 14.22738701 |
| O  | 12.06442202 | 12.15456881 | 19.28610031 |
| O  | 11.99379586 | 5.93202333  | 14.28063558 |
| O  | 15.73712200 | 23.88601768 | 19.63283076 |
| O  | 2.72607144  | 4.57122409  | 19.02830414 |
| O  | 4.62204796  | 22.81540373 | 13.48185665 |
| O  | 2.29117482  | 17.50477253 | 16.73003815 |
| O  | 8.14178406  | 23.21805897 | 19.33134711 |
| O  | 16.20551072 | 12.73126931 | 14.14680675 |
| O  | 20.29747882 | 18.58247992 | 14.35958098 |
| O  | 19.85407080 | 12.45632318 | 18.30958933 |

|   |             |             |             |
|---|-------------|-------------|-------------|
| O | 20.00051730 | 0.71854544  | 12.66802322 |
| O | 24.22772282 | 19.38181900 | 18.14610311 |
| O | 17.73332250 | 6.94426308  | 12.73639065 |
| O | 21.10530288 | 14.06180209 | 13.56144216 |
| O | 25.76339336 | 13.79301138 | 17.26481828 |
| O | 25.45648696 | 7.42419907  | 12.51967885 |
| O | 25.02274124 | 1.87877942  | 17.10830145 |
| O | 15.86225007 | 6.24056782  | 19.10806824 |
| O | 16.49383418 | 18.90440849 | 19.03544407 |
| O | 17.67592917 | 1.00991250  | 18.60072045 |
| O | 4.43775051  | 12.05185367 | 14.72257976 |
| O | 2.50055095  | 13.46001337 | 13.69636759 |
| O | 6.72821061  | 15.28729843 | 15.04331493 |
| O | 4.64466590  | 16.75697795 | 14.51806142 |
| O | 8.00322250  | 12.52529945 | 17.39216913 |
| O | 5.51257433  | 13.32156137 | 17.33267137 |
| O | 6.31857314  | 9.21480408  | 16.67775182 |
| O | 4.07565083  | 10.23135980 | 17.41038163 |
| O | 8.16941777  | 18.90970482 | 15.92406649 |
| O | 5.90150535  | 19.79908953 | 14.59340608 |
| O | 10.73416814 | 22.26808255 | 16.81561385 |
| O | 9.09527339  | 23.07931813 | 14.67084148 |
| O | 5.09838451  | 7.47439304  | 14.37340499 |
| O | 7.30624768  | 6.12694021  | 14.29678798 |
| O | 6.87189250  | 10.64980476 | 13.92395412 |
| O | 9.31868615  | 9.75733914  | 14.74142864 |
| O | 8.65680187  | 7.60578522  | 16.69136155 |



|   |             |             |             |
|---|-------------|-------------|-------------|
| O | 10.69466884 | 6.66729882  | 18.22691308 |
| O | 7.14057328  | 4.37851194  | 16.88539845 |
| O | 9.16562222  | 3.64274442  | 18.59106135 |
| O | 9.55302439  | 14.93663307 | 14.07280918 |
| O | 11.45400409 | 13.05416795 | 14.66278164 |
| O | 10.89930321 | 17.90706890 | 15.32588265 |
| O | 13.22206800 | 16.49191321 | 15.84127192 |
| O | 12.29311985 | 14.46787020 | 18.07796037 |
| O | 27.96986333 | 11.43850959 | 16.36897283 |
| O | 10.54135749 | 11.23376383 | 17.34166033 |
| O | 12.90845432 | 10.16216004 | 17.55426831 |
| O | 7.71499460  | 1.54845244  | 14.59105088 |
| O | 9.85779069  | 0.86498842  | 16.29229524 |
| O | 9.62375863  | 4.85124992  | 14.36792167 |
| O | 11.65674393 | 4.03505344  | 16.14345088 |
| O | 4.29100986  | 23.21192717 | 16.80342932 |
| O | 11.70828313 | 2.15701950  | 18.96139649 |
| O | 15.14850822 | 22.06483126 | 17.78107004 |
| O | 13.09442386 | 23.21958099 | 18.96394576 |
| O | 11.63649155 | 8.28007588  | 15.48040552 |
| O | 14.06436302 | 7.14152105  | 15.42262580 |
| O | 13.78471623 | 11.85807308 | 14.88954764 |
| O | 2.62201751  | 8.73915199  | 14.82196137 |
| O | 4.73298715  | 5.79750088  | 17.85818749 |
| O | 2.52694203  | 5.18525731  | 16.43065794 |
| O | 2.50056695  | 2.23135927  | 17.85237624 |
| O | 13.35745312 | 5.58890535  | 18.15532832 |

|   |             |             |             |
|---|-------------|-------------|-------------|
| O | 14.06195548 | 21.26179412 | 14.44033477 |
| O | 15.08543083 | 19.31396155 | 16.00721959 |
| O | 3.44148258  | 20.58331839 | 16.43588035 |
| O | 3.54693958  | 16.42136224 | 18.81995845 |
| O | 5.24448898  | 18.11650862 | 17.61750069 |
| O | 3.14429963  | 14.94457619 | 16.65085694 |
| O | 14.38836733 | 17.50208392 | 18.65316893 |
| O | 1.35762187  | 0.74066008  | 12.44642015 |
| O | 3.02866125  | 0.54615098  | 14.65762798 |
| O | 2.69812765  | 3.77041046  | 13.55933925 |
| O | 4.69624225  | 3.21845900  | 15.25377929 |
| O | 7.27771214  | 0.33639307  | 18.88954431 |
| O | 5.06650432  | 1.01054591  | 17.46506266 |
| O | 8.98646594  | 20.78847601 | 18.50875527 |
| O | 6.88920318  | 22.12810683 | 17.25471932 |
| O | 18.16341587 | 13.99266957 | 15.19046588 |
| O | 15.62914107 | 14.60708562 | 16.07344767 |
| O | 19.91878038 | 16.82199751 | 16.33893904 |
| O | 17.69677174 | 17.95829586 | 15.24628617 |
| O | 21.03371565 | 14.79593567 | 18.43370920 |
| O | 18.66463071 | 14.59477837 | 19.40484135 |
| O | 19.26071899 | 10.15529429 | 17.26599565 |
| O | 17.31392601 | 11.85577385 | 17.69313523 |
| O | 20.04257344 | 21.21281249 | 14.80953519 |
| O | 18.53383638 | 19.79133242 | 12.96679668 |
| O | 22.07430839 | 23.82998713 | 14.81839156 |
| O | 21.32389092 | 23.08550839 | 12.36274415 |

|   |             |             |             |
|---|-------------|-------------|-------------|
| O | 24.05550979 | 19.23605335 | 15.40694334 |
| O | 24.51404124 | 21.60827518 | 16.68265116 |
| O | 22.26700567 | 17.45844473 | 18.28655787 |
| O | 21.81098223 | 19.71280536 | 17.05275248 |
| O | 18.52728669 | 8.67991644  | 14.74569914 |
| O | 20.30458900 | 7.46874511  | 13.11233014 |
| O | 20.56717847 | 12.23866087 | 15.39786565 |
| O | 21.99577475 | 11.38785252 | 13.18271992 |
| O | 22.34717875 | 15.20091393 | 15.71068787 |
| O | 23.82371048 | 14.20618422 | 13.55609281 |
| O | 26.94147841 | 15.34429157 | 15.40772255 |
| O | 14.40710468 | 12.98416235 | 18.13987378 |
| O | 24.17762176 | 11.77795167 | 16.52089963 |
| O | 25.63083913 | 11.51206297 | 18.73833700 |
| O | 20.92549557 | 2.68774059  | 14.21145191 |
| O | 22.64675232 | 0.67307621  | 13.40380120 |
| O | 22.85200270 | 6.65759256  | 13.02430893 |
| O | 24.82342926 | 4.85579256  | 12.59500735 |
| O | 13.22168325 | 0.73735829  | 17.26837058 |
| O | 26.50650556 | 3.03088404  | 15.40701003 |
| O | 27.42502207 | 23.48755553 | 17.19505562 |
| O | 22.50086751 | 1.20183938  | 16.88407783 |
| O | 24.38130299 | 9.41343348  | 14.06204884 |
| O | 26.90960109 | 9.48545931  | 13.32910671 |
| O | 26.14922446 | 12.71923112 | 13.03608425 |
| O | 16.02908707 | 10.29293391 | 15.11042542 |
| O | 17.79420176 | 7.00434962  | 17.34281856 |

|   |             |             |             |
|---|-------------|-------------|-------------|
| O | 15.64033452 | 8.48295786  | 17.62786627 |
| O | 15.44097399 | 4.31178473  | 17.26003854 |
| O | 26.59908689 | 8.27090970  | 16.59238302 |
| O | 28.72472722 | 23.96288774 | 13.71800404 |
| O | 19.24019866 | 19.11942345 | 19.40845787 |
| O | 17.98015736 | 20.65863861 | 17.70195721 |
| O | 16.74211153 | 16.36924562 | 18.30355069 |
| O | 3.40585057  | 19.12417107 | 19.41546210 |
| O | 16.37107430 | 5.65272317  | 14.59346650 |
| O | 18.59383068 | 4.49476361  | 13.78169024 |
| O | 19.79126954 | 1.81124282  | 17.10399564 |
| O | 17.44068544 | 2.56003785  | 16.42959274 |
| O | 21.64913214 | 22.81376822 | 17.48113416 |
| O | 19.37746385 | 24.09326421 | 16.66115316 |
| O | 4.34909116  | 12.31458598 | 11.99189327 |
| H | 1.99525723  | 13.78943608 | 12.89655388 |
| O | 5.98385613  | 15.75094185 | 12.37853252 |
| H | 6.47690303  | 14.84891508 | 12.28708565 |
| O | 6.76335461  | 13.32458013 | 12.44611588 |
| H | 5.78784816  | 13.33009887 | 12.27902387 |
| O | 27.98111487 | 15.41492531 | 12.22046966 |
| H | 28.54346495 | 15.51802639 | 11.43947369 |
| O | 6.74718031  | 13.26544542 | 19.76956446 |
| O | 5.53211940  | 8.47635735  | 19.11655170 |
| H | 4.53716663  | 4.64833066  | 22.01324248 |
| O | 5.49678490  | 4.78540955  | 22.07927193 |
| O | 2.33310334  | 7.12663141  | 18.29196078 |

|   |             |             |             |
|---|-------------|-------------|-------------|
| O | 8.28093330  | 19.78972545 | 13.26577202 |
| H | 7.78458929  | 19.49883182 | 12.47733277 |
| O | 10.73414743 | 21.04767516 | 14.43235309 |
| H | 6.98863561  | 22.43296714 | 10.97589512 |
| O | 7.56700348  | 21.74366122 | 10.52056682 |
| H | 6.96773336  | 21.13151927 | 10.07068978 |
| O | 12.44614542 | 20.18626835 | 17.61668322 |
| H | 12.12302338 | 20.15601886 | 18.58157595 |
| O | 11.58160213 | 20.25768347 | 20.07437857 |
| H | 12.32241710 | 20.21052714 | 20.69199027 |
| O | 9.79005559  | 15.66723110 | 17.48524212 |
| H | 9.67498034  | 16.46502725 | 18.06140457 |
| O | 7.21383422  | 16.21947255 | 18.30173689 |
| H | 8.04341527  | 15.74402202 | 18.07322294 |
| O | 9.48919017  | 13.31683607 | 20.51887017 |
| O | 6.44105375  | 6.86525548  | 11.91842136 |
| H | 5.78088769  | 8.18171856  | 11.42388584 |
| O | 8.84572856  | 10.70304501 | 12.15947250 |
| H | 9.36552665  | 11.51292749 | 11.93591011 |
| O | 10.03190546 | 7.33834530  | 12.30166594 |
| H | 9.81504124  | 8.20652823  | 11.92740007 |
| O | 5.32602338  | 9.08428253  | 11.18433494 |
| H | 4.37834721  | 8.92972072  | 11.35898300 |
| O | 9.01194605  | 8.61928882  | 19.04170695 |
| O | 6.59187970  | 4.10046307  | 19.40097822 |
| O | 23.56171852 | 3.16792037  | 20.59581807 |
| O | 5.21950196  | 1.54608188  | 20.07341764 |

|   |             |             |             |
|---|-------------|-------------|-------------|
| H | 22.98855592 | 2.86610091  | 21.33334285 |
| O | 10.35439397 | 13.06245031 | 12.28004750 |
| H | 10.04696352 | 13.78985034 | 11.71389884 |
| O | 11.93338799 | 16.68918017 | 13.33224381 |
| H | 12.60030625 | 16.09054072 | 12.94100095 |
| O | 14.02397682 | 14.67666400 | 12.73582819 |
| H | 14.94397794 | 14.98349646 | 13.05511687 |
| O | 17.17070383 | 13.16890031 | 11.15978199 |
| H | 16.70773423 | 12.42088435 | 11.58244147 |
| O | 13.41298126 | 14.00072357 | 20.52833126 |
| O | 11.10519980 | 9.83659696  | 19.62890329 |
| H | 9.92265855  | 9.01960336  | 19.34809792 |
| O | 10.45156416 | 9.42856567  | 22.74237097 |
| O | 13.41454079 | 8.35195392  | 20.08068477 |
| H | 12.58401898 | 8.87207274  | 20.15435714 |
| O | 10.19872261 | 0.74318584  | 13.63763514 |
| H | 10.40613647 | 1.62267627  | 13.25768560 |
| O | 7.27174201  | 3.64286591  | 12.15434968 |
| H | 6.54606842  | 4.14419427  | 11.74028217 |
| O | 11.64364468 | 3.29746000  | 13.62957909 |
| H | 12.50427540 | 3.59251980  | 13.12348579 |
| O | 14.41959162 | 1.55537235  | 19.40372187 |
| O | 14.76143405 | 21.47096543 | 20.28745520 |
| O | 13.00779250 | 8.06614750  | 13.10997123 |
| H | 12.52098327 | 9.01391932  | 12.96272242 |
| O | 11.90297678 | 10.30417196 | 12.88885436 |
| H | 11.01868730 | 10.09667496 | 12.54661383 |

|   |             |             |             |
|---|-------------|-------------|-------------|
| O | 2.48769013  | 8.27037206  | 12.29325597 |
| H | 1.86770579  | 8.21860497  | 11.54981177 |
| O | 27.24359839 | 5.93246782  | 14.29192382 |
| H | 26.66596331 | 6.60360767  | 13.88553658 |
| O | 26.82764126 | 3.70407263  | 18.07380524 |
| H | 26.50905772 | 21.24718272 | 23.24280771 |
| O | 16.30903733 | 7.93625627  | 22.15249737 |
| O | 15.65644624 | 19.24473496 | 13.46474882 |
| H | 7.44125129  | 0.56371608  | 12.91512311 |
| O | 10.54685596 | 24.16290118 | 12.14607351 |
| H | 7.22263073  | 0.53609276  | 11.39486648 |
| O | 11.07615366 | 20.92187695 | 11.70242664 |
| H | 11.11436416 | 20.80115218 | 10.74147199 |
| O | 5.55528394  | 17.62933270 | 20.15028750 |
| O | 16.02987051 | 17.02595061 | 20.88928547 |
| H | 15.29479194 | 13.92575629 | 20.76415266 |
| O | 6.99255582  | 23.49092021 | 12.36990233 |
| H | 24.76778826 | 3.24389224  | 12.26341941 |
| O | 4.97843407  | 2.43572837  | 12.75607717 |
| H | 5.90911025  | 2.71296149  | 12.46429237 |
| O | 25.15686712 | 2.34466508  | 12.43284745 |
| H | 23.88463016 | 4.28410809  | 13.91265312 |
| O | 6.58184524  | 20.92911189 | 19.56443241 |
| H | 19.95638866 | 15.91464582 | 24.10052196 |
| O | 3.94910480  | 21.05292066 | 22.21925442 |
| H | 4.38355233  | 20.17660717 | 22.30853188 |
| O | 16.44761356 | 15.33511042 | 13.63170668 |

|   |             |             |             |
|---|-------------|-------------|-------------|
| H | 16.45222498 | 13.75919341 | 10.83974169 |
| O | 19.18470503 | 16.42313322 | 13.70757351 |
| H | 23.90195930 | 16.93100614 | 13.12438072 |
| O | 20.69221528 | 13.27017234 | 20.73126134 |
| H | 24.03576375 | 13.85344563 | 22.74707941 |
| O | 18.43737871 | 10.64064548 | 19.85144296 |
| H | 17.97757676 | 9.73579279  | 19.74397865 |
| O | 20.92945417 | 7.26544183  | 18.81676178 |
| H | 20.65734580 | 7.99725304  | 19.39324904 |
| O | 15.33276458 | 10.63706065 | 20.28955935 |
| H | 14.71390103 | 9.89167711  | 20.43428692 |
| O | 17.45526064 | 8.21291173  | 19.70774209 |
| H | 16.95590531 | 8.10347562  | 20.56594921 |
| O | 21.17211202 | 20.32816130 | 12.51666515 |
| H | 21.30408143 | 21.32862474 | 12.36162527 |
| O | 23.71580462 | 22.27293996 | 13.47356101 |
| H | 29.07475163 | 24.27594604 | 9.76750990  |
| O | 17.78015737 | 2.89159461  | 10.36948627 |
| H | 17.88253347 | 3.35206796  | 9.52890335  |
| O | 26.39258238 | 19.65631845 | 16.59129302 |
| H | 5.44109220  | 10.78216250 | 22.28616207 |
| O | 22.05824392 | 19.78286574 | 19.71207459 |
| O | 19.69803438 | 16.88313128 | 21.10760586 |
| H | 20.29372868 | 16.25839829 | 21.56475385 |
| O | 23.46540112 | 14.12037674 | 22.00241761 |
| O | 18.63840607 | 9.42543395  | 12.22068154 |
| H | 18.65183257 | 9.17193019  | 11.28406637 |



|   |             |             |             |
|---|-------------|-------------|-------------|
| O | 19.41810346 | 12.12145875 | 13.04418018 |
| H | 19.36883967 | 11.31132619 | 12.49419142 |
| O | 22.35021612 | 9.08238148  | 11.17864966 |
| H | 21.94126357 | 9.92296699  | 10.92467619 |
| O | 21.78811217 | 9.27355274  | 15.92790411 |
| H | 22.45086186 | 8.79302580  | 16.50264866 |
| O | 22.12768349 | 6.25576198  | 15.91856727 |
| H | 22.68596723 | 6.55843838  | 15.18023092 |
| O | 19.96469913 | 5.03884662  | 16.45020122 |
| H | 20.76261514 | 5.60884228  | 16.29026770 |
| O | 23.50886308 | 3.83762789  | 14.73462841 |
| H | 24.00365221 | 4.31784548  | 15.49806269 |
| O | 21.95796707 | 4.37334056  | 18.58474952 |
| O | 18.39159898 | 3.62390488  | 18.65864832 |
| H | 22.44776824 | 3.95830635  | 19.32378159 |
| O | 22.38469027 | 16.50226880 | 13.47068731 |
| H | 22.02255363 | 19.35807837 | 11.02989808 |
| O | 24.89221292 | 17.16270591 | 12.96670504 |
| H | 24.87935787 | 17.99894486 | 12.47778116 |
| O | 22.03072441 | 18.50977473 | 10.53026726 |
| H | 22.93165090 | 18.37837155 | 10.19995693 |
| O | 28.25990416 | 18.09714618 | 14.07522812 |
| H | 28.18905274 | 18.39272440 | 13.15498447 |
| O | 25.10626462 | 16.41713697 | 16.96843520 |
| O | 23.56920239 | 13.19493377 | 18.73361201 |
| H | 23.27091510 | 9.07981891  | 18.43957113 |
| O | 22.23935837 | 10.44034903 | 19.25931713 |

|   |             |             |             |
|---|-------------|-------------|-------------|
| H | 21.60917308 | 9.82230102  | 19.65606933 |
| O | 23.67350635 | 8.47978192  | 17.77087126 |
| O | 21.83846677 | 2.37095094  | 11.62414027 |
| H | 21.47838968 | 3.39398397  | 11.49274348 |
| O | 20.90131050 | 4.70232423  | 11.48060615 |
| H | 19.98832326 | 4.45809288  | 11.24742823 |
| O | 23.85186594 | 6.45348231  | 10.59825677 |
| H | 24.36222008 | 7.16453230  | 10.17950055 |
| O | 24.79685026 | 4.63506190  | 16.80574129 |
| H | 26.10265639 | 0.78255783  | 24.52597197 |
| O | 23.78621764 | 0.88599260  | 19.26644304 |
| O | 24.52592870 | 23.35083159 | 19.26424696 |
| O | 4.88211483  | 23.28935270 | 19.78638772 |
| H | 4.03118186  | 23.65650067 | 20.07027361 |
| O | 24.95229372 | 9.82511991  | 11.48041776 |
| H | 24.02497916 | 9.50598245  | 11.22664811 |
| O | 24.42660132 | 13.66706279 | 10.66375082 |
| H | 24.63563682 | 13.42306090 | 9.75338994  |
| O | 14.94587556 | 11.04187556 | 12.66236228 |
| H | 14.70199151 | 10.11206249 | 12.51344418 |
| O | 10.52172250 | 4.91265721  | 10.80667454 |
| H | 10.61514158 | 3.95972870  | 10.66838140 |
| O | 14.69706655 | 4.10316902  | 19.92865637 |
| H | 14.50893837 | 3.12910717  | 19.76588070 |
| O | 0.26365734  | 0.33852514  | 25.03732250 |
| O | 26.69055263 | 22.95277688 | 11.18195530 |
| H | 26.49793514 | 22.43534932 | 10.38829100 |

|   |             |             |             |
|---|-------------|-------------|-------------|
| O | 27.42608595 | 21.33437856 | 14.44463125 |
| H | 27.11557121 | 20.63542886 | 15.05049745 |
| O | 29.43817724 | 23.16046433 | 11.26283916 |
| H | 28.49186030 | 22.83535322 | 11.30539514 |
| O | 25.31023374 | 0.67468498  | 9.26607479  |
| H | 25.91286114 | 1.35819580  | 8.93377827  |
| O | 17.40129488 | 22.48187588 | 15.03466438 |
| H | 16.55363756 | 22.77229505 | 14.66147874 |
| O | 17.55092511 | 20.86108460 | 20.43668987 |
| H | 16.58484315 | 20.95587996 | 20.59058050 |
| O | 26.79069118 | 19.85411274 | 19.62848350 |
| H | 26.09175206 | 19.19158067 | 19.51549343 |
| O | 11.30228284 | 14.20095149 | 24.66154278 |
| O | 16.25760622 | 13.78636257 | 20.65978866 |
| H | 13.15509837 | 13.34570454 | 21.30304680 |
| O | 14.18382041 | 2.42106841  | 15.03382535 |
| H | 14.19980686 | 2.38276175  | 14.06677017 |
| O | 16.77987456 | 1.34609235  | 13.32835976 |
| H | 16.17776677 | 2.10165921  | 13.42365646 |
| O | 16.54162314 | 4.70803944  | 12.00335054 |
| H | 17.05493161 | 4.05333955  | 11.43698072 |
| O | 13.64942307 | 4.51328658  | 12.66634689 |
| H | 14.49808060 | 4.32257500  | 12.22937196 |
| O | 19.48544654 | 23.03546475 | 19.03546033 |
| O | 21.37726438 | 21.26646152 | 22.22912939 |
| H | 22.19050919 | 21.36857671 | 21.67001181 |
| O | 16.01369831 | 2.35427843  | 22.22224059 |

|   |             |             |             |
|---|-------------|-------------|-------------|
| H | 15.19193364 | 2.81083692  | 21.97893259 |
| O | 1.31140779  | 2.70033472  | 20.29262448 |
| H | 0.59855894  | 3.30908712  | 20.66468160 |
| H | 29.01313385 | 19.45807209 | 25.22372646 |
| O | 25.23277123 | 8.55128105  | 21.41545219 |
| H | 26.15874326 | 8.50274274  | 21.76428711 |
| H | 24.64768770 | 8.48193250  | 22.20378747 |
| O | 28.69307946 | 18.58352896 | 25.55078257 |
| H | 2.64026762  | 17.92860694 | 25.01632711 |
| H | 4.05291581  | 24.18242845 | 24.36711738 |
| O | 9.63500957  | 19.51435712 | 21.62637227 |
| H | 10.38582636 | 19.83218300 | 21.00196324 |
| H | 10.12205324 | 19.10729043 | 22.36179372 |
| O | 7.86800294  | 21.20099411 | 22.66323756 |
| H | 8.54859339  | 20.62648893 | 22.18203298 |
| H | 7.60382890  | 20.62424221 | 23.41918902 |
| O | 28.66100234 | 21.66900950 | 18.96615308 |
| H | 27.47739678 | 16.21534097 | 21.07038697 |
| H | 28.76402444 | 22.58324721 | 18.64612520 |
| O | 5.25005776  | 18.57585949 | 22.59880840 |
| H | 5.99367175  | 18.77767043 | 23.21568986 |
| H | 4.69357231  | 17.89816973 | 23.06541731 |
| O | 19.49048171 | 11.44774798 | 24.22911644 |
| H | 18.81732836 | 10.80546593 | 23.87222220 |
| H | 20.35472352 | 11.16361666 | 23.87841768 |
| O | 23.61940705 | 12.58354725 | 24.58815498 |
| H | 23.34986538 | 13.34530983 | 25.14921921 |

|   |             |             |             |
|---|-------------|-------------|-------------|
| H | 24.45654688 | 12.21908028 | 24.95803147 |
| O | 25.93553437 | 4.37916759  | 21.11121084 |
| H | 25.88166755 | 4.75394850  | 22.01694845 |
| H | 25.04673446 | 3.95401727  | 20.94066871 |
| O | 2.61466595  | 12.58853328 | 19.41025654 |
| H | 1.96462924  | 13.28042451 | 19.61740116 |
| H | 5.61595150  | 14.65860872 | 22.97029281 |
| O | 4.95384020  | 14.74981369 | 22.21994068 |
| H | 10.40449578 | 13.28144440 | 23.82907830 |
| H | 4.68463328  | 13.81405320 | 21.98355951 |
| O | 3.26669779  | 0.73612754  | 21.70530538 |
| H | 2.49464199  | 1.18608638  | 21.31476434 |
| H | 3.49219362  | 1.26180906  | 22.52250033 |
| O | 14.35946684 | 17.21833645 | 24.44969830 |
| H | 13.54784160 | 17.59834397 | 24.02556635 |
| H | 14.07563403 | 16.34492782 | 24.82913541 |
| O | 8.71493288  | 4.10535319  | 22.43145956 |
| H | 9.38261463  | 4.48960159  | 21.82644142 |
| H | 23.63513992 | 2.35589914  | 20.02087927 |
| O | 2.57627100  | 9.49064357  | 25.55036448 |
| H | 3.51028462  | 9.17463313  | 25.47513687 |
| H | 2.48891511  | 10.12917355 | 24.80971910 |
| O | 9.19741069  | 3.23474997  | 25.55387882 |
| H | 10.03996033 | 3.38203801  | 26.02124808 |
| H | 8.88795138  | 4.15341888  | 25.32085730 |
| O | 8.07819497  | 10.43490142 | 20.95279338 |
| H | 7.48759980  | 10.73937748 | 20.21729683 |

|   |             |             |             |
|---|-------------|-------------|-------------|
| H | 8.28366691  | 9.51858703  | 20.65501219 |
| O | 9.98358807  | 18.09516258 | 18.48897269 |
| H | 18.48001923 | 15.94359409 | 24.60074913 |
| H | 10.15987636 | 18.52932287 | 19.34441292 |
| O | 15.85496916 | 2.22563536  | 24.74879752 |
| H | 15.92004348 | 2.26929721  | 23.68568676 |
| H | 16.72983328 | 2.54879810  | 25.04401817 |
| O | 1.35482993  | 8.61567900  | 22.29327097 |
| H | 1.68787870  | 9.52303110  | 22.54955467 |
| H | 27.81138381 | 8.13349358  | 23.14872841 |
| O | 8.87664115  | 1.42530654  | 21.25110238 |
| H | 8.53738238  | 0.51027745  | 21.29813893 |
| H | 4.48014215  | 1.20972101  | 20.64898428 |
| O | 11.27168807 | 4.97315279  | 21.10536938 |
| H | 11.65870562 | 4.31061583  | 21.70488931 |
| H | 11.37451315 | 5.87280601  | 21.61319747 |
| O | 14.58015658 | 5.37487712  | 22.28821916 |
| H | 15.56271910 | 5.28327082  | 22.37188418 |
| H | 14.42095705 | 4.88980217  | 21.42496251 |
| O | 9.77835412  | 12.65869089 | 23.26061969 |
| H | 10.31560740 | 9.48960075  | 23.71075571 |
| H | 9.50823984  | 13.19824271 | 22.48416139 |
| O | 12.40926901 | 16.49498448 | 20.66434952 |
| H | 12.72917777 | 15.55423185 | 20.75140738 |
| H | 8.54734831  | 13.05383482 | 20.37254054 |
| O | 19.33026225 | 16.41944950 | 24.66859112 |
| H | 5.42049874  | 18.08466089 | 21.02892587 |

|   |             |             |             |
|---|-------------|-------------|-------------|
| H | 13.21494213 | 17.00649092 | 20.85501560 |
| O | 10.97676926 | 22.94297284 | 21.63757715 |
| H | 11.67003512 | 22.35855246 | 22.00377313 |
| H | 10.38083956 | 23.14553107 | 22.40605264 |
| O | 6.78596868  | 1.67467872  | 23.48459733 |
| H | 6.54439328  | 0.68545156  | 23.58544010 |
| H | 6.04221729  | 2.10962256  | 23.94774574 |
| O | 18.52656965 | 3.48989618  | 24.81906320 |
| H | 19.00212469 | 2.72276279  | 24.40845016 |
| H | 19.07122933 | 3.77523495  | 25.56671992 |
| O | 13.75949803 | 9.89558330  | 23.11372711 |
| H | 16.77374878 | 10.11637034 | 24.01065542 |
| H | 16.81955842 | 7.17961224  | 22.48703798 |
| O | 11.62837058 | 7.12702987  | 22.52198006 |
| H | 10.87975529 | 8.49878851  | 22.58321406 |
| H | 11.32663192 | 6.82761240  | 23.39765550 |
| O | 22.71685545 | 5.12084504  | 23.10602817 |
| H | 22.01597074 | 5.71904007  | 23.44271378 |
| H | 22.82305324 | 5.46813292  | 22.18129604 |
| O | 25.14897481 | 22.54729406 | 22.82189655 |
| H | 24.60197002 | 23.22356497 | 23.25469539 |
| H | 24.55141031 | 22.09711353 | 22.16135191 |
| O | 15.30313484 | 12.71651422 | 23.40277665 |
| H | 14.35648572 | 12.57559039 | 22.99510583 |
| H | 15.32048254 | 12.14465007 | 24.18945694 |
| O | 16.69306327 | 15.40449267 | 23.63734483 |
| H | 16.30280470 | 14.50476338 | 23.66447649 |

|   |             |             |             |
|---|-------------|-------------|-------------|
| H | 15.93291279 | 16.01070395 | 23.75419391 |
| O | 10.12532900 | 0.07005614  | 24.37474643 |
| H | 14.12378456 | 21.43684368 | 21.03628281 |
| H | 11.02087842 | -0.11665552 | 24.69746260 |
| O | 20.82218273 | 23.90126784 | 22.30456197 |
| H | 21.03349083 | 22.93350854 | 22.17332947 |
| H | 20.33740335 | 23.87722138 | 23.19122261 |
| O | 24.94091567 | 1.81718609  | 23.33537412 |
| H | 23.95239538 | 1.87555868  | 23.31934769 |
| H | 25.22660211 | 2.73541160  | 23.47518415 |
| O | 17.37895786 | 9.96995219  | 23.25992115 |
| H | 14.22047392 | 10.03598012 | 23.96190993 |
| H | 16.73535577 | 8.78228424  | 22.61473560 |
| O | 25.68812451 | 15.41167041 | 24.44632128 |
| H | 19.53791279 | 13.26046658 | 21.74731774 |
| H | 24.77719123 | 15.29659842 | 24.82246711 |
| O | 18.70838292 | 13.32203566 | 22.37063241 |
| H | 19.01344698 | 12.84661644 | 23.18779544 |
| H | 25.99324649 | 14.54389920 | 24.13075612 |
| O | 27.37184204 | 22.61546438 | 21.25253222 |
| H | 26.65278804 | 22.91154018 | 21.85346937 |
| H | 27.99869995 | 23.35198709 | 21.14334570 |
| O | 7.29564074  | 23.49103862 | 25.56315347 |
| H | 8.19302883  | 23.50514942 | 25.05545102 |
| H | 7.20958520  | 24.35224057 | 26.00359906 |
| O | 20.38322723 | 9.22239537  | 21.40948112 |
| H | 20.82165809 | 9.95487530  | 21.88195961 |



|   |             |             |             |
|---|-------------|-------------|-------------|
| H | 19.63611039 | 9.66746166  | 20.94694847 |
| O | 19.69326848 | 5.11819681  | 21.41400724 |
| H | 20.03119914 | 5.77187183  | 22.06264374 |
| H | 18.78074425 | 4.88579099  | 21.75103236 |
| O | 9.18806215  | 18.29987974 | 25.77257512 |
| H | 9.53032840  | 17.59496175 | 25.17173102 |
| H | 9.97324117  | 18.83811710 | 26.00660972 |
| O | 15.39389297 | 10.03177110 | 25.55494081 |
| H | 15.00517128 | 10.68851762 | 26.16835572 |
| H | 14.92987703 | 9.18032678  | 25.69466036 |
| O | 1.49357385  | 4.64498347  | 24.81850450 |
| H | 0.52704638  | 4.56891526  | 24.70930645 |
| H | 1.83238734  | 4.65636065  | 23.88676257 |
| O | 2.33894845  | 2.08672668  | 25.92585033 |
| H | 2.00637545  | 3.00338704  | 25.81823510 |
| H | 1.55806926  | 1.51812468  | 25.71566816 |
| O | 23.75102422 | 21.40582049 | 20.81140462 |
| H | 23.91826464 | 22.20378195 | 20.19059067 |
| H | 23.16568312 | 20.74549967 | 20.28690432 |
| O | 22.17649019 | 11.03052767 | 22.89586531 |
| H | 22.59645517 | 11.63741856 | 23.57142945 |
| H | 22.62932786 | 10.16692830 | 23.08938508 |
| O | 22.21759468 | 18.16866603 | 22.82097107 |
| H | 22.08780213 | 18.54205431 | 23.74967837 |
| H | 23.12512258 | 18.41046865 | 22.50306584 |
| O | 27.16840752 | 20.52688753 | 23.18616942 |
| H | 26.74234947 | 19.76417056 | 23.61480860 |

|   |             |             |             |
|---|-------------|-------------|-------------|
| H | 24.65507443 | 0.75843318  | 19.72331926 |
| O | 13.77042546 | 14.54168652 | 25.18552259 |
| H | 14.22438108 | 14.13514199 | 24.42414589 |
| H | 12.73042856 | 14.41252743 | 24.95410195 |
| O | 18.44215501 | 7.87355122  | 24.66303109 |
| H | 18.49435494 | 8.18318076  | 25.57963723 |
| H | 18.11753357 | 8.67830687  | 24.14860651 |
| O | 11.56053713 | 22.34533441 | 24.88900093 |
| H | 11.90304236 | 21.88167872 | 24.10098909 |
| H | 12.69310083 | 23.58120474 | 24.72003144 |
| O | 25.01603111 | 11.43497963 | 21.26995589 |
| H | 25.12194589 | 10.46265637 | 21.38033662 |
| H | 25.38178655 | 11.55591794 | 19.71186904 |
| O | 13.08303680 | 21.06638692 | 22.59469511 |
| H | 11.00644776 | 13.89505612 | 25.53586356 |
| H | 13.92440505 | 21.20278060 | 23.11299676 |
| O | 27.02361166 | 15.41178550 | 20.73355377 |
| H | 12.78476694 | 20.14792970 | 22.79504185 |
| H | 25.42530162 | 15.81430367 | 20.48029797 |
| O | 6.15726924  | 10.36580847 | 22.81505301 |
| H | 6.92837691  | 10.37252139 | 22.16634041 |
| H | 24.82167866 | 24.10157624 | 19.80197280 |
| O | 8.50587818  | 15.41753188 | 21.64389724 |
| H | 9.02121410  | 14.61110690 | 21.20647889 |
| H | 8.19173128  | 15.12376265 | 22.52654990 |
| O | 9.41209582  | 23.35918144 | 23.99208870 |
| H | 8.89608338  | 22.67976086 | 23.51098917 |

|   |             |             |             |
|---|-------------|-------------|-------------|
| H | 10.61978602 | 22.73690050 | 24.57455943 |
| O | 23.32018091 | 8.55559906  | 23.48459636 |
| H | 23.87629688 | 8.62571098  | 24.32124201 |
| H | 22.54237703 | 7.99380191  | 23.66816718 |
| O | 3.74025361  | 16.68682817 | 23.85237868 |
| H | 4.42380477  | 16.64980914 | 24.58677362 |
| H | 3.91782358  | 15.87880771 | 23.31029314 |
| O | 27.49799357 | 15.61242004 | 18.07701470 |
| H | 27.24295259 | 15.42942093 | 19.76107693 |
| H | 2.10483825  | 11.72529518 | 19.46122680 |
| O | 14.38559905 | 12.45498368 | 26.81565378 |
| H | 14.18143550 | 13.28500763 | 26.27764608 |
| H | 14.86829658 | 12.77289177 | 27.59386357 |
| O | 11.51138628 | 11.90694230 | 26.96620160 |
| H | 12.48312839 | 12.03084557 | 27.02683241 |
| H | 11.20017665 | 11.93009593 | 27.88360627 |
| O | 2.26656109  | 11.09254713 | 23.04044816 |
| H | 3.04033854  | 11.43507330 | 22.56476168 |
| H | 28.03155648 | 11.75109784 | 22.86122917 |
| O | 7.52889480  | 10.15014597 | 26.44947225 |
| H | 7.42194958  | 10.95798545 | 25.90027917 |
| H | 6.81410185  | 9.55166173  | 26.15167494 |
| O | 13.35445428 | 0.66406762  | 24.06881151 |
| H | 16.98704291 | 24.42075097 | 23.33820431 |
| H | 14.08076531 | 0.98831260  | 24.63108910 |
| O | 13.19421067 | 6.18844610  | 9.48731940  |
| H | 14.00884098 | 5.65918570  | 9.47503284  |

|   |             |             |             |
|---|-------------|-------------|-------------|
| H | 12.50956767 | 5.61708070  | 9.09238106  |
| O | 27.82579650 | 10.29144332 | 19.33744480 |
| H | 27.63898872 | 9.76277818  | 20.12830165 |
| H | 26.95957846 | 10.71857380 | 19.03816357 |
| O | 26.72104044 | 12.58587759 | 22.74055638 |
| H | 26.95560190 | 13.43303166 | 22.32861682 |
| H | 25.74497806 | 11.92157043 | 21.88559595 |
| O | 8.47789046  | 5.65848429  | 24.38593522 |
| H | 8.56186788  | 5.06945808  | 23.51284955 |
| H | 7.50903728  | 5.79369652  | 24.52721049 |
| O | 3.38418402  | 21.19067122 | 24.73339574 |
| H | 30.06550123 | 21.14440507 | 23.68144052 |
| H | 29.31307257 | 21.92527100 | 24.89054216 |
| O | 15.48337626 | 21.25440736 | 23.78196341 |
| H | 16.09299653 | 21.99843530 | 23.64753733 |
| H | 15.88891916 | 20.47116601 | 23.32562742 |
| O | 7.03736517  | 7.53583694  | 21.99102682 |
| H | 6.74416359  | 8.37102848  | 22.39342454 |
| H | 7.63203785  | 7.11201795  | 22.63442421 |
| O | 22.58094155 | 21.46432441 | 24.51794737 |
| H | 23.52130719 | 21.30829839 | 24.34428562 |
| H | 21.80334331 | 21.32690465 | 23.17806234 |
| O | 28.23209141 | 17.83819184 | 21.85782231 |
| H | 27.62167254 | 17.80082350 | 22.64465961 |
| H | 29.05986495 | 17.46080011 | 22.20138258 |
| O | 24.44377299 | 16.01487632 | 20.36918664 |
| H | 24.37158620 | 16.95972189 | 20.61903640 |

|   |             |             |             |
|---|-------------|-------------|-------------|
| H | 23.91731372 | 14.85247759 | 21.49675258 |
| O | 25.97209736 | 0.74097543  | 20.89838388 |
| H | 26.66507118 | 1.35600679  | 20.55263552 |
| H | 25.64955602 | 1.16950696  | 21.72787748 |
| O | 14.61791739 | 4.71320653  | 25.03553298 |
| H | 14.43677502 | 4.79888515  | 24.07061620 |
| H | 15.07012866 | 3.83373751  | 25.09555023 |
| O | 25.05445339 | 8.88656477  | 25.48135170 |
| H | 25.83875410 | 8.29790925  | 25.42549371 |
| H | 25.42673975 | 9.78574988  | 25.32699214 |
| O | 11.67385804 | 19.84274712 | 25.93640067 |
| H | 11.55882699 | 20.81157828 | 25.74608302 |
| H | 12.59576525 | 19.74991482 | 26.27586082 |
| O | 17.27409921 | 4.64455048  | 22.51927676 |
| H | 16.88372364 | 3.72064025  | 22.29246460 |
| H | 17.59982942 | 4.51933737  | 23.43443131 |
| O | 13.96942791 | 7.53152751  | 24.96567083 |
| H | 13.01176867 | 7.44414025  | 25.13050017 |
| H | 14.34250805 | 6.66317497  | 25.22869380 |
| O | 5.26127605  | 8.61824226  | 25.03787889 |
| H | 5.37544883  | 7.66736534  | 24.77771211 |
| H | 5.50224155  | 9.13064498  | 24.23996049 |
| O | 12.84042712 | 12.37792789 | 22.44417551 |
| H | 12.38323164 | 12.85228734 | 23.16461890 |
| H | 13.37662683 | 10.78075790 | 22.85538601 |
| O | 22.27588037 | 23.62850248 | 25.70579157 |
| H | 22.45273875 | 22.66671604 | 25.25578178 |

|   |             |             |             |
|---|-------------|-------------|-------------|
| H | 22.58212330 | 23.57927438 | 26.62240648 |
| O | 16.25225226 | 18.77734733 | 22.81647406 |
| H | 16.15585323 | 18.19324547 | 21.97323883 |
| H | 15.72960524 | 18.27801226 | 23.47480300 |
| O | 17.53464972 | 23.42982221 | 21.63755302 |
| H | 17.79965574 | 22.51628557 | 21.38657572 |
| H | 16.79130183 | 23.61308552 | 21.00578464 |
| O | 23.07932153 | 15.14179452 | 25.33690746 |
| H | 22.63847193 | 15.72879379 | 26.01344937 |
| H | 22.48851563 | 15.25305769 | 24.55569802 |
| O | 22.97417245 | 6.53521413  | 20.66134580 |
| H | 23.60296250 | 7.27017238  | 20.79474702 |
| H | 22.17599471 | 6.93468700  | 20.22533048 |
| O | 22.20971401 | 2.35465597  | 22.96665572 |
| H | 22.11767679 | 3.31762973  | 23.15029153 |
| H | 21.34058065 | 1.93358299  | 23.16438310 |
| O | 5.69471192  | 20.92898241 | 26.37167712 |
| H | 4.85624757  | 21.13355244 | 25.89151041 |
| H | 6.19478381  | 21.76749475 | 26.41694112 |
| O | 4.63694992  | 12.25446828 | 21.25541485 |
| H | 5.45552637  | 12.46385285 | 20.70512940 |
| H | 3.90617912  | 12.31133741 | 20.58376475 |
| O | 11.93195622 | 4.36889858  | 25.77711018 |
| H | 11.55339997 | 5.28296367  | 25.76432701 |
| H | 12.90890476 | 4.48929724  | 25.73148617 |
| O | 18.99588771 | 7.06730989  | 10.21972093 |
| H | 18.40004917 | 6.84540153  | 10.98384830 |

|   |             |             |             |
|---|-------------|-------------|-------------|
| H | 18.52549967 | 6.77213248  | 9.42689598  |
| O | 10.28348276 | 16.49248498 | 23.85481492 |
| H | 9.85071007  | 16.28385513 | 23.00410642 |
| H | 10.67043738 | 15.60392847 | 24.20400148 |
| O | 24.63644969 | 18.64119598 | 21.63586510 |
| H | 25.37187653 | 18.56858051 | 22.27002050 |
| H | 24.71514026 | 19.52765680 | 21.22585506 |
| O | 21.43373005 | 15.55814066 | 23.05076201 |
| H | 21.86902564 | 16.43824430 | 22.91726996 |
| H | 21.97932893 | 14.90482124 | 22.54724254 |
| O | 25.38446490 | 5.24946663  | 23.84548310 |
| H | 25.66420640 | 6.16542280  | 24.01819109 |
| H | 24.39813845 | 5.29115018  | 23.74111364 |
| O | 2.52951283  | 4.65413385  | 22.22284064 |
| H | 2.68773137  | 5.49181607  | 21.69529024 |
| H | 2.27357913  | 3.99820248  | 21.54721209 |
| O | 19.63959007 | 23.75551972 | 24.73787728 |
| H | 16.22126560 | 0.47536304  | 24.88873745 |
| H | 20.45420881 | 23.63060128 | 25.27812064 |
| O | 10.09979676 | 9.49713046  | 25.70296285 |
| H | 9.16235425  | 9.67083922  | 25.99527956 |
| H | 10.62537267 | 10.22442141 | 26.09207345 |
| O | 6.87966371  | 14.75035865 | 24.01532289 |
| H | 6.68617298  | 15.29438843 | 24.80379272 |
| H | 7.04469065  | 13.80612102 | 24.33171909 |
| O | 25.62370061 | 6.45421380  | 19.03496824 |
| H | 25.87763917 | 5.87791851  | 19.78693718 |

|   |             |             |             |
|---|-------------|-------------|-------------|
| H | 25.75654501 | 7.37711963  | 19.31336659 |
| O | 3.26101792  | 6.93238619  | 20.81714596 |
| H | 2.83907413  | 7.08223629  | 19.89462946 |
| H | 2.88924364  | 7.65958086  | 21.35784079 |
| O | 12.03429687 | 18.57012225 | 23.55560846 |
| H | 11.84291103 | 19.00386874 | 24.43476199 |
| H | 11.44880608 | 17.76023076 | 23.54016446 |
| O | 19.69779984 | 1.14578907  | 23.70780278 |
| H | 19.58147991 | 0.55968432  | 24.51134850 |
| H | 19.07226757 | 0.74817228  | 23.05596297 |
| O | 3.99621232  | 2.35263374  | 23.78380054 |
| H | 3.82076100  | 3.24932269  | 23.44517590 |
| H | 3.38852574  | 2.23277110  | 24.57017018 |
| O | 5.45942454  | 23.08250466 | 23.71612125 |
| H | 4.93775738  | 22.35586720 | 24.11034646 |
| H | 6.17256150  | 23.29578430 | 24.39904359 |
| O | 14.49533441 | 19.45340783 | 26.29982833 |
| H | 14.56130566 | 18.62592910 | 25.77560043 |
| H | 14.93939655 | 20.12576377 | 25.75447914 |
| O | 7.03840551  | 19.31445404 | 24.60247716 |
| H | 6.59094185  | 19.88928022 | 25.28162046 |
| H | 7.90434765  | 19.00618948 | 25.02673537 |
| O | 27.45643970 | 7.47431983  | 24.88701778 |
| H | 1.55438710  | 8.16788224  | 25.23491665 |
| H | 1.31071613  | 6.59761252  | 25.07649883 |
| O | 4.33145523  | 18.37121890 | 27.63112128 |
| H | 4.77464054  | 19.23830228 | 27.59118574 |



|   |             |             |             |
|---|-------------|-------------|-------------|
| H | 3.47975696  | 18.50688785 | 27.16846396 |
| O | 5.68572427  | 16.89102568 | 25.70330936 |
| H | 5.26553782  | 17.27069107 | 26.52077383 |
| H | 6.22894231  | 17.63695646 | 25.36805800 |
| O | 11.79890981 | 2.89458313  | 23.40881993 |
| H | 12.44177126 | 2.16094863  | 23.56755365 |
| H | 11.86976465 | 3.48399848  | 24.20888347 |
| O | 21.54977700 | 19.24068441 | 25.18835394 |
| H | 21.99634490 | 20.17137460 | 25.04731086 |
| H | 20.59909330 | 19.41156110 | 25.06619683 |
| O | 18.94308727 | 18.97258747 | 23.47785185 |
| H | 19.06921485 | 18.08011723 | 23.88907784 |
| H | 17.97315839 | 18.97589591 | 23.26247877 |
| O | 7.42783066  | 12.23745569 | 24.51837711 |
| H | 6.90940830  | 11.64671791 | 23.91540750 |
| H | 8.34073191  | 12.27760588 | 24.10988450 |
| O | 20.69109215 | 7.13968517  | 23.26140230 |
| H | 20.56578799 | 7.82184301  | 22.55317147 |
| H | 19.94219134 | 7.34938267  | 23.88811807 |
| O | 5.71166530  | 5.91783392  | 24.36449635 |
| H | 5.60305840  | 5.45540864  | 23.39915354 |
| H | 5.28933272  | 5.31326698  | 24.99253909 |
| O | 21.52392398 | 16.83254016 | 26.74818783 |
| H | 20.65640836 | 16.58159918 | 26.37760410 |
| H | 21.66211279 | 17.73537793 | 26.38327321 |
| O | 26.46766375 | 17.89381480 | 23.93587285 |
| H | 26.13318017 | 16.95982432 | 24.09745358 |

|   |             |             |             |
|---|-------------|-------------|-------------|
| H | 27.08153943 | 18.07531683 | 24.68940486 |
| O | 10.70268448 | 6.79913040  | 25.40847373 |
| H | 10.52969692 | 7.72969996  | 25.68745701 |
| H | 9.83071805  | 6.47514572  | 25.04728156 |
| O | 18.67218427 | 16.41504411 | 11.19095555 |
| H | 18.12325123 | 20.53806501 | 12.50316995 |
| H | 18.43111305 | 16.30749002 | 10.25818375 |
| O | 26.13436451 | 11.51233370 | 25.04284679 |
| H | 26.80299870 | 11.70509747 | 25.71714468 |
| H | 26.42608841 | 12.00660318 | 24.20028511 |
| C | 14.10868738 | 14.59055195 | 11.28225053 |
| O | 13.18919032 | 13.86013205 | 10.81308209 |
| O | 15.05166263 | 15.20437449 | 10.74061708 |

#### Reference:

- (1) Martin, M. G.; Siepmann, J. I. Novel Configurational-Bias Monte Carlo Method for Branched Molecules. Transferable Potentials for Phase Equilibria. 2. United-Atom Description of Branched Alkanes. *J. Phys. Chem. B* **1999**, *103* (21), 4508–4517. <https://doi.org/10.1021/jp984742e>.
- (2) Martin, M. G.; Thompson, A. P. Industrial Property Prediction Using Towhee and LAMMPS. *Fluid Phase Equilibria* **2004**, *217* (1), 105–110. <https://doi.org/10.1016/j.fluid.2003.06.007>.
- (3) M. G. Martin; “MCCCS Towhee: a tool for Monte Carlo molecular simulation”, *Mol. Simulat.* **39** 1212-1222 (2013) (accessed 2018 -09 -29).
- (4) Berendsen, H. J. C.; Postma, J. P. M.; van Gunsteren, W. F.; Hermans, J. Interaction Models for Water in Relation to Protein Hydration. In *Intermolecular Forces: Proceedings of the Fourteenth Jerusalem Symposium on Quantum Chemistry and Biochemistry Held in Jerusalem, Israel, April 13–16, 1981*; Pullman, B., Ed.; The Jerusalem Symposia on Quantum Chemistry and Biochemistry; Springer Netherlands: Dordrecht, 1981; pp 331–342. [https://doi.org/10.1007/978-94-015-7658-1\\_21](https://doi.org/10.1007/978-94-015-7658-1_21).
- (5) Harris, J. G.; Yung, K. H. Carbon Dioxide’s Liquid-Vapor Coexistence Curve And Critical Properties as Predicted by a Simple Molecular Model. *J. Phys. Chem.* **1995**, *99* (31), 12021–12024. <https://doi.org/10.1021/j100031a034>.
- (6) Qomi, M. J. A.; Bauchy, M.; Ulm, F.-J.; Pellenq, R. J.-M. Anomalous Composition-Dependent Dynamics of Nanoconfined Water in the Interlayer of Disordered Calcium-Silicates. *The Journal of Chemical Physics* **2014**, *140* (5), 054515. <https://doi.org/10.1063/1.4864118>.
- (7) Youssef, M.; Pellenq, R. J.-M.; Yildiz, B. Glassy Nature of Water in an Ultraconfining Disordered Material: The Case of Calcium–Silicate–Hydrate. *J. Am. Chem. Soc.* **2011**, *133* (8), 2499–2510. <https://doi.org/10.1021/ja107003a>.
